# Supplementary material
Source: Elsevier journal article supplement (https://rcastoragev2.blob.core.windows.net/97b530aee637977550e4d1f363a07d2b/mmc1.pdf)
Supplement: mmc1 [file mmc1.pdf]

# THE LANCET Microbe

## Supplementary appendix

This appendix formed part of the original submission and has been peer reviewed.  
We post it as supplied by the authors.

Supplement to: Chanda C, Kibengo F, Mutua M, et al. Safety and broad immunogenicity of HIVconsvX conserved mosaic candidate T-cell vaccines vectored by ChAdOx1 and MVA in HIV-CORE 006: a double-blind, randomised, placebo-controlled phase 1 trial in healthy adults living without HIV-1 in eastern and southern Africa. *Lancet Microbe* 2025. <https://doi.org/10.1016/j.lanmic.2024.101041>

## **Supplementary materials**

|                                                                                                              |           |
|--------------------------------------------------------------------------------------------------------------|-----------|
| <b><i>Materials and methods</i></b>                                                                          | <b>2</b>  |
| <b><i>Figure S1: Fresh IFN-<math>\gamma</math> ELISPOT responses shown for individual study subjects</i></b> | <b>4</b>  |
| <b><i>Figure S2: Volunteers' HLA class I and peptide pair mapping by STCL</i></b>                            | <b>8</b>  |
| <b><i>Figure S3: Gating strategy for <i>ex vivo</i> functional analysis of vaccine-elicited T-cells</i></b>  | <b>12</b> |
| <b><i>Figure S4: Gating strategy for <i>ex vivo</i> memory structure of vaccine-elicited T-cells</i></b>     | <b>12</b> |
| <b><i>Figure S5: Growth if IMCs of HIV-1 in volunteers' CD4<sup>+</sup> cells</i></b>                        | <b>13</b> |
| <b><i>Figure S6: Alignment of HIVconsvX mosaics 1 and 2 with the VIA IMCs</i></b>                            | <b>14</b> |
| <b><i>Figure S7: HLA class I allele frequencies and corresponding ELISPOT frequencies and VIA</i></b>        | <b>16</b> |
| <b><i>Table S1: Reasons for screen failure (by CRCs)</i></b>                                                 | <b>17</b> |
| <b><i>Table S2: Recruitment summary by sites and overall</i></b>                                             | <b>19</b> |
| <b><i>Table S3: Unsolicited AEs reported after administration of the vaccines or placebo</i></b>             | <b>20</b> |
| <b><i>Table S4: Laboratory abnormalities.</i></b>                                                            | <b>21</b> |
| <b><i>Table S5: HIV-1 infectious molecular clones (IMCs) used in VIA</i></b>                                 | <b>21</b> |
| <b><i>Table S6: Cross-clade HIV inhibition in vitro</i></b>                                                  | <b>22</b> |
| <b><i>Annex 1: The Study Protocol</i></b>                                                                    |           |

## Materials and Methods

### Vaccines

The ChAdOx1.tHIVconsv1 (C1) vaccine was manufactured, formulated and vialled under Good Manufacturing Practice (GMP) conditions at Advaxia Biologics (formerly Advent) s.r.l., Pomezia, Italy and was diluted in formulation buffer to  $1.3 \times 10^{11}$  virus particles (vp)/ml (75 vp/infectious unit). The MVA.tHIVconsv3 (M3) and MVA.tHIVconsv4 (M4) vaccines were manufactured, formulated and vialled under GMP conditions by IDT Biologika GmbH, Dessau-Roßlau, Germany and were diluted in formulation buffer to  $3.4 \times 10^8$  plaque-forming units (PFU)/ml for M3 and  $1.8 \times 10^8$  PFU/ml for M4. All vaccines were stored  $\leq -60$  °C until use.

### Peptides

The HIVconsvX peptides used in this trial were the same set as used in all clinical studies testing the HIVconsvX strategy.<sup>1-4</sup> Briefly, 90% pure 15-mer peptides overlapping by 11 amino acids (15/11 aa) (C001-C401) (GenScript Biotech, Oxford, UK) matching the two mosaics were reconstituted to 40 mg/ml in DMSO and diluted to working stock solutions of 4 mg/ml in PBS. For ELISPOT and ICS assays, peptides were divided into ten pools, P1 to P10, containing between 34-47 mostly paired peptides of mosaic 1 and 2 in the same pool in R10 (RPMI 1460 supplemented with 10% FBS, 2 mM L-glutamine, 1 mM sodium pyruvate, 10 mM HEPES and 1% penicillin/streptomycin; Sigma Aldrich) and used at final concentration of 1.5 µg/ml each. GenScript Biotech pooled the peptides. For peptide mapping, 2x-concentrated stocks of individual peptide pairs/peptides were prepared in peptide plates. A pool of Flu/EBV/CMV peptides consisting of 32 previously defined CD8<sup>+</sup> T-cell epitopes (CEF; NIH AIDS Research and Reference Program) was reconstituted in DMSO and used at a final concentration of 1 µg/ml as a positive control. All peptide stocks and plates were stored at -80 °C until use.

### Isolation and cryopreservation of PBMC

Blood was drawn into heparinized vacutainers (Becton Dickinson) and peripheral blood mononuclear cells (PBMC) were isolated within six hours and either used fresh or frozen for later analyses. After overnight freezing at -80 °C using Nalgene® Mr Frosty containers (Sigma-Aldrich), cryovials were transferred the next morning or the latest within 48 hours into the liquid nitrogen vapour for long-term storage.

### Fresh IFN-γ ELISPOT Assay

Fresh *ex vivo* IFN-γ ELISPOT assays were carried out at each of the CRCs as described previously.<sup>10</sup> Peptide stimuli were tested in triplicates, while the no-peptide background had six wells. The median number of SFU in no-peptide wells was subtracted from test wells and the results were expressed as the median (IQR) net SFU/10<sup>6</sup> PBMC. Each plate had an internal control with an NK cell line aiming to give 200 SFU per well. Electronic records for all plates are retained. Both the clinical and laboratory teams were blinded for the vaccine vs. placebo allocation.

### Short-term cell lines (STCL) and peptide mapping

STCL and peptide mapping were described previously.<sup>1</sup> Briefly, cryopreserved PBMC were thawed, and an equal volume of R10 plus 50 U/ml benzonase nuclease (Novagen, Paris, France) warmed to 37 °C was added dropwise. Cells were set up at  $1.3 \times 10^6$  cells/ml in R10 supplemented with 25 ng/ml IL-7 (R&D Systems) and expanded using positive peptide pools identified in the fresh ELISPOT assay for ten days to establish STCL. Cultures were supplemented with 100 IU/ml IL-2 (R&D Systems) on day three, and IL-2 plus fresh culture medium on day seven. On day ten, the cells were washed three times with culture medium, re-suspended in 1 ml of medium and placed with loose lids at 37 °C, 5% CO<sub>2</sub> for 48 hours to rest before an IFN-γ ELISPOT assay restimulating with individual peptide pairs. The ELISPOT assay input was 40,000 cells/well.

### Flow cell cytometry

ICS was described before.<sup>1</sup> Cryopreserved PBMC were thawed, resuspended in R10 medium at 10<sup>6</sup> cells/ml and labelled with anti-CD107a-FITC (Biolegend), stimulated with personalized pool of positive peptide pairs identified in the mapping (1.5 µg/ml of each peptide) or 1 µg/ml SEB (positive control) or R10 (negative control) and 1 µg/ml of anti-CD28 and anti-CD49d for 2 hours at 37 °C, 5% CO<sub>2</sub>.

Then, 10 µg/ml of GolgiPlug (BD Biosciences) and 0.7 µl/ml of GolgiStop (BD Biosciences) was added for a further 17 hours and the cells were stained with a dead-cell marker (LIVE/DEAD Fixable Aqua stain; Invitrogen) followed by incubation with anti-CD14, CD19 and CD16-BV510 (Biolegend), anti-CD4-PE/Cy7 (BioLegend), anti-CD3-PE/Cy5 (Biolegend), anti-CD8-BV650 (Biolegend) antibodies, permeabilized with 200 µl of Cytofix/Cytoperm solution (BD Biosciences), stained with anti-IFN-γ-V450 (BD Biosciences), anti-TNF-α-PE-Dazzle (Biolegend), anti-IL-2 PE (BD Biosciences), CCL-3-APC (Miltenyi Biotec) fixed in 1% paraformaldehyde and acquired on a BD Fortessa flow cytometer (BD Biosciences). Data analysis was performed using FlowJo (Tree Star) and SPICE (NIAID) software.

As described previously,<sup>10</sup> for memory assays, cells were incubated with 100 µl of a master mix of anti-membrane marker mAbs containing LIVE/DEAD fixable aqua stain, anti-CD14, anti-CD19 and anti-CD16-BV510, anti-CD4 PE/Cy7 anti-CCR7 BV421, anti-CD8 BV650, anti-CD45RA FITC, and anti-CD27 APC (all from Biolegend), permeabilised with Cytofix/Cytoperm, then stained with anti-CD3 PE/Cy5, anti-IFN-γ PE/Dazzle (Biolegend), anti-IL-2 PE and anti-TNF-α APC/Cy7) and analyzed as above.

### Virus inhibition assay (VIA)

VIA was performed on frozen PBMC in a blinded fashion as described previously.<sup>1,5</sup> Briefly, cryopreserved PBMC were thawed and the CD4<sup>+</sup> and CD8<sup>+</sup> T cells were polyclonally antigen-nonspecifically expanded by culture for seven days in R10 supplemented with IL-2 at 50 IU/ml and 0.5 µg/ml bi-specific antibodies (generously provided by J. Wong, Harvard Medical School, Boston, MA, US). Cultures were doubled in volume with fresh R10/IL-2 on days three and six. Culture with bi-specific anti-CD3/CD8 or anti-CD3/CD4 antibodies yielded >90% pure CD4<sup>+</sup> or CD8<sup>+</sup> T-cell populations, respectively. Expanded CD4<sup>+</sup> T cells were infected at a multiplicity of infection of 0.1 with eight separate HIV-1 IMCs, each engineered with the *Renilla reniformis* luciferase (*LucR*) reporter gene and cultured for three days in R10/IL-2. Autologous CD8<sup>+</sup> T cells cultured in parallel were then added at 1:1 effector/target (v/v) ratio and cocultured for an additional five days. Virus replication was quantified by detecting the luciferase enzyme activity in the cell lysates using Renilla-Glo™ Luciferase Assay System (Promega Ltd., UK). Luminescence was measured using a Tecan Infinite M200Pro plate reader (Tecan Ltd., Switzerland) and expressed in relative light units (RLU). RLU data were expressed as log<sub>10</sub> values with log<sub>10</sub> inhibition mediated by CD8<sup>+</sup> T-cells calculated by subtraction of RLU values of CD4<sup>+</sup>/CD8<sup>+</sup> T-cell co-cultures from RLU values of infected CD4<sup>+</sup> T-cell cultures alone. (Relative log<sub>10</sub> inhibition=[-log<sub>10</sub>(CD4+CD8 RLU/CD4 RLU)]. For each trial subject, CD4<sup>+</sup> T cells were expanded from the pre-vaccination time point D0 only to act as a common target T-cell population with CD8<sup>+</sup> T cells as effectors expanded from D0, D35 and D308. Pre-vaccination CD8<sup>+</sup> T-cells served as background controls. The VIA was reproducible by repeated testing across three clinical trial centres in Kenya, Uganda and the United Kingdom, with no significant differences in RLU values or calculated log<sub>10</sub> inhibition values across centres.<sup>5</sup>

### Method references

1. Borthwick N, Fernandez N, Hayes PJ, et al. Safety and immunogenicity of the ChAdOx1-MVA-vectored conserved mosaic HIVconsvX candidate T-cell vaccines in HIV-CORE 005.2: an open-label, dose-escalation, first-in-man phase 1 trial in adults living without HIV-1 in the UK. *Lancet Microbe* In press.
2. Murakoshi H, Zou C, Kuse N, et al. CD8<sup>+</sup> T cells specific for conserved, cross-reactive Gag epitopes with strong ability to suppress HIV-1 replication *Retrovirology* 2018; **15**: 46.
3. Ondondo B, Murakoshi H, Clutton G, et al. Novel Conserved-region T-cell Mosaic Vaccine With High Global HIV-1 Coverage Is Recognized by Protective Responses in Untreated Infection. *Mol Ther* 2016; **24**(4): 832-42.
4. Zou C, Murakoshi H, Kuse N, et al. Effective Suppression of HIV-1 Replication by Cytotoxic T Lymphocytes Specific for Pol Epitopes in Conserved Mosaic Vaccine Immunogens. *J Virol* 2019; **93**: e02142-18.
5. Fernandez N, Hayes P, Makinde J, et al. Assessment of a diverse panel of transmitted/founder HIV-1 infectious molecular clones in a luciferase based CD8 T-cell mediated viral inhibition assay. *Front Immunol* 2022; **13**: 1029029.

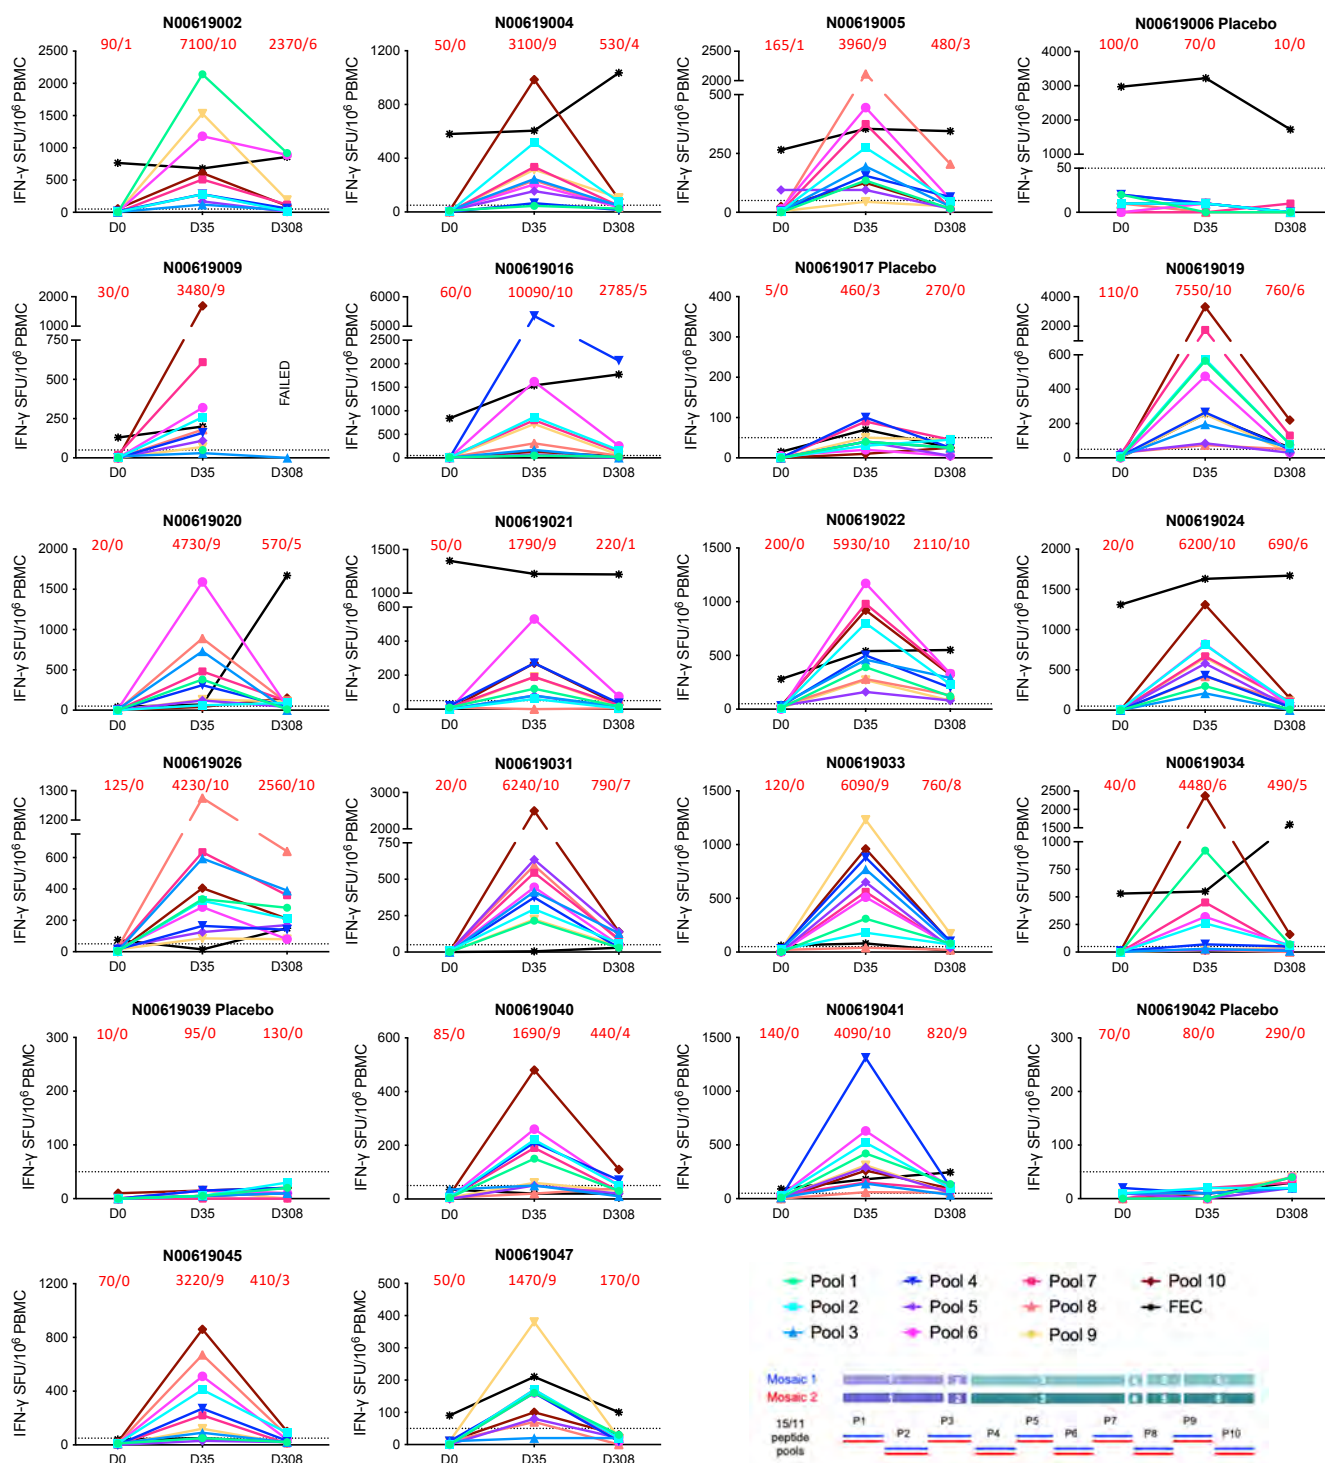

**Figure S1A: Fresh IFN- $\gamma$  ELISPOT responses shown for individual study subjects (MUL)**

In HIV-CORE 006, 71 healthy HIV-1/2-negative low-risk adults in Eastern and Southern Specific received either vaccine regimen C1-M3M4 or placebo on D0 and D28, and their HIVconsvX-specific T-cell frequencies were determined using an IFN- $\gamma$  ELISPOT assay and HIVconsvX peptide pools P1-P10 corresponding to the two mosaics 1 and 2 of the vaccines (bottom right). Each graph corresponds to a study individual (ID above) and provides frequencies of HIVconsvX-specific T cells before (D0), at peak responses (D35), and at the end of the study (D308). The red numbers above show the total frequencies (sum of ten pools)/number of responding HIVconsvX pools.

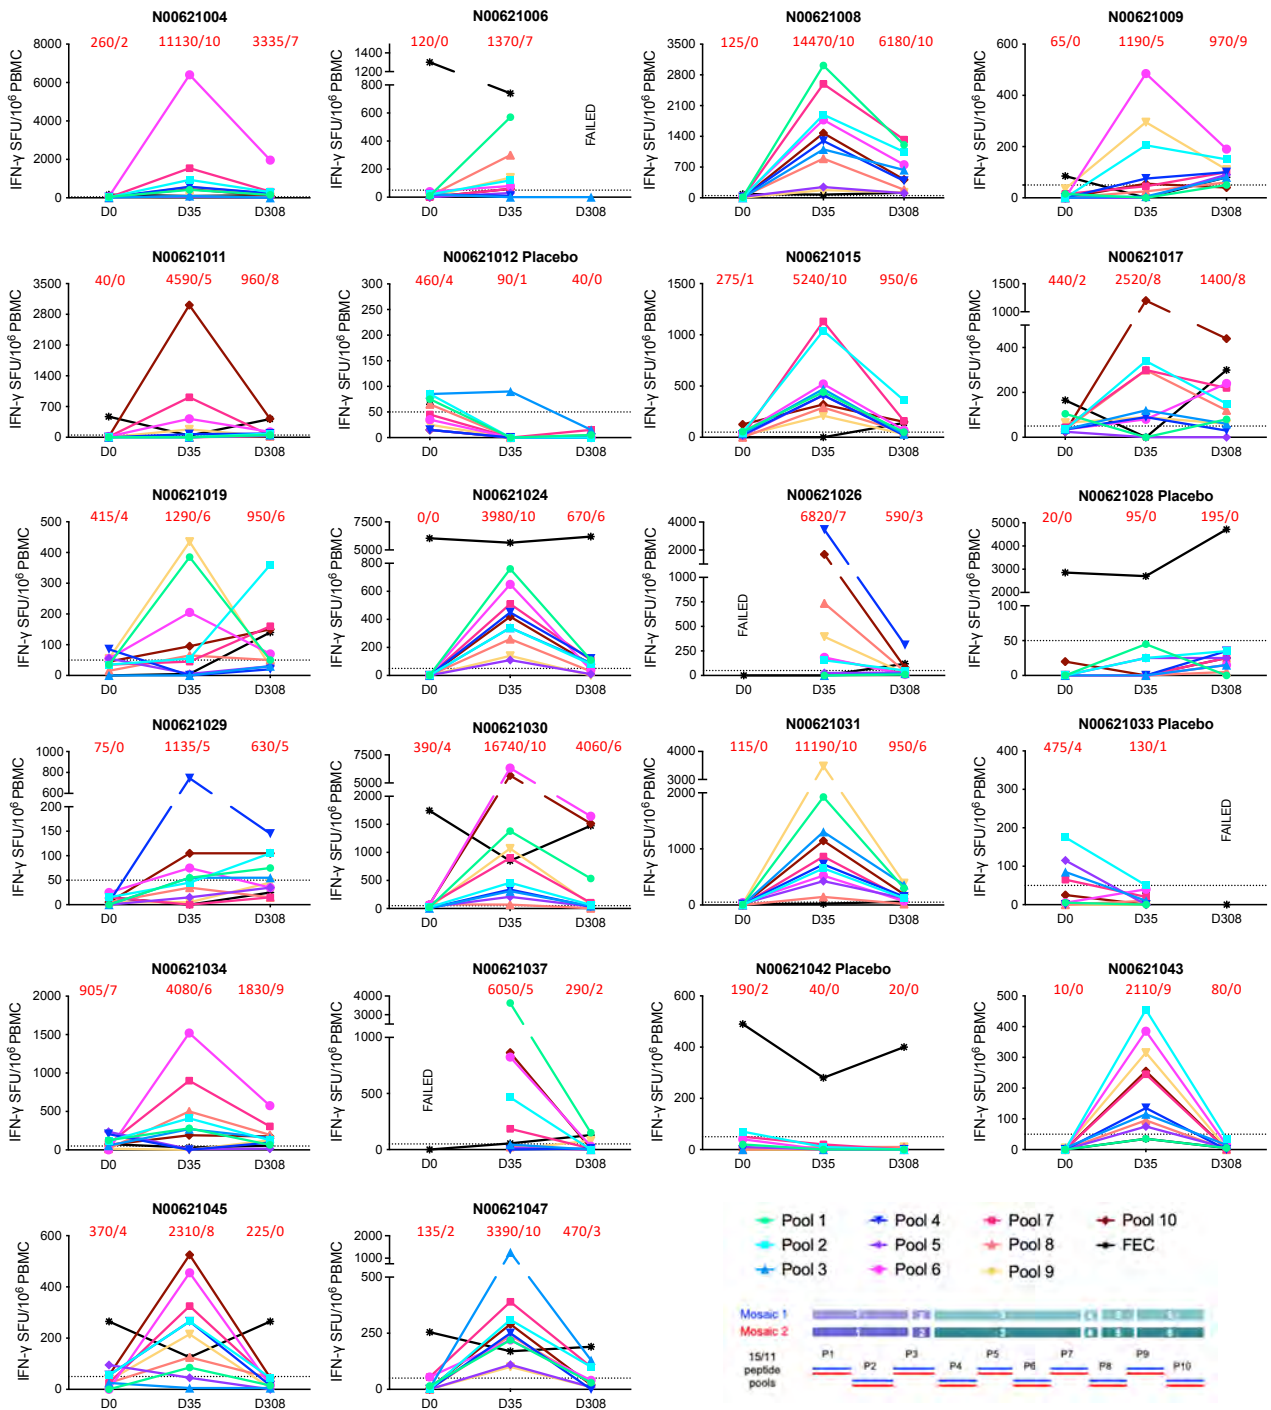

**Figure S1B:** Fresh IFN- $\gamma$  ELISPOT responses shown for individual study subjects (KWTRP)  
Continued.

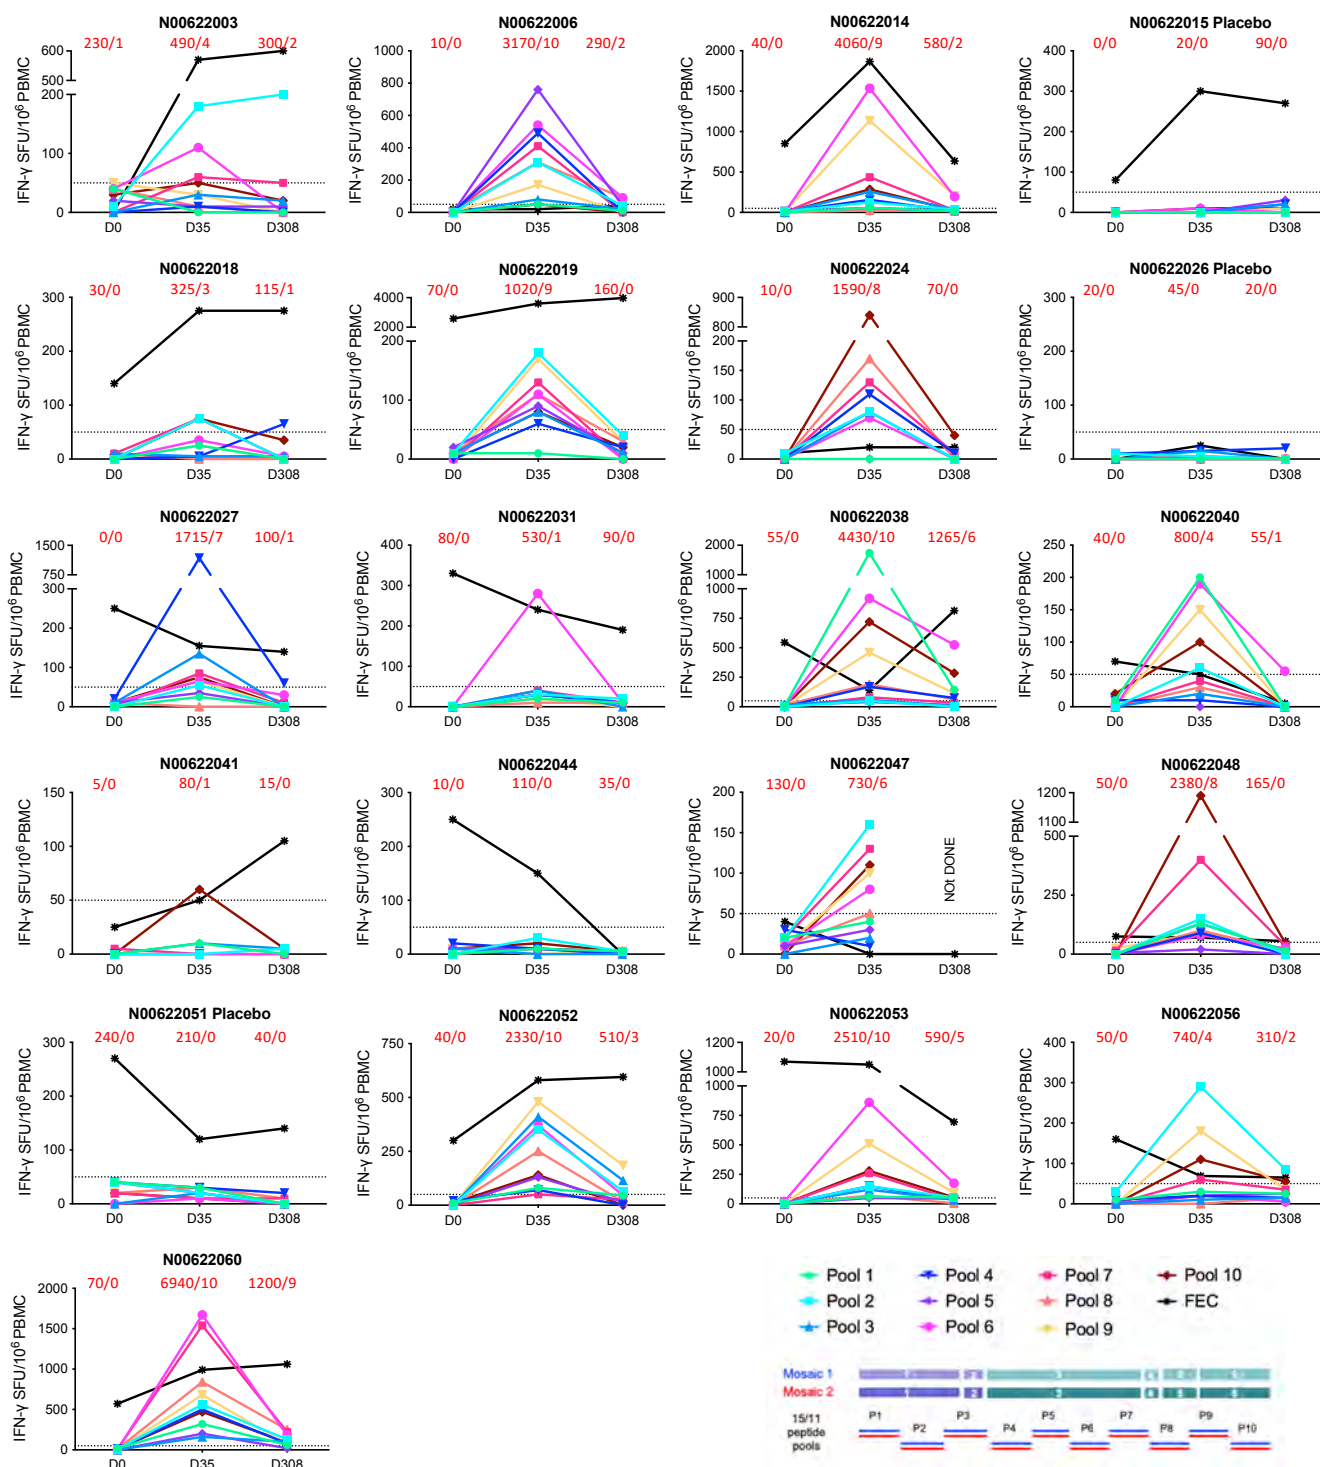

**Figure S1C: Fresh IFN-γ ELISPOT responses shown for individual study subjects (KAVI-ICR)**  
Continued.

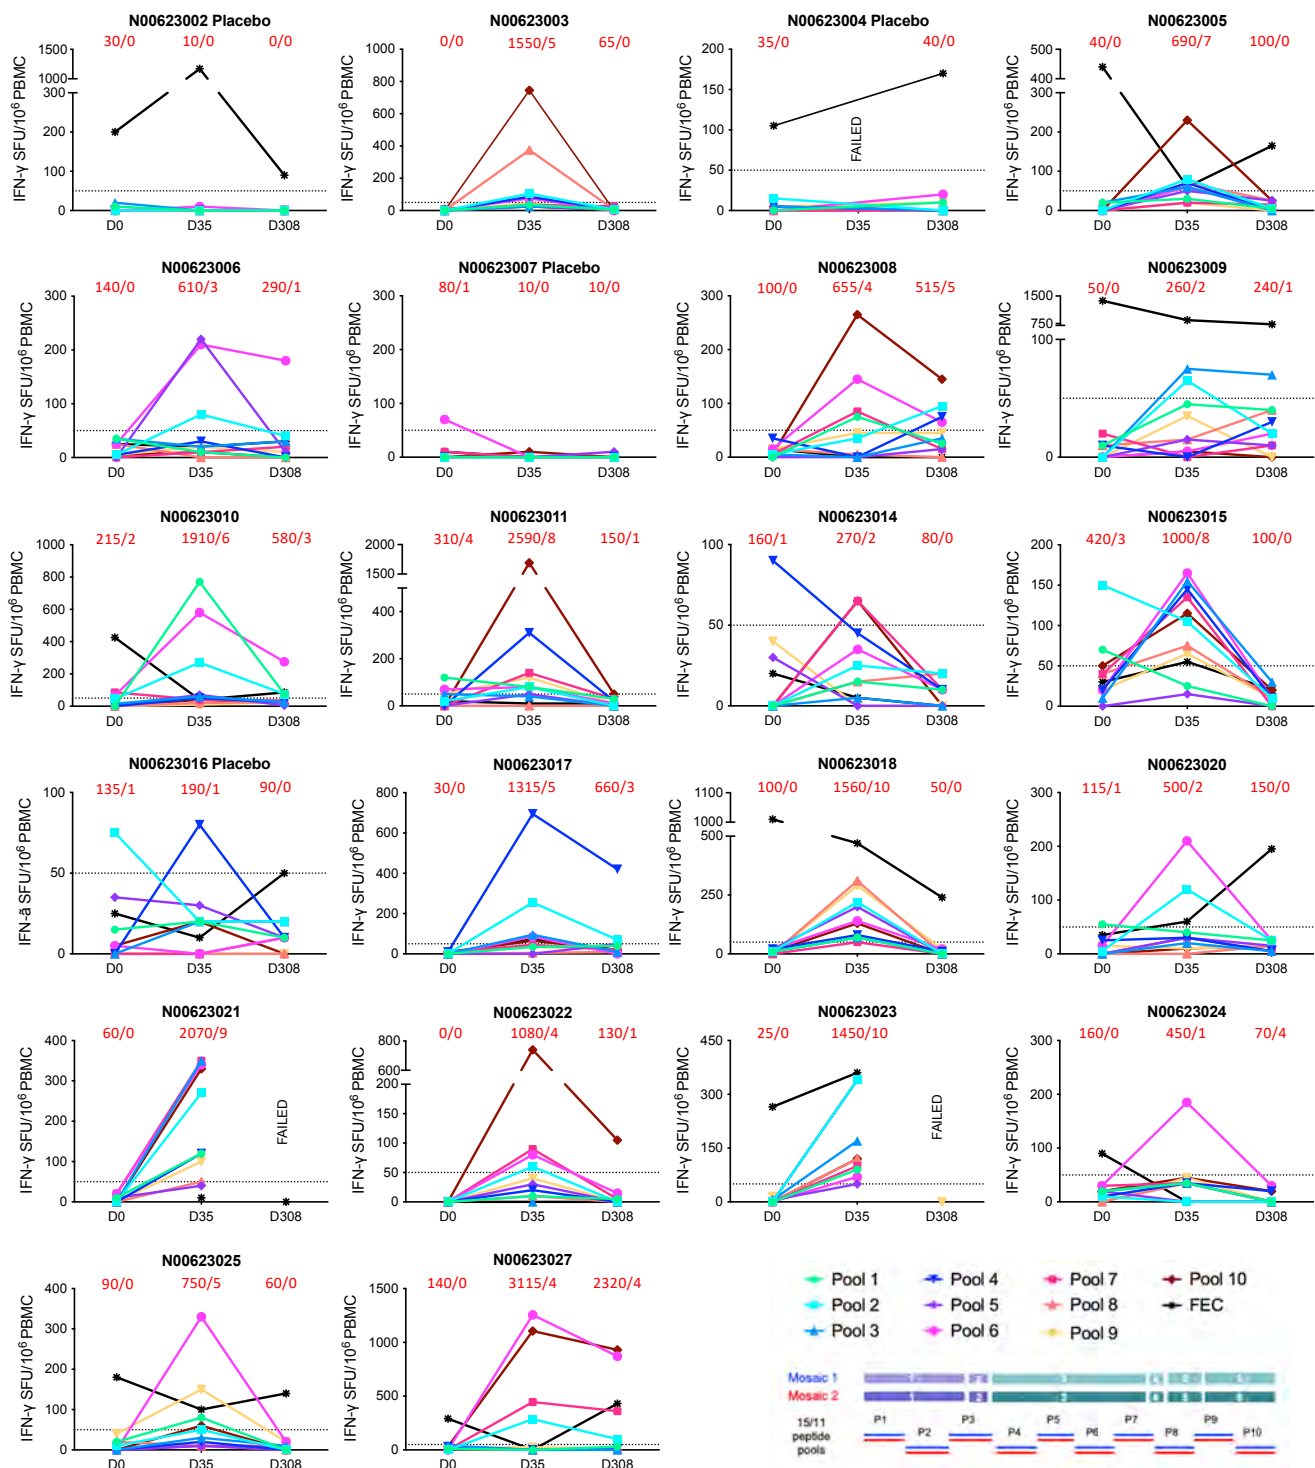



## MUL

N00619002 N00619004 N00619005 N00619009 N00619021 N00619022 N00619026 N00619033 N00619034 N00619039 N00619041 N00619042  
HLA-A 29:02/66:01 02:01/30:02 02:02/02:02 02:01/30:02 03:01/68:02 29:01/68:02 66:02/68:02 74:01/74:01 02:01/30:02 29:01/29:02 01:01/74:03 36:01/74:01  
HLA-B 07:02/57:03 08:01/15:03 51:01/58:02 42:01/45:01 07:02/49:01 53:01/56:01 13:02/13:02 58:02/58:02 49:01/57:02 37:01/81:01 39:01/76:01 45:01/53:01  
HLA-C 07:01/07:02 02:10/07:01 06:02/16:01 16:01/17:01 07:01/7:02 01:02/04:01 06:02/06:02 06:02/06:02 07:01/18:02 04:01/07:01 04:01/12:03 04:01/06:02

## Peptide Sequences

|                                                 |      |    |      |      |      |      |      |      |      |      |      |      |      |      |
|-------------------------------------------------|------|----|------|------|------|------|------|------|------|------|------|------|------|------|
| C003 NLQGMVHQASPRIT/C004 NAQGMVHQALSPRT         | Gag1 | P1 | 1038 | 100  | 713  | 125  | 0    | ND   | 0    | 100  | 63   | 1288 | ND   | 313  |
| C005 QMWHQASPRITLNAW/C006 QMWHQASPRITLNAW       |      |    | 3063 | 313  | 250  | 200  | 0    | ND   | 13   | 75   | 2925 | 700  | ND   | 250  |
| C007 QASPRITLNAWVKV/C008 QASPRITLNAWVKV         |      |    | 1288 | 0    | 213  | 100  | 1513 | ND   | 138  | 400  | 675  | 513  | ND   | 200  |
| C011 NAWWVKEEAFSPREC012 NAWWVKEEAFSPREC         |      |    | 475  | 63   | 863  | 63   | 0    | ND   | 0    | 263  | 113  | 538  | ND   | 213  |
| C013 KVKEEAFSPVPM/C014 KVKEEAFSPVPM             |      |    | 588  | 1738 | 300  | 163  | 13   | ND   | 0    | 213  | 213  | 163  | ND   | 0    |
| C015 EKAFSPVPMFMTAL/C016 EKAFSPVPMFMTAL         |      |    | 4663 | 1088 | 0    | 13   | 313  | ND   | 0    | 0    | 50   | 138  | ND   | 50   |
| C017 SPEVPMFMTALSEGA/C018 SPEVPMFMTALSEGA       |      |    | 0    | 4350 | 388  | 175  | 0    | ND   | 0    | 0    | 0    | 563  | ND   | 100  |
| C027 NTMLNTVGGHQAQAMQ/C028 NMLNVLGGHQAQAMQ      |      |    | 188  | 0    | 775  | 163  | 0    | ND   | 0    | 0    | 125  | 300  | ND   | 150  |
| C039 AAEWDVDPVPHAGP/C040 AAEWDVDPVPHAGP         |      |    | 200  | 350  | 950  | 180  | ND   | 0    | 0    | 138  | 250  | 450  | ND   | 288  |
| C041 DRVPHVPHAGP/C042 DRVPHVPHAGP               |      |    | 0    | 1025 | 350  | 113  | 0    | ND   | 138  | 488  | 275  | 200  | ND   | 238  |
| C043 PVHAGPIAPGQMRP/C044 PVHAGPIPPGQMRP         |      |    | 0    | 219  | 2913 | 0    | 50   | 0    | 63   | 863  | 100  | 113  | 0    | 156  |
| C047 PGQMRPREGSDIAGT/C048 REPRGSDIAGTSTL        |      |    | 256  | 4963 | 0    | 25   | 0    | 0    | 700  | 87   | 63   | 44   | 0    | 0    |
| C062 PVGDYIKRWILGLN/C063 PVGEYIKRWILGLN         |      |    | 294  | 3188 | 0    | 263  | 0    | 188  | 250  | 175  | 663  | 19   | 2594 | 19   |
| C064 IYKRWILGLNKIVR/C065 IYKRWILGLNKIVR         |      |    | 1019 | 1513 | 0    | 238  | 0    | 588  | 163  | 75   | 688  | 19   | 0    | 69   |
| C068 GLNKIVRMSPSL/C069 GLNPSPHETP               |      |    | 844  | 388  | 175  | 75   | 0    | 1488 | 288  | 900  | 138  | 269  | 331  | 144  |
| C070 IYRMSPSLDIRQ/C071 IYRMSPSLDIRQ             |      |    | 381  | 0    | 0    | 238  | 0    | 238  | 0    | 0    | 150  | 0    | 0    | 0    |
| C072 YSPSLDIRQGPKE/C073 YSPSLDIRQGPKE           |      |    | 381  | 0    | 88   | 0    | 0    | 538  | 0    | 812  | 138  | 269  | 0    | 56   |
| C074 SILDIRQGPKEPFRD/C075 SILDIRQGPKEPFRD       |      |    | 1931 | 0    | 250  | 25   | 0    | 0    | 362  | 0    | 231  | 0    | 94   | 94   |
| C078 PKEPFRDVRFFCT/C079 PKEPFRDVRFFCT           |      |    | 81   | 0    | 300  | 75   | 0    | 738  | 925  | 0    | 13   | 169  | 169  | 194  |
| C080 FRDVRFFCTLRAE/C081 FRDVRFFCTLRAE           |      |    | 606  | 188  | 313  | 13   | 0    | 138  | 88   | 25   | 275  | 0    | 1569 | 94   |
| C082 VDFRFFCTLRAEQATQ/C083 VDFRFFCTLRAEQATQ     |      |    | 869  | 1113 | 2575 | 163  | 0    | 725  | 1513 | 975  | 1538 | 94   | 4869 | 119  |
| C084 FKTLLRAEQATQVKNWMT/C085 FKTLLRAEQATQVKNWMT |      |    | 94   | 94   | 54   | 0    | 0    | 700  | 713  | 150  | 900  | 0    | 0    | 31   |
| C086 RAEQATQVKNWMT/C087 RAEQATQVKNWMT           |      |    | 281  | 0    | 0    | 38   | 0    | 638  | 800  | 0    | 25   | 144  | 0    | 0    |
| C088 ATQEVKNWMTDLL/C089 ASQEVKNWMTDLL           |      |    | 906  | 0    | 0    | 0    | 0    | 400  | 288  | 175  | 0    | 0    | 0    | 0    |
| C092 MDTLLVQANPDCX/C093 MDTLLVQANPDC            |      |    | 531  | 1938 | 375  | 0    | 425  | 0    | 0    | 0    | 0    | 119  | 0    | 0    |
| C100 LLVQANPDCITLR/C095 LLVQANPDCITLR           |      |    | 556  | 2725 | 125  | 0    | 0    | 0    | 356  | 850  | 0    | 181  | 225  | 0    |
| C104 IRLAGPALTLEEM/C101 IRLAGPALTLEEM           |      |    | 844  | 2738 | 0    | 44   | 838  | 350  | 0    | 0    | 31   | 325  | 0    | 0    |
| C102 LGGPALTLEEMTACQ/C103 LGGPALTLEEMTACQ       |      |    | 606  | 2738 | 0    | 75   | 0    | 419  | 0    | 0    | 0    | 0    | 0    | 0    |
| C111/CGKEGHAKNCRAPR/C112/CGKEGHAKNCRAPR         |      |    | 544  | 38   | 0    | 56   | 238  | 775  | 856  | 0    | 75   | 281  | 0    | 0    |
| C113 GHAKNCRAPRRCG/C114 GHAKNCRAPRRCG           |      |    | 556  | 663  | 1113 | 0    | 425  | 225  | 469  | 0    | 0    | 469  | 238  | 0    |
| C115 KNCRAPRRCGKC/C116 KNCRAPRRCGKC             |      |    | 856  | 188  | 125  | 69   | 13   | 463  | 0    | 75   | 0    | 156  | 250  | 87.5 |
| C129 ANFLGKWPCHKGRP/C130 ANFLGKWPCHKGRP         |      |    | 1344 | 625  | 1950 | 619  | 25   | 13   | 1831 | 1138 | 0    | 106  | 100  | 0    |
| C131 GKWPCHKGRPGL/C132 GKWPCHKGRPGL             |      |    | 1206 | 0    | 0    | 19   | 0    | 538  | 69   | 813  | 0    | 19   | 0    | 0    |
| C135 GRPCHKGRPGL/C136 GRPCHKGRPGL               |      |    | 844  | 2975 | 0    | 6    | 6    | 38   | 0    | 738  | 56   | 300  | 0    | 0    |
| C139 LQPKWPKMIGGIG/C140 LQPKWPKMIGGIG           |      |    | 0    | 0    | 0    | 69   | 175  | ND   | 1113 | 275  | 175  | 644  | 200  | ND   |
| C141 WPKMIGGIGFV                                |      |    | 725  | 1044 | 594  | 744  | 63   | ND   | 863  | 513  | 263  | 956  | 338  | ND   |
| C142 MIGGIGFVKKQD/C143 MIGGIGFVKKQD             |      |    | 0    | 0    | 0    | 656  | 350  | ND   | 525  | 1038 | 525  | 431  | 100  | ND   |
| C144 IGGFVKKQDQDQ/C145 IGGFVKKQDQDQ             |      |    | 0    | 0    | 406  | 231  | 338  | ND   | 163  | 838  | 175  | 319  | 88   | ND   |
| C146 IKVQDQDQIEG/C147 IKVQDQDQIEG               |      |    | 0    | 0    | 1531 | 206  | 413  | ND   | 413  | 863  | 288  | 0    | 138  | ND   |
| C148 QDQDQDQIEG/C149 QDQDQDQIEG                 |      |    | 0    | 0    | 0    | 31   | 188  | ND   | 513  | 213  | 313  | 0    | 0    | ND   |
| C150 ILUQDQDQIEG/C151 ILUQDQDQIEG               |      |    | 0    | 0    | 169  | 131  | 50   | ND   | 275  | 488  | 113  | 63   | ND   | 0    |
| C154 KAIGTVLGGTPV/C155 KAIGTVLGGTPV             |      |    | 0    | 0    | 756  | 81   | 0    | ND   | 838  | 0    | 288  | 306  | 188  | ND   |
| C156 TVLGGTPVNIGRN/C157 TVLGGTPVNIGRN           |      |    | 113  | 0    | 794  | 106  | 113  | ND   | 925  | 300  | 375  | 669  | 150  | ND   |
| C158 GTPVNIGRNMLTQ/C159 GTPVNIGRNMLTQ           |      |    | 0    | 0    | 0    | 6    | 0    | ND   | 650  | 825  | 738  | 194  | 3938 | ND   |
| C160 VNIGRNMLTQCT/C161 VNIGRNMLTQCT             |      |    | 0    | 0    | 144  | 44   | 238  | ND   | 525  | 538  | 250  | 206  | 25   | ND   |
| C162 GRNMLTQCTLNP/C163 GRNMLTQCTLNP             |      |    | 0    | 0    | 0    | 44   | 238  | ND   | 113  | 263  | 263  | 44   | 38   | ND   |
| C166 GCTLNPSPHETP/C167 GCTLNPSPHETP             |      |    | 250  | 0    | 6    | 6    | 1838 | ND   | 25   | 88   | 125  | 0    | 175  | ND   |
| C168 NFPSPHETPVTL/C169 NFPSPHETPVTL             |      |    | 238  | 0    | 0    | 556  | 2563 | ND   | 425  | 213  | 100  | 0    | 1450 | ND   |
| C170 SPDIOTPVTLKPGMD/C171 SPDIOTPVTLKPGMD       |      |    | 0    | 0    | 0    | 1369 | 0    | ND   | 213  | 0    | 25   | 0    | 5200 | ND   |
| C172 TYPVTLKPGMDGPR/C173 TYPVTLKPGMDGPR         |      |    | 0    | 0    | 0    | 56   | 0    | ND   | 338  | 188  | 138  | 519  | 250  | ND   |
| C174 TLKPGMDGPRVKNWP/C175 TLKPGMDGPRVKNWP       |      |    | 0    | 0    | 0    | 0    | 0    | ND   | 100  | 175  | 263  | 0    | 300  | ND   |
| C176 GMDGPRVKNWPLTE/C177 GMDGPRVKNWPLTE         |      |    | 0    | 0    | 0    | 231  | 0    | ND   | 88   | 0    | 175  | 0    | 225  | ND   |
| C178 PRKQWPLTEK/C179 PRKQWPLTEK                 |      |    | 0    | 0    | 0    | 88   | ND   | ND   | 175  | 0    | 0    | 144  | 338  | ND   |
| C182 TEKKIKALTECKEM/C183 TEKKIKALTECKEM         |      |    | 369  | 406  | 450  | 106  | 550  | 0    | 950  | 200  | 0    | 681  | 0    | 81   |
| C184 IKALTECKEMKEG/C185 IKALTECKEMKEG           |      |    | 94   | 406  | 563  | 106  | 325  | 0    | 938  | 575  | 50   | 306  | 0    | 144  |
| C186 TECKEMKEGKIG/C187 TECKEMKEGKIG             |      |    | 419  | 169  | 400  | 169  | 300  | 0    | 1175 | 88   | 25   | 131  | 0    | 94   |
| C188 KEMKEGKIGKIG/C189 KEMKEGKIGKIG             |      |    | 0    | 6    | 2100 | 56   | 438  | 0    | 1338 | 25   | 50   | 306  | 0    | 19   |
| C190 KEGKIGKIGPENPN/C191 KEGKIGKIGPENPN         |      |    | 0    | 31   | 1950 | 19   | 88   | 0    | 588  | 13   | 13   | 219  | 575  | 194  |
| C192 TIKGKIGPENPN/C193 TIKGKIGPENPN             |      |    | 331  | 44   | 538  | 69   | 0    | 0    | 1150 | 200  | 13   | 331  | 0    | 44   |
| C194 GRPNPNTPVFAKK/C195 GRPNPNTPVFAKK           |      |    | 94   | 0    | 150  | 81   | 75   | 0    | 1213 | 475  | 25   | 131  | 0    | 31   |
| C196 PNPNTPIFAIKKDS/C197 PNPNTPIFAIKKDS         |      |    | 156  | 4894 | 350  | 206  | 38   | 0    | 1238 | 713  | 25   | 0    | 2563 | 188  |
| C198 PIFAIKKDSKWRK/C199 PIFAIKKDSKWRK           |      |    | 0    | 8069 | 913  | 231  | 600  | 163  | 1550 | 1125 | 163  | 494  | 5125 | 94   |
| C200 IKKDSKWRKLVDF/C201 IKKDSKWRKLVDF           |      |    | 469  | 319  | 175  | 306  | 763  | 0    | 1663 | 525  | 50   | 331  | 0    | 119  |
| C202 DSTKWRKLVDFREL/C203 DSTKWRKLVDFREL         |      |    | 606  | 81   | 825  | 431  | 600  | 0    | 1538 | 375  | 138  | 0    | 0    | 156  |
| C204 WRKLVDFRELNRKTQ/C205 WRKLVDFRELNRKTQ       |      |    | 0    | 5681 | 2325 | 269  | 475  | 0    | 1413 | 838  | 213  | 0    | 2900 | 231  |
| C206 VDFRELNRKTQVDF/C207 VDFRELNRKTQVDF         |      |    | 0    | 5694 | 738  | 356  | 175  | 0    | 825  | 0    | 13   | 456  | 775  | 106  |
| C208 ELNKRTQDFWEVQLG/C209 ELNKRTQDFWEVQLG       |      |    | 269  | 106  | 50   | 94   | 0    | 0    | 600  | 813  | 25   | 394  | 713  | 69   |
| C210 KTQDFWEVQLGPH/C211 RTQDFWEVQLGPH           |      |    | 144  | 1869 | 0    | 31   | 88   | 0    | 825  | 738  | 13   | 206  | 0    | 31   |
| C212 FWEVQLGPHAGLK/C213 FWEVQLGPHAGLK           |      |    | 0    | 906  | 513  | 44   | 0    | 0    | 1088 | 850  | 150  | 6    | 0    | 106  |
| C214 QLGHIPAGLKKK/C215 QLGHIPAGLKKK             |      |    | 0    | 0    | 538  | 144  | 38   | 0    | 425  | 838  | 38   | 0    | 0    | 206  |
| C216 PHPAGLKKKSVTL/C217 PHPAGLKKKSVTL           |      |    | 0    | 0    | 1000 | 131  | 200  | 0    | 913  | 650  | 0    | 0    | 0    | 81   |
| C218 GLKKKSVTLVDSD/C219 GLKKKSVTLVDSD           |      |    | 156  | 0    | 2263 | 244  | 1438 | 0    | 1075 | 638  | 0    | 244  | 413  | 144  |
| C220 KRSVTLVDSDG/C221 KRSVTLVDSDG               |      |    | 531  | 0    | 338  | 0    | 0    | 0    | 1244 | 0    | 250  | 63   | ND   | 25   |
| C222 TVLVDSDGAFVPLD                             |      |    | 31   | 0    | 363  | 0    | 375  | 0    | 1544 | 0    | 388  | 125  | ND   | 0    |
| C224 VGDYFVPLDEFRC/C225 VGDYFVPLDEFRC           |      |    | 569  | 0    | 550  | 6    | 1113 | 0    | 1481 | 381  | 88   | 138  | ND   | 313  |
| C226 YFVPLDEFRCFKY/C227 YFVPLDEFRCFKY           |      |    | 344  | 0    | 875  | 6    | 450  | 0    | 1594 | 206  | 100  | 88   | ND   | 0    |
| C228 PLDEFRCFKYFTAP/C229 PLDEFRCFKYFTAP         |      |    | 519  | 0    | 175  | 6    | 2488 | 0    | 431  | 0    | 250  | 150  | ND   | 13   |
| C230 SFRKYFTAPISN/C231 SFRKYFTAPISN             |      |    | 756  | 0    | 888  | 69   | 3425 | 0    | 269  | 0    | 588  | 138  | ND   | 0    |
| C232 YKFTAPISNETP/C233 YKFTAPISNETP             |      |    | 619  | 0    | 850  | 0    | 313  | 0    | 206  | 0    | 0    | 0    | ND   | 100  |
| C236 INNETPGRVQVYV/C237 INNETPGRVQVYV           |      |    | 294  | 2625 | 275  | 444  | 1150 | 0    | 1644 | 1456 | 300  | 388  | ND   | 38   |
| C238 TPGRYQVNLPGQW/C239 TPGRYQVNLPGQW           |      |    | 469  | 1600 | 513  | 369  | 350  | 0    | 644  | 1156 | 188  | 300  | ND   | 263  |
| C242 NVLPQGWKSPAFQ/C243 NVLPQGWKSPAFQ           |      |    | 406  | 0    | 1238 | 631  | 725  | 7768 | 956  | 0    | 163  | 263  | ND   | 50   |
| C244 QGWKSPAFQSSMT/C245 QGWKSPAFQSSMT           |      |    | 394  | 0    | 488  | 0    | 650  | 0    | 919  | 231  | 325  | 225  | ND   | 0    |
| C246 GSPAFQSSMTILK/C247 GSPAFQSSMTILK           |      |    | 406  | 0    | 363  | 119  | 225  | 0    | 856  | 0    | 13   | 138  | ND   | 13   |
| C254 FRANKPENYQMD/C255 FRANKPENYQMD             |      |    | 0    | 0    | 400  | 0    | 25   | 0    | 931  | 0    | 113  | 0    | ND   | 13   |
| C256 NPEVYQMDLYV/C257 NPEVYQMDLYV               |      |    | 0    | 4600 | 1150 | 644  | 875  | 563  | 406  | 0    | 2363 | 238  | ND   | 0    |
| C258 VYQMDLYVGSOL/C259 VYQMDLYVGSOL             |      |    | 0    | 5325 | 1438 | 944  | 850  | 800  | 906  | 0    | 2513 | 0    | ND   | 0    |
| C260 YMDLYVGSOL/C261 YMDLYVGSOL                 |      |    | 0    | 2    |      |      |      |      |      |      |      |      |      |      |

**Figure S2B: Volunteers' HLA class I and peptide pair mapping by STCL (KWTRP)**

| KAVI-ICR          |    |                                                 | N00622003         | N00622006   | N00622014   | N00622015   | N00622019   | N00622024   | N00622026   | N00622027   | N00622044   | N00622047   | N00622048   | N00622051   |
|-------------------|----|-------------------------------------------------|-------------------|-------------|-------------|-------------|-------------|-------------|-------------|-------------|-------------|-------------|-------------|-------------|
|                   |    |                                                 | HLA-A 01:01/02:01 | 02:05/68:02 | 02:01/02:01 | 03:01/29:02 | 02:01/02:01 | 30:01/66:01 | 23:01/30:01 | 02:05/68:02 | 03:01/03:01 | 36:01/66:01 | 30:02/68:02 | 30:04/36:01 |
|                   |    |                                                 | HLA-B 15:03/27:26 | 15:10/40:12 | 15:03/53:01 | 15:10/35:01 | 45:01/53:01 | 42:01/58:02 | 42:01/81:01 | 07:02/58:01 | 47:03/49:01 | 53:01/58:02 | 15:10/42:01 | 45:01/58:02 |
|                   |    |                                                 | HLA-C 02:02/02:10 | 03:04/04:04 | 02:10/04:01 | 03:04/04:01 | 04:01/16:01 | 06:02/17:01 | 17:01/18:01 | 07:01/07:02 | 07:01/07:01 | 06:02/06:02 | 03:04/17:01 | 08:02/16:01 |
| Peptide Sequences |    |                                                 |                   |             |             |             |             |             |             |             |             |             |             |             |
| Gag1              | P1 | C003 NLQSGMVHQAISPR/C004 NAQGMQMVHQAISPR        | 125               | 63          | 0           | 0           | 0           | 1050        | 0           | 0           | 225         | 0           | 275         | 0           |
|                   |    | C005 QMVHQAISPR/LNAW/C006 QMVHQAISPR/LNAW       | 0                 | 38          | 0           | 0           | 0           | 2388        | 0           | 225         | 188         | 0           | 425         | 0           |
|                   |    | C007 QAISPR/LNAW/VKVI/C008 QALSPRT/LNAW/VKVI    | 13                | 25          | 138         | 0           | 0           | 1000        | 63          | 313         | 0           | 0           | 313         | 0           |
|                   |    | C009 PRT/LNAW/VKVEKA/C010 PRT/LNAW/VKVEKA       | 113               | 38          | 238         | 0           | 0           | 1050        | 0           | 0           | 0           | 0           | 100         | 0           |
|                   |    | C023 EGATPQDNLMTLNT/C024 EGATPQDNLMTLNT         | 175               | 50          | 0           | 0           | 0           | 775         | 25          | 0           | 25          | 0           | 638         | 0           |
|                   |    | C029 NTVGGHQAAMQMLK/C030 NTVGGHQAAMQMLKE        | 100               | 38          | 500         | 0           | 0           | 1300        | 0           | 938         | 188         | 0           | 363         | 0           |
|                   |    | C039 AAEDVRRVHPVHAGPI/C040 AAEDVRRVHPVHAGPI     | 150               | 50          | 563         | 0           | 0           | 1400        | 0           | 0           | 125         | 0           | 188         | 0           |
|                   |    | C047 PGQMRPRGSDIAGT                             | 150               | 0           | 81          | 463         | 1394        | 0           | 0           | 0           | 0           | 0           | 56          | 0           |
|                   |    | C048 REPRGSDIAGT/ISNL/C049 REPRGSDIAGT/ISLT     | 138               | 0           | 319         | 75          | 2806        | 0           | 0           | 0           | 88          | 0           | 0           | 0           |
|                   |    | C052 AGT/ISLT/LEQI/GWMT/C053 AGT/ISLT/LEQI/GWMT | 0                 | 0           | 1056        | 0           | 0           | 0           | 0           | 0           | 25          | 0           | 0           | 0           |
| Gag2              | P2 | C056 EQI/GWMT/SPNP/PIV/C057 EQI/GWMT/SPNP/PIV   | 100               | 0           | 0           | 0           | 0           | 0           | 0           | 0           | 38          | 1400        | 369         | 0           |
|                   |    | C062 PVGI/YKRWI/LGLN/C063 PVGI/YKRWI/LGLN       | 0                 | 4225        | 581         | 0           | 6256        | 0           | 0           | 0           | 0           | 3013        | 119         | 0           |
|                   |    | C064 IYKRWI/LGLN/KIVR/C065 IYKRWI/LGLN/KIVR     | 688               | 788         | 919         | 0           | 3481        | 250         | 0           | 0           | 0           | 2638        | 0           | 0           |
|                   |    | C066 WIILGLN/KIVRM/SP/C067 WIILGLN/KIVRM/SP     | 300               | 200         | 1494        | 0           | 1194        | 2288        | 0           | 0           | 263         | 613         | 119         | 0           |
|                   |    | C068 GLN/KIVRM/SP/ISL/C069 GLN/KIVRM/SP/ISL     | 150               | 13          | 1944        | 438         | 494         | 325         | 25          | 0           | 0           | 0           | 431         | 0           |
|                   |    | C070 IYRM/SP/ISL/DIQ/C071 IYRM/SP/ISL/DIQ       | 0                 | 0           | 1344        | 0           | 656         | 0           | 0           | 81          | 0           | 0           | 31          | 0           |
|                   |    | C072 YSP/ISL/DIQ/GPK/C073 YSP/ISL/DIQ/GPK       | 88                | 0           | 1356        | 200         | 294         | 0           | 75          | 544         | 213         | 0           | 0           | 0           |
|                   |    | C078 PKPEFRD/VDFR/KTC/C079 PKPEFRD/VDFR/KTC     | 150               | 50          | 1631        | 63          | 419         | 0           | 0           | 0           | 125         | 0           | 119         | 0           |
|                   |    | C080 FRD/VDFR/KTLRAE/C081 FRD/VDFR/KTLRAE       | 700               | 0           | 1381        | 0           | 606         | 375         | 0           | 206         | 63          | 0           | 0           | 0           |
|                   |    | C082 VDFR/KTLRAE/QATQ/C083 VDFR/KTLRAE/QASQ     | 3375              | 0           | 481         | 0           | 369         | 1063        | 0           | 0           | 863         | 1688        | 81          | 0           |
| Gag2              | P3 | C084 FKT/LRAEQATQEVKN/C085 YKTLRAEQASQEVKN      | 538               | 0           | 1019        | 0           | 831         | 0           | 0           | 581         | 813         | 0           | 0           | 0           |
|                   |    | C086 RAEQATQEVKN/MTD/C087 RAEQASQEVKN/MTMTE     | 63                | 0           | 1444        | 0           | 281         | 0           | 0           | 781         | 338         | 0           | 519         | 0           |
|                   |    | C088 ATQEVKN/MTD/TLL/C089 ASQEVKN/MTMTE/TLL     | 38                | 0           | 1319        | 150         | 544         | 0           | 150         | 206         | 0           | 0           | 0           | 0           |
|                   |    | C094 LLVQANP/NDCKTLR/C095 LLVQANP/NDCKTLK       | 0                 | 0           | 263         | 69          | 969         | 0           | 0           | 0           | 0           | 25          | 350         | 0           |
|                   |    | C119 RGCWKGREGHQMKD/C120 KGCWKGREGHQMKD         | 0                 | 13          | 0           | 419         | 381         | 0           | 96          | 788         | 663         | 850         | 38          | 0           |
|                   |    | C129 ANFLGIWPSHGKRP/C130 ANFLGIWPSHGKRP         | 0                 | 63          | 13          | 306         | 0           | 744         | 283         | 0           | 1150        | 3575        | 325         | 350         |
|                   |    | C131 KGIWPSHGKRP/GNFI/C132 KGIWPSHGKRP/GNFI     | 0                 | 13          | 0           | 0           | 431         | 0           | 133         | 0           | 625         | 1450        | 0           | 0           |
|                   |    | C141 WPKMIGGIGF/KIV                             | 394               | 13          | 550         | 0           | 2481        | 779         | 163         | 644         | 238         | 613         | 0           | 550         |
|                   |    | C142 MIGGIGF/KIV/QYD/C143 MIGGIGF/KIV/QYD       | 431               | 13          | 138         | 131         | 1094        | 1517        | 125         | 0           | 263         | 713         | 163         | 688         |
|                   |    | C144 IGGF/KIV/QYD/QIL/C145 IGGF/KIV/QYD/QIL     | 294               | 0           | 188         | 119         | 1194        | 2954        | 125         | 881         | 225         | 375         | 0           | 450         |
| Pol3              | P4 | C146 IKV/QYD/QIL/IEIG/C147 IKV/QYD/QIL/IEIG     | 169               | 113         | 450         | 0           | 1419        | 1642        | 0           | 431         | 388         | 738         | 363         | 613         |
|                   |    | C148 QYD/QIL/IEIG/KAI/C149 QYD/QIL/IEIG/KAI     | ND                | 0           | 388         | 206         | 1094        | 804         | 0           | 556         | 75          | 500         | 538         | 788         |
|                   |    | C150 ILIEIG/KAI/GT/VL/C151 ILIEIG/KAI/GT/VL     | 44                | 463         | 438         | 0           | 1081        | 792         | 0           | 231         | 300         | 563         | 100         | 488         |
|                   |    | C152 ICGKAI/GT/VL/GPT/C153 ICGHAI/GT/VL/GPT     | 69                | 38          | 338         | 0           | 1306        | 954         | 0           | 131         | 13          | 138         | 0           | 0           |
|                   |    | C154 KAI/GT/VL/GPT/PVNI/C155 KAI/GT/VL/GPT/PVNI | 306               | 813         | 113         | 0           | 294         | 0           | 263         | 6094        | 13          | 300         | 0           | 0           |
|                   |    | C156 VL/GPT/PVNI/IGRN/C157 VL/GPT/PVNI/IGRN     | 419               | 688         | 625         | 119         | 494         | 604         | 0           | 5744        | 525         | 413         | 0           | 463         |
|                   |    | C158 GPT/PVNI/IGRN/MLT/C159 GPT/PVNI/IGRN/MLT   | 494               | 13          | 538         | 0           | 969         | 1854        | 125         | 194         | 213         | 975         | 0           | 513         |
|                   |    | C160 VNI/IGRN/MLT/Q/GCT/C161 VNI/IGRN/MLT/Q/GCT | 31                | 63          | 450         | 0           | 631         | 1204        | 75          | 219         | 63          | 363         | 150         | 0           |
|                   |    | C162 GRN/MLT/Q/GCT/LNF/C163 GRN/MLT/Q/GCT/LNF   | 81                | 25          | 213         | 6           | 481         | 1617        | 0           | 456         | 0           | 0           | 588         | 250         |
|                   |    | C164 LT/Q/GCT/LNF/ISPI/C165 LT/Q/GCT/LNF/ISPI   | 44                | 13          | 438         | 0           | 469         | 2467        | 0           | 419         | 25          | 363         | 0           | 0           |
| P5                | P5 | C166 GCT/LNF/ISPI/OTVP/C167 GCT/LNF/ISPI/OTVP   | 94                | 50          | 225         | 106         | 469         | 767         | 125         | 356         | 113         | 238         | 0           | 13          |
|                   |    | C174 TLKPGMDGPRVKQWP/C175 KLPKPGMDGPRVKQWP      | 231               | 13          | 0           | 0           | 244         | 1342        | 75          | 0           | 175         | 163         | 0           | 0           |
|                   |    | C176 GMDGPRVKQWP/LTEE/C177 GMDGPRVKQWP/LTEE     | 231               | 0           | 400         | 119         | 244         | 929         | 0           | 319         | 25          | 338         | 0           | 0           |
|                   |    | C178 PRVKQWP/LTEE/KAI/C179 PRVKQWP/LTEE/KAI     | 144               | 0           | 638         | 0           | 306         | 917         | 0           | 0           | 363         | 0           | 0           | 0           |
|                   |    | C184 IKALTECKEMEKEG/C185 IKALVEICTEMEKEG        | 69                | 25          | 0           | 119         | 0           | 1013        | 0           | 0           | 0           | 0           | 0           | 46          |
|                   |    | C188 KEMEKEG/KIGPE/C189 TEMEKEG/KISKIGPE        | 31                | 0           | 781         | 256         | 0           | 88          | 0           | 0           | 0           | 0           | 0           | 0           |
|                   |    | C196 PYNTP/FAIKKDDST/C197 PYNTP/FAIKKDDST       | 44                | 63          | 0           | 0           | 2075        | 213         | 0           | 0           | 0           | 200         | 0           | 0           |
|                   |    | C198 P/FAIKKDDST/KWRK/C199 P/FAIKKDDST/KWRK     | 31                | 388         | 0           | 69          | 3425        | 675         | 300         | 569         | 50          | 1738        | 31          | 0           |
|                   |    | C200 IKKKDST/KWRK/LVDF/C201 IKKKDST/KWRK/LVDF   | 106               | 38          | 69          | 206         | 0           | 788         | 88          | 281         | 0           | 438         | 0           | 8           |
|                   |    | C202 DST/KWRK/LVDF/REL/C203 DST/KWRK/LVDF/REL   | 419               | 663         | 0           | 144         | 0           | 788         | 288         | 0           | 775         | 0           | 0           | 0           |
| P6                | P6 | C204 WRK/LVDF/REL/NKQT/C205 WRK/LVDF/REL/NKQT   | 231               | 7125        | 0           | 119         | 25          | 1038        | 50          | 0           | 550         | 0           | 0           | 133         |
|                   |    | C208 ELNKKQT/DFWEVLG/C209 ELNKKQT/DFWEVLG       | 231               | 13          | 0           | 206         | 25          | 900         | 0           | 0           | 0           | 38          | 0           | 0           |
|                   |    | C218 GLKSVTVL/DVGD/C219 GLKSVTVL/DVGD           | 31                | 213         | 0           | 0           | 0           | 1325        | 113         | 0           | ND          | 0           | 606         | 733         |
|                   |    | C220 KSVTVL/DVGD/DAF/C221 KSVTVL/DVGD/DAF       | 0                 | 25          | 0           | 50          | 463         | 988         | 238         | 106         | 0           | 450         | 544         | 238         |
|                   |    | C222 TL/DVGD/DAF/PLD/C223 TL/DVGD/DAF/PLD       | 206               | 100         | 256         | 400         | 500         | 1875        | 263         | 444         | 200         | 713         | 481         | 663         |
|                   |    | C224 VGD/DAF/PLD/KDFR/C225 VGD/DAF/PLD/KDFR     | 119               | 150         | 244         | 150         | 1075        | 1988        | 488         | 256         | 363         | 675         | 1031        | 513         |
|                   |    | C226 VSVPLD/DFSRKYTA/C227 VSVPLD/DFSRKYTA       | 44                | 138         | 556         | 225         | 538         | 2550        | 650         | 194         | 0           | 1075        | 1131        | 325         |
|                   |    | C228 PLD/DFSRKYTAFITP/C229 PLD/DFSRKYTAFITP     | 81                | 175         | 381         | 463         | 713         | 2375        | 475         | 906         | 113         | 763         | 694         | 313         |
|                   |    | C230 SFRKYTAFITP/ISIN/C231 DFRKYTAFITP/ISIN     | 1206              | 63          | 3131        | 563         | 588         | 1163        | 375         | 256         | 0           | 1138        | 781         | 425         |
|                   |    | C232 YTAFTIP/ISIN/NETPG/C233 YTAFTIP/ISIN/NETPG | 494               | 75          | 2569        | 263         | 375         | 588         | 275         | 544         | 225         | 625         | 744         | 338         |
| P7                | P7 | C234 TIPSINNETPG/IRYQ/C235 TIPSINNETPG/IRYQ     | 31                | 50          | 256         | 463         | 613         | 438         | 150         | 44          | 0           | 800         | 806         | 238         |
|                   |    | C236 INNETPG/IRYQ/VNVL/C237 INNETPG/IRYQ/VNVL   | 0                 | 38          | 119         | 150         | 263         | 325         | 450         | 519         | 63          | 588         | 294         | 438         |
|                   |    | C238 TPGIRYQ/VNVL/PQGW/C239 TPGIRYQ/VNVL/PQGW   | 31                | 113         | 769         | 225         | 1300        | 2200        | 225         | 406         | 875         | 813         | 656         | 425         |
|                   |    | C240 RYQ/VNVL/PQGW/GSP/C241 RYQ/VNVL/PQGW/GSP   | 181               | 225         | 644         | 50          | 1188        | 1988        | 363         | 531         | 788         | 513         | 1081        | 63          |
|                   |    | C242 NVL/PQGW/GSP/PAIFQ/C243 NVL/PQGW/GSP/PAIFQ | 44                | 25          | 494         | 75          | 200         | 1013        | 500         | 444         | 288         | 0           | 1019        | 763         |
|                   |    | C244 QGW/GSP/PAIFQSSMT/C245 QGW/GSP/PAIFQSSMT   | 0                 | 63          | 269         | 188         | 525         | 1625        | 238         | 444         | 0           | 0           | 806         | 125         |
|                   |    | C246 GSP/PAIFQSSMT/KILE/C247 GSP/PAIFQSSMT/KILE | 0                 | 38          | 81          | 288         | 625         | 1763        | 288         | 269         | 0           | 13          | 706         | 213         |
|                   |    | C248 IFQSSMT/KILE/PRA/C249 IFQSSMT/KILE/PRA     | 31                | 113         | 19          | 275         | 538         | 875         | 175         | 494         | 38          | 0           | 419         | 0           |
|                   |    | C250 SMT/KILE/PRA/KNP/C251 SMT/KILE/PRA/KNP     | 0                 | 25          | 106         | 63          | 500         | 450         | 25          | 156         | 0           | 0           | 106         | 900         |
|                   |    | C254 FRAKNP/VIYQ/MYD/C255 FRAKNP/VIYQ/MYD       | 81                | 38          | 44          | 75          | 163         | 363         | 50          | 344         | 313         | 0           | 356         | 800         |
| P8                | P8 | C256 NP/VIYQ/MYD/LV/C257 NP/VIYQ/MYD/LV         | 2081              | 875         | 6344        | 125         | 700         | 488         | 250         | 656         | 4238        | 88          | 381         | 0           |
|                   |    | C258 VIYQ/MYD/LV/GSD/C259 VIYQ/MYD/LV/GSD       | 3969              | 1513        | 5681        | 175         | 725         | 1238        | 400         | 381         | 5163        | 0           | 269         | 300         |
|                   |    | C260 YMD/LV/GSD/LEIG/C261 YMD/LV/GSD/LEIG       | 56                | 13          | 456         | 138         | 650         | 1088        | 200         | 0           | 313         | 88          | 306         | 1075        |
|                   |    | C262 LV/GSD/LEIG/QHRAK/C263 LV/GSD/LEIG/QHRAK   | 13                | 0           | 1369        | 0           | 0           | 0           | 194         | 0           | 0           | 0           | 0           | 246         |
|                   |    | C264 SDLEIG/QHRAK/IEEL/C265 SDLEIG/QHRAK/IEEL   | 138               | 0           | 1456        | 0           | 344         | 0           | 19          | 406         | 0           | 0           | 0           | 108         |
|                   |    | C266 IGQHRAK/IEEL/REHL/C267 IGQHRAK/IEEL/REHL   | 13                | 6           | 1119        | 0           | 0           | 0           | 219         | 0           | 0           | 0           | 138         | 433         |
|                   |    | C268 RAKIEEL/REHL/KWG/C269 RAKIEEL/REHL/KWG     | 125               | 0           | 1269        | 0           | 0           | 0           | 306         | 0           | 0           | 1688        | 0           | 0           |
|                   |    | C270 EELREHL/KWG/FTTP/C271 EELREHL/KWG/FTTP     | 50                | 0           | 1106        | 0           | 0           | 0           | 156         | 0           | 0           | 0           | 0           | 0           |
|                   |    | C272 EHL/KWG/FTTP/DKHH/C273 EHL/KWG/FTTP/DKHH   | 0                 | 0           | 1206        | 106         | 0           | 0           | 31          | 0           | 0           | 0           | 75          | 0           |
|                   |    | C274 KWG/FTTP/DKHH/QKEP/C275 KWG/FTTP/DKHH/QKEP | 0                 | 0           | 1294        | 0           | 0           | 0           | 94          | 0           | 0           | 0           | 113         | 171         |
| P9                | P9 | C278 KKHQKEPFLWMGVE/C279 KKHQKEPFLWMGVE         | 0                 | 506         | 1306        | 0           | 44          | 0           | 19          | 0           | 0           | 0           | 0           | 0           |
|                   |    | C280 KEPFLWMGVELHPD/C281 KEPFLWMGVELHPD         | 38                | 81          | 1386        | 0           | 169         | 0           | 206         | 0           | 0           | 100         | 0           | 0           |
|                   |    | C282 FLWMGVELHPDRWTV/C283 FHMWGLHPDKWVTV        | 225               | 31          | 501         | 0           | 219         | 850         | 69          | 344         | 0           | 175         | 0           | 83          |
|                   |    | C284 GYELHPDRWTV/QPIQ/C285 GYELHPDKWTV/QPIV     | 38                | 19          | 1719        | 0           | 3           |             |             |             |             |             |             |             |

**Figure S2D: Volunteers' HLA class I and peptide pair mapping by STCL (CFHRZ)**

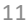



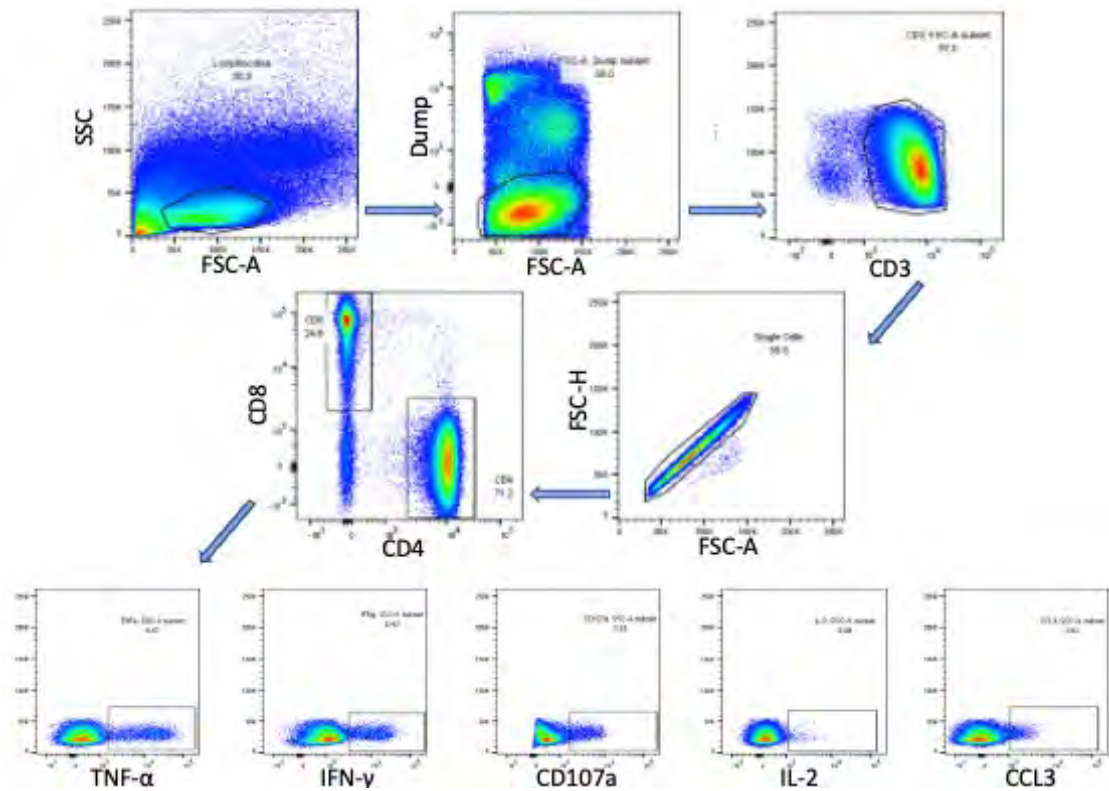

**Figure S3: Gating strategy for *ex vivo* functional analysis of vaccine-elicited T-cells**

Frozen PBMC of D35 were thawed and restimulated overnight with personalized peptide pools defined in figure S2.

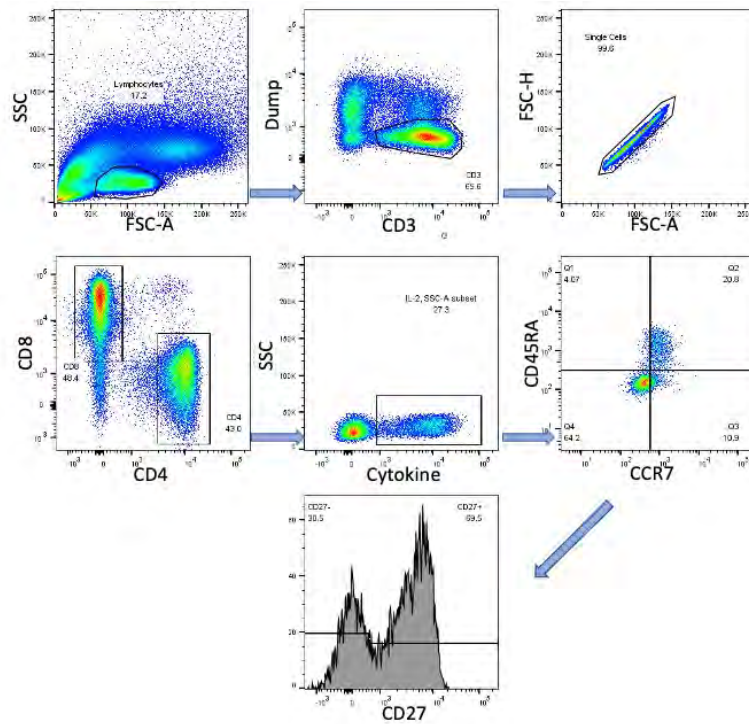

**Figure S4: Gating strategy for *ex vivo* memory structure of vaccine-elicited T-cells**

Frozen PBMC of D35 and personalized peptide pools defined in figure S2 were used for analysis.

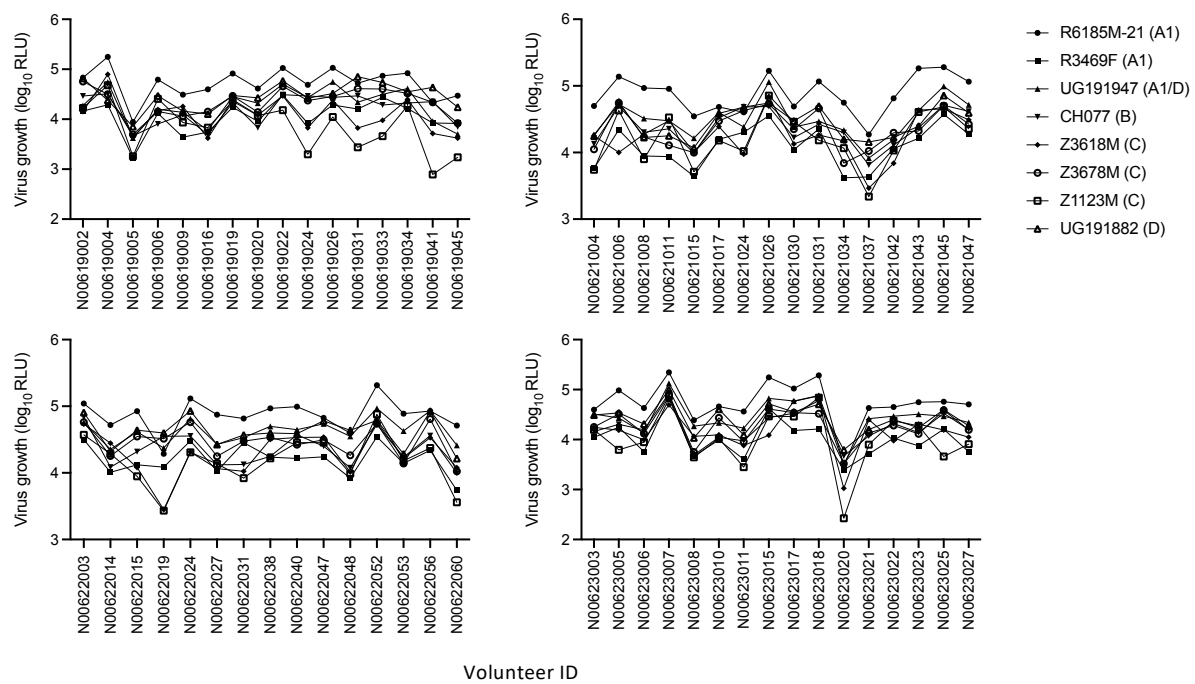

**Figure S5: Growth of IMCs of HIV-1 in volunteers' CD4<sup>+</sup> cells**

Thawed PBMC from D0 were expanded in the presence of bi-specific anti-CD3/CD8 mAbs for seven days to generate a CD4<sup>+</sup>-enriched cell population, infected at MOI 0.01 with a panel of eight HIV-1 IMCs expressing the luciferase enzyme and cultured for a further five days. Virus growth was quantified by *LucR* enzyme in the infected cell lysates following the addition of an appropriate substrate. Luminescence is expressed in relative light units (RLU).



## Region 1 – Gag1

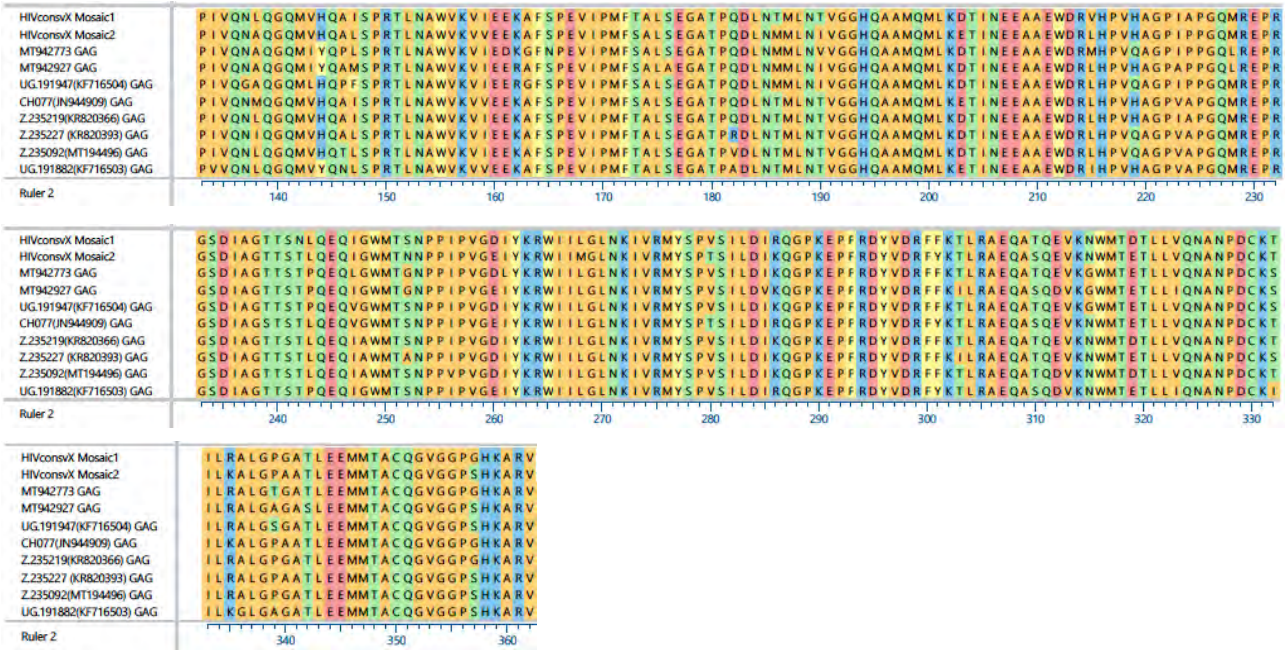

## Region 2 – Gag2

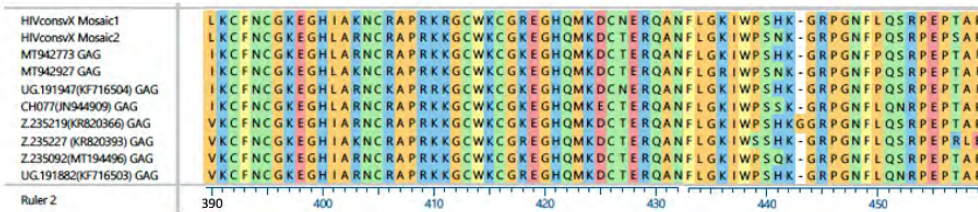

## Region 3 – Pol1

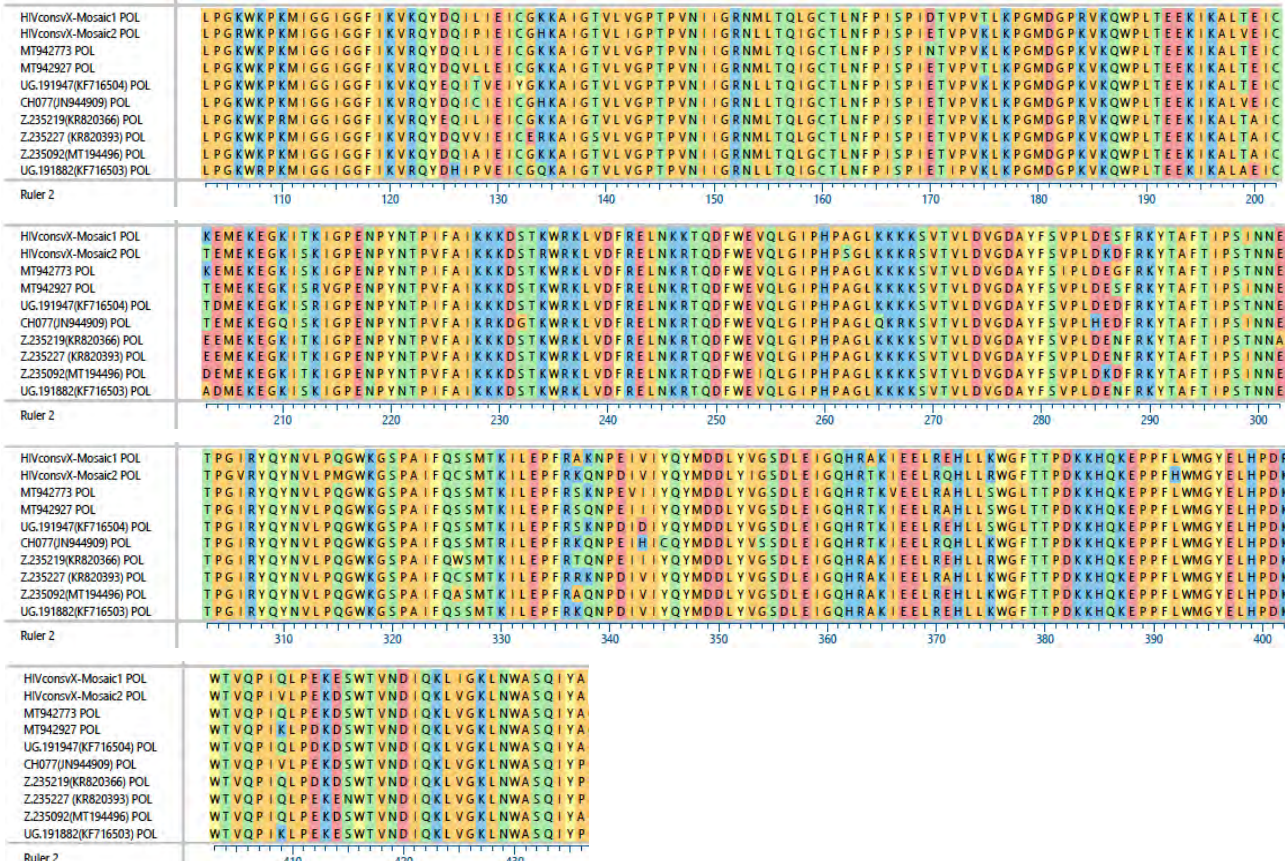

Figure S6: Alignment of HIVconsVX mosaics 1 and 2 with the VIA IMCs



## Region 4 – Pol2

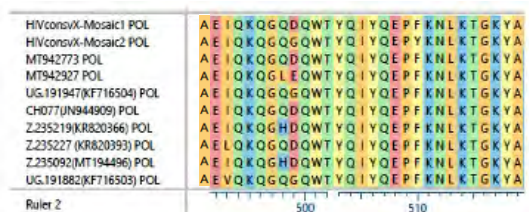

## Region 5 – Pol3

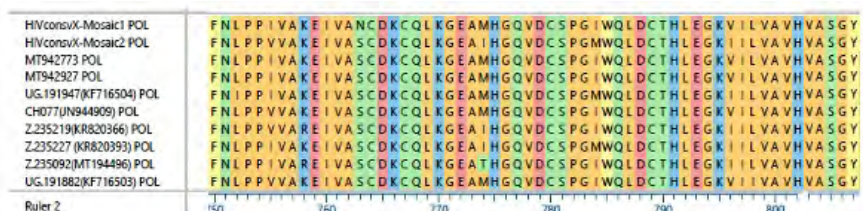

## Region 6 – Pol4

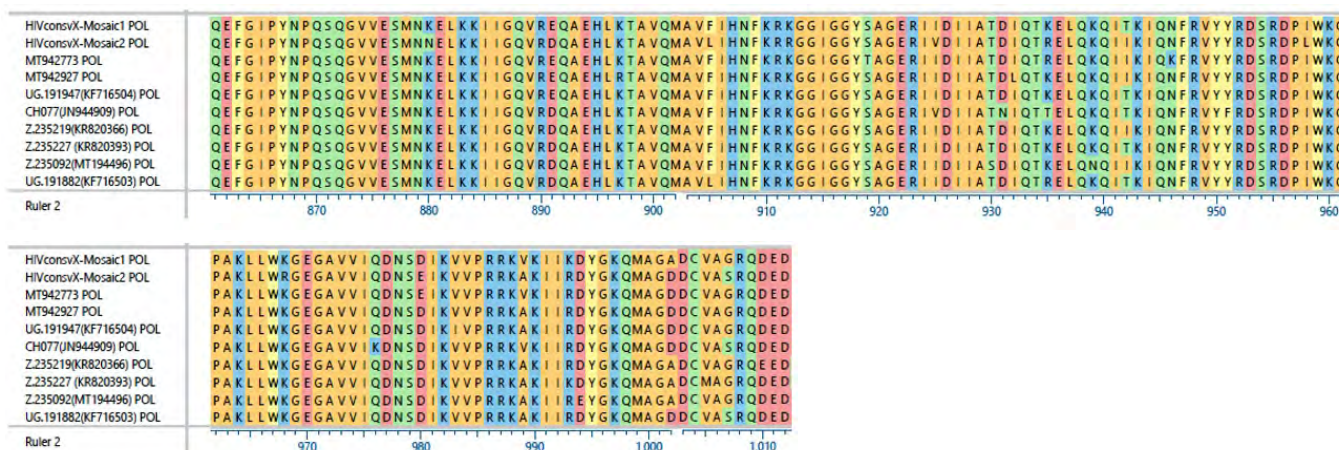

**Figure S6: Alignment of HIV consvX mosaics 1 and 2 with the VIA IMCs.**

Continued. The amino acid residues were colour-coded into physico-chemical sub-groups: orange - hydrophobic non-polar with alkyl group; yellow - hydrophobic non-polar with aromatic group; green - hydrophilic polar neutral; red - hydrophilic polar acidic; and blue - hydrophilic polar basic.



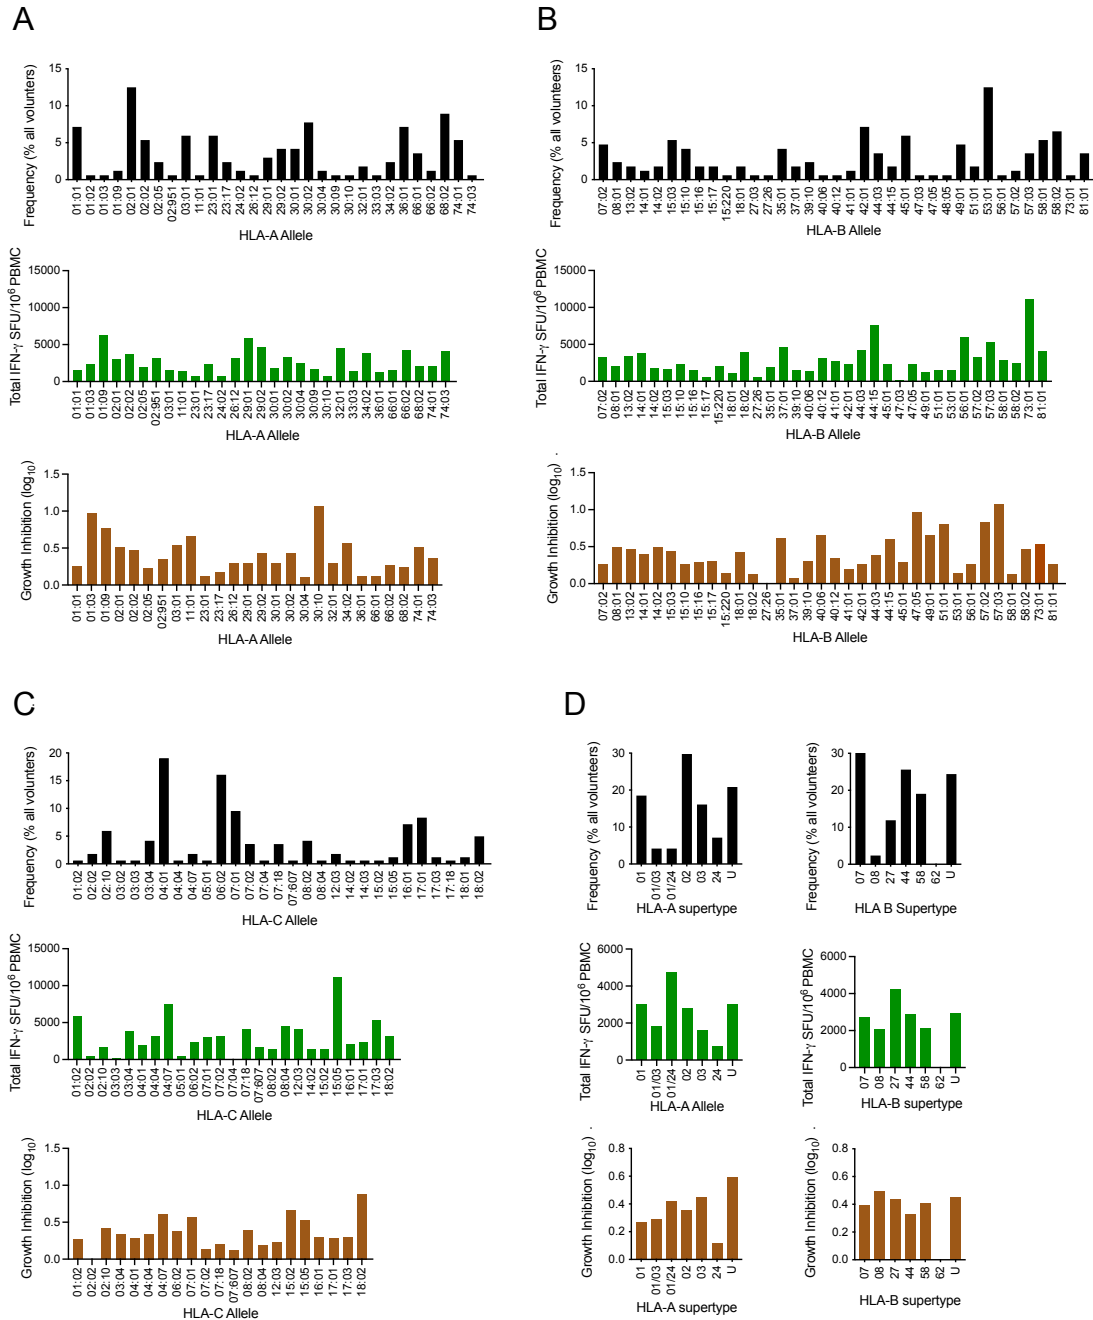

**Figure S7: HLA class I allele frequencies (black) and corresponding ELISPOT frequencies (green) and VIA (brown)**

HLA alleles were determined genetically using ssp PCR (IMGM Laboratories GmbH, Germany). HLA type (A-C) and supertype (D) frequencies for all study volunteers are shown, whereby U - unclassified supertype (black). Also shown are the frequencies of IFN- $\gamma$  ELISPOT frequencies (green) and growth inhibition (brown) associated with each HLA allele. No comparisons achieved statistical significance.

| <b>Reason</b>                                                                                                                                                                                                                                                                                                                                                                                                                                                                                                                                          |                 |                 |                 |                |                 |
|--------------------------------------------------------------------------------------------------------------------------------------------------------------------------------------------------------------------------------------------------------------------------------------------------------------------------------------------------------------------------------------------------------------------------------------------------------------------------------------------------------------------------------------------------------|-----------------|-----------------|-----------------|----------------|-----------------|
| <b>Inclusion criteria (values included are for those who selected NO)</b>                                                                                                                                                                                                                                                                                                                                                                                                                                                                              | <b>KAVI-ICR</b> | <b>MUL</b>      | <b>KWTRP</b>    | <b>CFHRZ</b>   | <b>Overall</b>  |
| Healthy male or female individual, as assessed by a medical history, physical exam, and laboratory tests?                                                                                                                                                                                                                                                                                                                                                                                                                                              | <b>24 (39%)</b> | <b>13 (28%)</b> | <b>23 (45%)</b> | <b>3 (10%)</b> | <b>63 (33%)</b> |
| At low risk of HIV infection and willing to maintain low-risk behaviour for the duration of the trial. Individuals from key populations are not excluded provided they are assessed to be at low risk of HIV infection at screening and are willing to maintain low-risk behaviour during the study.                                                                                                                                                                                                                                                   | <b>2 (3%)</b>   | <b>9 (19%)</b>  | <b>7 (14%)</b>  | <b>0 (0%)</b>  | <b>18 (9%)</b>  |
| At least 18 years of age on the day of screening and have not reached their 51st birthday on the day of the first vaccination?                                                                                                                                                                                                                                                                                                                                                                                                                         | 0 (0%)          | 0 (0%)          | 0 (0%)          | 0 (0%)         | 0 (0%)          |
| Willing and able to give informed consent for participation in the trial before any study-related procedures are performed. Volunteers will pass an <b>Assessment of Understanding before signing the consent form.</b>                                                                                                                                                                                                                                                                                                                                | 0 (0%)          | 0 (0%)          | 0 (0%)          | 0 (0%)         | 0 (0%)          |
| Willing to comply with the requirements of the protocol and be available for follow up for the planned duration of the study.                                                                                                                                                                                                                                                                                                                                                                                                                          | 0 (0%)          | 0 (0%)          | <b>1 (2%)</b>   | 0 (0%)         | <b>1 (1%)</b>   |
| Willing to undergo HIV testing, risk reduction counselling and receive HIV test results.                                                                                                                                                                                                                                                                                                                                                                                                                                                               | 0 (0%)          | 0 (0%)          | 0 (0%)          | 0 (0%)         | 0 (0%)          |
| All sexually active males (unless anatomically sterile or in a monogamous relationship with a female partner who uses a documented non-barrier method of birth control) must be willing to use an effective method of contraception (such as consistent condom use) from the day of first vaccination until 4 months after the last vaccination.                                                                                                                                                                                                       | 0 (0%)          | <b>1 (2%)</b>   | 0 (0%)          | 0 (0%)         | <b>1 (1%)</b>   |
| If a female of childbearing potential, willing to use an effective non-barrier method of contraception (hormonal contraceptive or intrauterine device) from at least 2 weeks prior to first vaccination until at least 4 months after the last study vaccination. If not of childbearing potential: postmenopausal (>45 years of age with amenorrhea for at least 2 years, or any age with amenorrhea for at least 6 months and a serum follicle stimulating hormone [FSH] level>40 IU/L) or surgically sterile: no additional contraception required. | <b>1 (2%)</b>   | 0 (0%)          | <b>1 (2%)</b>   | 0 (0%)         | <b>2 (1%)</b>   |
| All female volunteers must be willing to undergo urine pregnancy tests at time points indicated in the Schedule of Procedures and must test negative prior to each study vaccination.                                                                                                                                                                                                                                                                                                                                                                  | <b>1 (2%)</b>   | 0 (0%)          | 0 (0%)          | 0 (0%)         | <b>1 (1%)</b>   |
| Willing to forego donations of blood or any other tissues during the trial and, for those who test positive for HIV antibodies due to vaccination (vaccine-induced seropositivity/ reactivity), until the anti-HIV antibody titres become undetectable.                                                                                                                                                                                                                                                                                                | 0 (0%)          | 0 (0%)          | 0 (0%)          | 0 (0%)         | 0 (0%)          |
| <b>Exclusion criteria (values included are for those who selected YES)</b>                                                                                                                                                                                                                                                                                                                                                                                                                                                                             | <b>KAVI-ICR</b> | <b>MUL</b>      | <b>KWTRP</b>    | <b>CFHRZ</b>   | <b>Overall</b>  |
| Confirmed HIV-1 or HIV-2 infection                                                                                                                                                                                                                                                                                                                                                                                                                                                                                                                     | <b>1 (2%)</b>   | <b>4 (9%)</b>   | 0 (0%)          | 0 (0%)         | <b>5 (3%)</b>   |
| Receipt of any vaccine in the previous 28 days or planned receipt within 28 days of Investigational Medicinal Product. Volunteers who expect to receive any adenoviral vectored vaccines within the next three months after ChAdOx1.tHIVconsV1 vaccine administration should not participate due to the risk of immune interference with the study vaccine.                                                                                                                                                                                            | <b>2 (3%)</b>   | 0 (0%)          | 0 (0%)          | 0 (0%)         | <b>2 (1%)</b>   |
| Participation in another clinical trial of an Investigational Medicinal Product currently, within the previous 3 months or expected participation during the study.                                                                                                                                                                                                                                                                                                                                                                                    | 0 (0%)          | 0 (0%)          | 0 (0%)          | 0 (0%)         | 0 (0%)          |
| Previous receipt of another investigational HIV vaccine candidate or any adenoviral vectored vaccine (Note: receipt of an HIV vaccine placebo will not exclude a volunteer from participation if documentation is available and the Medical Monitor gives approval).                                                                                                                                                                                                                                                                                   | 0 (0%)          | 0 (0%)          | 0 (0%)          | 0 (0%)         | 0 (0%)          |
| Receipt of blood transfusion or blood-derived products within the previous 4 months or expectation of receiving blood products during the study period.                                                                                                                                                                                                                                                                                                                                                                                                | 0 (0%)          | 0 (0%)          | 0 (0%)          | 0 (0%)         | 0 (0%)          |
| Receipt of immunoglobulin products within the previous 3 months.                                                                                                                                                                                                                                                                                                                                                                                                                                                                                       | 0 (0%)          | 0 (0%)          | 0 (0%)          | 0 (0%)         | 0 (0%)          |
| If female, pregnant or planning a pregnancy during the period of enrolment until 4 months after the last study vaccination; or lactating.                                                                                                                                                                                                                                                                                                                                                                                                              | <b>1 (2%)</b>   | 0 (0%)          | <b>1 (2%)</b>   | 0 (0%)         | <b>2 (1%)</b>   |
| Any confirmed or suspected history of immunodeficiency including recurrent severe infections.                                                                                                                                                                                                                                                                                                                                                                                                                                                          | 0 (0%)          | 0 (0%)          | 0 (0%)          | 0 (0%)         | 0 (0%)          |
| Use of systemic corticosteroids for >14 days (use of topical or inhaled steroids is permitted) within the previous 6 months.                                                                                                                                                                                                                                                                                                                                                                                                                           | 0 (0%)          | 0 (0%)          | 0 (0%)          | 0 (0%)         | 0 (0%)          |
| Immunosuppressive, anti-cancer, anti-tuberculosis or other medications considered significant by the investigator within the previous 6 months.                                                                                                                                                                                                                                                                                                                                                                                                        | 0 (0%)          | 0 (0%)          | 0 (0%)          | 0 (0%)         | 0 (0%)          |
| History of splenectomy.                                                                                                                                                                                                                                                                                                                                                                                                                                                                                                                                | 0 (0%)          | 0 (0%)          | 0 (0%)          | 0 (0%)         | 0 (0%)          |
| History of autoimmune disease                                                                                                                                                                                                                                                                                                                                                                                                                                                                                                                          | 0 (0%)          | 0 (0%)          | 0 (0%)          | 0 (0%)         | 0 (0%)          |
| Immunosuppressive, anti-cancer, anti-tuberculosis or other medications considered significant by the investigator within the previous 6 months.                                                                                                                                                                                                                                                                                                                                                                                                        | 0 (0%)          | 0 (0%)          | 0 (0%)          | 0 (0%)         | 0 (0%)          |
| History of splenectomy.                                                                                                                                                                                                                                                                                                                                                                                                                                                                                                                                | 0 (0%)          | 0 (0%)          | 0 (0%)          | 0 (0%)         | 0 (0%)          |
| History of autoimmune disease                                                                                                                                                                                                                                                                                                                                                                                                                                                                                                                          | 0 (0%)          | 0 (0%)          | 0 (0%)          | 0 (0%)         | 0 (0%)          |
| Bleeding disorder diagnosed by a physician (e.g., factor deficiency, coagulopathy or platelet disorder that requires special precautions). (Note: a volunteer that states that he or she has easy bruising or bleeding but does not have a formal diagnosis and has intramuscular injections and blood draws without any adverse experience is eligible).                                                                                                                                                                                              | 0 (0%)          | 0 (0%)          | 0 (0%)          | 0 (0%)         | 0 (0%)          |

**Table S1: Reasons for screen failure (by CRCs)**

| Reason                                                                                                                                                                                                                                                                                                                      | KAVI-ICR | MUL    | KWTRP    | CFHRZ  | Overall  |
|-----------------------------------------------------------------------------------------------------------------------------------------------------------------------------------------------------------------------------------------------------------------------------------------------------------------------------|----------|--------|----------|--------|----------|
| History of myocarditis, pericarditis, cardiomyopathy, congestive heart failure with permanent sequelae, or clinically significant arrhythmia (including any arrhythmia requiring medication, treatment, or clinical follow up).                                                                                             | 0 (0%)   | 0 (0%) | 0 (0%)   | 0 (0%) | 0 (0%)   |
| History of cancer, except basal cell carcinoma of the skin.                                                                                                                                                                                                                                                                 | 0 (0%)   | 0 (0%) | 0 (0%)   | 0 (0%) | 0 (0%)   |
| Asthma that is not well controlled.                                                                                                                                                                                                                                                                                         | 0 (0%)   | 0 (0%) | 0 (0%)   | 0 (0%) | 0 (0%)   |
| History of allergic disease or reactions likely to be exacerbated by any component of the vaccine.                                                                                                                                                                                                                          | 1 (2%)   | 0 (0%) | 0 (0%)   | 0 (0%) | 1 (1%)   |
| History of severe local or systemic reactogenicity to vaccines (e.g., anaphylaxis, respiratory difficulty, angioedema).                                                                                                                                                                                                     | 0 (0%)   | 1 (2%) | 0 (0%)   | 0 (0%) | 1 (1%)   |
| History of Guillain-Barre syndrome.                                                                                                                                                                                                                                                                                         | 0 (0%)   | 0 (0%) | 0 (0%)   | 0 (0%) | 0 (0%)   |
| Confirmed diagnosis of active or chronic hepatitis B, hepatitis C, active syphilis and/or active tuberculosis.                                                                                                                                                                                                              | 1 (2%)   | 3 (6%) | 2 (4%)   | 1 (3%) | 7 (4%)   |
| Seizure disorder: an individual who has had a seizure in the last 3 years is excluded (Not excluded: an individual with a history of seizures who has neither required medication nor had a seizure for three or more years).                                                                                               | 0 (0%)   | 0 (0%) | 0 (0%)   | 0 (0%) | 0 (0%)   |
| History of serious psychiatric conditions or any psychiatric condition that precludes compliance with the protocol. Specifically excluded are persons with psychoses, ongoing risk for suicide, or history of suicide attempt or gesture within the past 3 years.                                                           | 0 (0%)   | 0 (0%) | 0 (0%)   | 0 (0%) | 0 (0%)   |
| Substance abuse disorder that precludes compliance with the protocol as assessed by the investigator.                                                                                                                                                                                                                       | 1 (2%)   | 0 (0%) | 2 (4%)   | 0 (0%) | 3 (2%)   |
| Any clinically significant acute or chronic medical condition that is considered unstable/progressive, or in the opinion of the Investigator, may either put the volunteer at risk because of participation in the study, or may influence the result of the study, or the volunteer's ability to participate in the study. | 1 (2%)   | 0 (0%) | 12 (24%) | 0 (0%) | 13 (7%)  |
| Haematology 9.1 Haemoglobin - <9.5 g/dl in females; <11.0 g/dl in males                                                                                                                                                                                                                                                     | 1 (2%)   | 0 (0%) | 0 (0%)   | 0 (0%) | 1 (1%)   |
| Absolute Neutrophil Count (ANC) - ≤1,000/mm <sup>3</sup>                                                                                                                                                                                                                                                                    | 0 (0%)   | 0 (0%) | 1 (2%)   | 1 (3%) | 2 (1%)   |
| Absolute Lymphocyte Count (ALC) - ≤650/mm <sup>3</sup>                                                                                                                                                                                                                                                                      | 0 (0%)   | 0 (0%) | 0 (0%)   | 0 (0%) | 0 (0%)   |
| Platelets - < 100,000 cells/mm <sup>3</sup> .                                                                                                                                                                                                                                                                               | 0 (0%)   | 0 (0%) | 0 (0%)   | 0 (0%) | 0 (0%)   |
| Chemistry 9.4 Creatinine >1.1 x upper limit of normal (ULN).                                                                                                                                                                                                                                                                | 1 (2%)   | 0 (0%) | 10 (20%) | 0 (0%) | 11 (6%)  |
| AST >1.25 x ULN                                                                                                                                                                                                                                                                                                             | 1 (2%)   | 0 (0%) | 0 (0%)   | 0 (0%) | 1 (1%)   |
| ALT >1.25 x ULN                                                                                                                                                                                                                                                                                                             | 0 (0%)   | 0 (0%) | 0 (0%)   | 1 (3%) | 1 (1%)   |
| Clinically significant abnormal dipstick confirmed by microscopy:9.7 Protein = 2+ or more.                                                                                                                                                                                                                                  | 3 (5%)   | 1 (2%) | 1 (2%)   | 0 (0%) | 5 (3%)   |
| Blood = 2+ or more (not due to menses)                                                                                                                                                                                                                                                                                      | 2 (3%)   | 0 (0%) | 4 (8%)   | 0 (0%) | 6 (3%)   |
| Any other finding which in the opinion of the investigators would significantly increase the risk of having an adverse outcome from participating in the study.                                                                                                                                                             | 4 (6%)   | 0 (0%) | 27 (53%) | 1 (3%) | 32 (17%) |
| If, in the opinion of the Principal Investigator, it is not in the best interest of the volunteer to participate in the trial.                                                                                                                                                                                              | 0 (0%)   | 1 (2%) | 27 (53%) | 0 (0%) | 28 (15%) |

**Table S1: Reasons for screen failure (by CRCs).**  
Continued.

| Site         | Volunteers<br>screened | Females<br>screened | Males<br>screened | Volunteers<br>screened out | Volunteers<br>enrolled | Females<br>enrolled | Males<br>enrolled |
|--------------|------------------------|---------------------|-------------------|----------------------------|------------------------|---------------------|-------------------|
| MUL          | 47 (100%)              | 18 (38%)            | 29 (62%)          | 25 (53%)                   | 22 (47%)               | 5 (11%)             | 17 (36%)          |
| KWTRP        | 50 (100%)              | 9 (18%)             | 41 (82%)          | 27 (54%)                   | 23 (46%)               | 2 (4%)              | 21 (42%)          |
| KAVI-ICR     | 62 (100%)              | 32 (52%)            | 30 (48%)          | 34 (55%)                   | 22 (35%)               | 14 (23%)            | 8 (13%)           |
| CFHRZ        | 27 (100%)              | 12 (44%)            | 15 (56%)          | 5 (19%)                    | 22 (81%)               | 11 (41%)            | 11 (41%)          |
| <b>Total</b> | <b>186 (100%)</b>      | <b>71 (38%)</b>     | <b>115 (62%)</b>  | <b>91 (49%)</b>            | <b>89 (48%)</b>        | <b>32 (17%)</b>     | <b>57 (31%)</b>   |

**Table S2: Recruitment summary by CRCs and overall**

| Volunteer ID | AE description                                              | Severity | Onset days after vaccination | Days between onset and resolution | Relation to IP          | Outcome                       |
|--------------|-------------------------------------------------------------|----------|------------------------------|-----------------------------------|-------------------------|-------------------------------|
| N00619004    | ABNORMAL VAGINAL DISCHARGE SYNDROME                         | Grade 2  | 26                           | 12                                | No relationship         | Resolved, no residual effects |
| N00619006    | UPPER RESPIRATORY TRACT INFECTION                           | Grade 2  | 16                           | 7                                 | No relationship         | Resolved, no residual effects |
| N00619006    | MALARIA                                                     | Grade 2  | 14                           | 9                                 | No relationship         | Resolved, no residual effects |
| N00619024    | HEADACHE                                                    | Grade 2  | 24                           | 10                                | No relationship         | Resolved, no residual effects |
| N00619024    | CHILLS                                                      | Grade 2  | 24                           | 10                                | No relationship         | Resolved, no residual effects |
| N00619041    | SOFT TISSUE INJURY                                          | Grade 2  | 26                           | 11                                | No relationship         | Resolved, no residual effects |
| N00619041    | RIGHT ANKLE SPRAIN                                          | Grade 2  | 26                           | 8                                 | No relationship         | Resolved, no residual effects |
| N00619042    | UNSPECIFIC FEBRILE ILLNESS                                  | Grade 2  | 13                           | 3                                 | Unlikely                | Resolved, no residual effects |
| N00619047    | TONSILLITIS                                                 | Grade 2  | 20                           | 2                                 | No relationship         | Resolved, no residual effects |
| N00621006    | ARTHRITIS                                                   | Grade 1  | 8                            | 11                                | No relationship         | Resolved, no residual effects |
| N00621006    | BILATERAL LOWER LIMB MUSCLE PAINS                           | Grade 1  | 15                           | 18                                | No relationship         | Resolved, no residual effects |
| N00622006    | COUGH                                                       | Grade 1  | 5                            | 7                                 | No relationship         | Resolved, no residual effects |
| N00622019    | UPPER RESPIRATORY TRACT INFECTION                           | Grade 2  | 2                            | 5                                 | No relationship         | Resolved, no residual effects |
| N00622027    | VAGINAL CANDIDIASIS                                         | Grade 1  | 26                           | 5                                 | No relationship         | Resolved, no residual effects |
| N00622040    | TOOTH ACHE                                                  | Grade 2  | 19                           | 3                                 | No relationship         | Resolved, no residual effects |
| N00622044    | FATIGUE                                                     | Grade 1  | 11                           | 3                                 | Possible (Yes expected) | Resolved, no residual effects |
| N00622044    | HEADACHE                                                    | Grade 1  | 11                           | 0                                 | Possible (Yes expected) | Resolved, no residual effects |
| N00622048    | CELLULITIS                                                  | Grade 2  | 10                           | 11                                | No relationship         | Resolved, no residual effects |
| N00623003    | HEADACHE                                                    | Grade 2  | 18                           | 1                                 | No relationship         | Resolved, no residual effects |
| N00623003    | UPPER RESPIRATORY TRACT INFECTION                           | Grade 2  | 23                           | 6                                 | No relationship         | Resolved, no residual effects |
| N00623005    | ARTHRALGIA OF THE KNEES                                     | Grade 2  | 12                           | 2                                 | No relationship         | Resolved, no residual effects |
| N00623008    | ACUTE ENTERITIS                                             | Grade 2  | 2                            | 3                                 | Possible (Not expected) | Resolved, no residual effects |
| N00623016    | FLU LIKE ILLNESS                                            | Grade 3  | 26                           | 8                                 | Unlikely                | Resolved, no residual effects |
| N00623017    | BILATERAL EYE PAIN                                          | Grade 1  | 1                            | 1                                 | Unlikely                | Resolved, no residual effects |
| N00623021    | PAIN AND DISCOLORATION AT VENEPUNCTURE SITE - RIGHT FOREARM | Grade 2  | 7                            | 3                                 | No relationship         | Resolved, no residual effects |
| N00623021    | UPPER RESPIRATORY TRACT INFECTION                           | Grade 1  | 20                           | 6                                 | No relationship         | Resolved, no residual         |
| N00623022    | UPPER RESPIRATORY TRACT INFECTION                           | Grade 1  | 11                           | 3                                 | Unlikely                | Resolved, no residual effects |
| N00623023    | FLU LIKE ILLNESS                                            | Grade 2  | 25                           | 1                                 | No relationship         | Resolved, no residual effects |
| N00623024    | HEADACHE                                                    | Grade 1  | 28                           | 11                                | No relationship         | Resolved, no residual effects |

Highlighted in yellow are placebo recipients.

**Table S3: Unsolicited AEs reported after administration of the vaccines or placebo**

| Volunteer ID | Days from vaccination | Category     | Test             | Result               | Units   | Severity |
|--------------|-----------------------|--------------|------------------|----------------------|---------|----------|
| N00619019    | 19                    | Haematology  | Platelet         | 117x10 <sup>9</sup>  | cells/L | Grade 1  |
| N00619019    | 28                    | Haematology  | Platelet         | 121x10 <sup>9</sup>  | cells/L | Grade 1  |
| N00619019    | 47                    | Haematology  | Platelet         | 97x10 <sup>9</sup>   | cells/L | Grade 2  |
| N00619019    | 50                    | Haematology  | Platelet         | 111x10 <sup>9</sup>  | cells/L | Grade 1  |
| N00619019    | 132                   | Haematology  | Platelet         | 104x10 <sup>9</sup>  | cells/L | Grade 1  |
| N00619024    | 37                    | Haematology  | Platelet         | 123x10 <sup>9</sup>  | cells/L | Grade 1  |
| N00622040    | 27                    | Biochemistry | Bilirubin        | 59·1                 | mg/dL   | Grade 1  |
| N00623005    | 1                     | Haematology  | Lymphocytes      | 0·35x10 <sup>9</sup> | cells/L | Grade 3  |
| N00623011    | 7                     | Haematology  | White Blood Cell | 2·36x10 <sup>9</sup> | cells/L | Grade 1  |
| N00623011    | 28                    | Haematology  | White Blood Cell | 2·41x10 <sup>9</sup> | cells/L | Grade 1  |
| N00623011    | 184                   | Haematology  | White Blood Cell | 2·27x10 <sup>9</sup> | cells/L | Grade 1  |

**Table S4: Laboratory abnormalities**

| No. | IMC-LucR.6ATRI | Clade | Country of isolation | Year of virus isolation | Type | GenBank  |
|-----|----------------|-------|----------------------|-------------------------|------|----------|
| 1   | R.175019       | A     | Rwanda               | 2005                    | T/F  | MT942773 |
| 2   | R.175090       | A     | Rwanda               | 2010                    | T/F  | MT942927 |
| 3   | UG.191947      | A/D   | Uganda               | 2007                    | FSI  | KF716504 |
| 4   | CH077          | B     | USA                  | 2006                    | T/F  | JN944909 |
| 5   | Z.235219       | C     | Zambia               | 2007                    | T/F  | KR820366 |
| 6   | Z.235227       | C     | Zambia               | 2009                    | T/F  | KR820393 |
| 7   | Z.235092       | C     | Zambia               | 2008                    | T/F  | MT194496 |
| 8   | UG.191882      | D     | Uganda               | 2009                    | FSI  | KF716503 |

**Table S5: HIV-1 infectious molecular clones (IMCs) employed in VIA**

T/F – transmitted/founder virus; FSI – Fiebig stage I

| Volunteer<br>Magn/Pools | Visit<br>day | Log <sub>10</sub> RLU reduction for CD4 <sup>+</sup> /CD8 <sup>+</sup> T-cell co-cultures compared with CD4 <sup>+</sup> T cells alone |          |           |       |          |          |          |           | IMC inhibited<br>per subject  |      |
|-------------------------|--------------|----------------------------------------------------------------------------------------------------------------------------------------|----------|-----------|-------|----------|----------|----------|-----------|-------------------------------|------|
|                         |              | A                                                                                                                                      | A        | A/D       | B     | C        | C        | C        | D         | ≥0.1 log <sub>10</sub><br>D35 | D308 |
|                         |              | R.175019                                                                                                                               | R.175090 | UG.191947 | CH077 | Z.235219 | Z.235227 | Z.235092 | UG.191882 |                               |      |
| N00619002<br>7100/10    | D0           | 0.92                                                                                                                                   | 0.59     | 0.93      | 0.94  | 0.56     | 0.79     | 0.71     | 0.85      |                               |      |
|                         | D35          | 1.39                                                                                                                                   | 1.71     | 1.34      | 2.47  | 2.22     | 2.30     | 1.57     | 2.13      | 8                             |      |
|                         | D308         | 1.23                                                                                                                                   | 1.55     | 1.32      | 2.14  | 1.72     | 1.84     | 1.42     | 1.77      |                               | 8    |
| N00619004<br>3100/9     | D0           | 0.15                                                                                                                                   | -0.05    | 0.07      | 0.02  | -0.01    | -0.02    | -0.10    | -0.06     |                               |      |
|                         | D35          | 0.50                                                                                                                                   | 0.86     | 1.22      | 0.59  | 0.38     | 0.54     | 0.30     | 0.91      | 8                             |      |
|                         | D308         | 0.38                                                                                                                                   | 0.30     | 0.41      | 0.29  | 0.06     | 0.21     | 0.05     | 0.40      |                               | 8    |
| N00619005<br>3960/9     | D0           | -0.10                                                                                                                                  | -0.10    | 0.09      | 0.24  | -0.10    | 0.17     | -0.22    | 0.35      |                               |      |
|                         | D35          | 0.58                                                                                                                                   | 1.01     | 0.60      | 0.98  | 0.00     | 1.30     | 0.53     | 1.23      | 8                             |      |
|                         | D308         | 0.47                                                                                                                                   | 0.72     | 0.46      | 0.67  | -0.05    | 0.81     | -0.02    | 0.99      |                               | 7    |
| N00619006 P<br>70/0     | D0           | 0.47                                                                                                                                   | 0.56     | 0.51      | 0.53  | 0.26     | 0.61     | 0.43     | 0.85      |                               |      |
|                         | D35          | 0.42                                                                                                                                   | 0.40     | 0.40      | 0.36  | 0.17     | 0.49     | 0.33     | 0.77      | 0                             |      |
|                         | D308         | 0.44                                                                                                                                   | 0.51     | 0.48      | 0.32  | 0.23     | 0.52     | 0.38     | 0.84      |                               | 0    |
| N00619009<br>3480/9     | D0           | 0.14                                                                                                                                   | 0.16     | 0.20      | 0.27  | 0.12     | 0.34     | 0.07     | 0.34      |                               |      |
|                         | D35          | 0.30                                                                                                                                   | 0.40     | 0.88      | 0.45  | 0.14     | 0.74     | 0.09     | 1.21      | 6                             |      |
|                         | D308         | 0.32                                                                                                                                   | 0.34     | 0.62      | 0.34  | 0.18     | 0.48     | 0.19     | 0.75      |                               | 6    |
| N00619016<br>10090/9    | D0           | 0.64                                                                                                                                   | 0.52     | 0.34      | 0.39  | 0.26     | 0.60     | 0.30     | 0.46      |                               |      |
|                         | D35          | 1.05                                                                                                                                   | 1.12     | 0.83      | 0.91  | 0.59     | 1.06     | 0.94     | 1.03      | 8                             |      |
|                         | D308         | 0.94                                                                                                                                   | 0.87     | 0.83      | 0.77  | 0.52     | 0.97     | 0.83     | 0.96      |                               | 8    |
| N00619019<br>7550/10    | D0           | 0.80                                                                                                                                   | 0.85     | 0.76      | 0.90  | 0.48     | 0.84     | 0.80     | 0.78      |                               |      |
|                         | D35          | 1.58                                                                                                                                   | 1.02     | 1.61      | 1.09  | 1.09     | 1.33     | 0.93     | 1.20      | 8                             |      |
|                         | D308         | 0.99                                                                                                                                   | 0.94     | 1.14      | 0.94  | 0.58     | 1.02     | 0.88     | 0.97      |                               | 5    |
| N00619020<br>4730/9     | D0           | 0.34                                                                                                                                   | 0.32     | 0.47      | 0.36  | 0.35     | 0.38     | 0.36     | 0.48      |                               |      |
|                         | D35          | 0.71                                                                                                                                   | 0.95     | 1.11      | 0.70  | 0.54     | 0.78     | 0.62     | 1.02      | 8                             |      |
|                         | D308         | 0.63                                                                                                                                   | 0.60     | 0.70      | 0.55  | 0.37     | 0.48     | 0.39     | 0.79      |                               | 6    |
| N00619022<br>5930/10    | D0           | 0.30                                                                                                                                   | 0.54     | 0.39      | 0.43  | 0.33     | 0.39     | 0.44     | 0.55      |                               |      |
|                         | D35          | 0.55                                                                                                                                   | 0.70     | 0.70      | 0.56  | 0.71     | 0.69     | 0.66     | 0.82      | 8                             |      |
|                         | D308         | 0.28                                                                                                                                   | 0.55     | 0.38      | 0.48  | 0.40     | 0.43     | 0.36     | 0.58      |                               | 0    |
| N00619024<br>6200/10    | D0           | 0.24                                                                                                                                   | 0.06     | 0.24      | 0.36  | 0.09     | 0.20     | 0.15     | 0.29      |                               |      |
|                         | D35          | 0.56                                                                                                                                   | 0.52     | 0.78      | 0.67  | 0.23     | 0.51     | 0.33     | 0.73      | 8                             |      |
|                         | D308         | 0.19                                                                                                                                   | 0.12     | 0.17      | 0.37  | -0.02    | 0.11     | -0.04    | 0.29      |                               | 0    |
| N00619026<br>4230//10   | D0           | 0.48                                                                                                                                   | 0.52     | 0.58      | 0.70  | 0.39     | 0.59     | 0.59     | 0.62      |                               |      |
|                         | D35          | 0.94                                                                                                                                   | 0.76     | 1.11      | 0.99  | 0.64     | 0.71     | 0.95     | 0.86      | 8                             |      |
|                         | D308         | 0.83                                                                                                                                   | 0.77     | 1.01      | 0.71  | 0.36     | 0.57     | 0.62     | 0.56      |                               | 3    |
| N00619031<br>6240/10    | D0           | 0.70                                                                                                                                   | 0.54     | 0.52      | 0.61  | 0.46     | 0.71     | 0.68     | 0.83      |                               |      |
|                         | D35          | 0.88                                                                                                                                   | 0.91     | 1.11      | 0.88  | 1.09     | 1.15     | 0.81     | 1.41      | 8                             |      |
|                         | D308         | 0.76                                                                                                                                   | 0.68     | 0.80      | 0.71  | 0.58     | 0.90     | 0.76     | 1.03      |                               | 6    |
| N00619033<br>6090/9     | D0           | 0.49                                                                                                                                   | 0.56     | 0.53      | 0.55  | 0.38     | 0.62     | 0.48     | 0.62      |                               |      |
|                         | D35          | 2.36                                                                                                                                   | 0.82     | 1.90      | 0.76  | 0.37     | 1.28     | 0.80     | 1.45      | 7                             |      |
|                         | D308         | 1.84                                                                                                                                   | 0.48     | 1.46      | 0.44  | 0.21     | 0.82     | 0.43     | 1.01      |                               | 4    |
| N00619034<br>4480/6     | D0           | 0.28                                                                                                                                   | 0.33     | 0.27      | 0.29  | 0.10     | 0.33     | 0.23     | 0.39      |                               |      |
|                         | D35          | 0.44                                                                                                                                   | 1.13     | 0.85      | 1.52  | 1.59     | 1.48     | 0.63     | 1.46      | 8                             |      |
|                         | D308         | 0.29                                                                                                                                   | 0.51     | 0.48      | 0.58  | 0.61     | 0.67     | 0.35     | 0.82      |                               | 7    |
| N00619041<br>4090/10    | D0           | 0.43                                                                                                                                   | 0.43     | 0.36      | 0.56  | 0.41     | 0.63     | ivg      | 0.54      |                               |      |
|                         | D35          | 1.15                                                                                                                                   | 0.42     | 1.00      | 1.06  | 0.67     | 0.56     | ivg      | 0.90      | 5                             |      |
|                         | D308         | 0.91                                                                                                                                   | 0.49     | 0.77      | 0.77  | 0.42     | 0.55     | ivg      | 0.69      |                               | 4    |

The 1st column shows volunteer ID (placebos highlighted yellow) and ELISPOT data (Magn/Pools - total magnitude as SFU/10<sup>6</sup> PBMC/Number of recognized pools). P – placebo. Dark red – inhibition relative to day 0 increased by more than ≥1.0 log<sub>10</sub>; medium red - inhibition relative to day 0 increased by <1.0 log<sub>10</sub> to ≥0.1 log<sub>10</sub>; light red - inhibition relative to day 0 increased by <0.1 log<sub>10</sub>; no colour – no increase in inhibition relative to pre-vaccination; nd – no data; ivg – insufficient virus growth.

**Table S6A: Cross-clade HIV inhibition *in vitro* (MUL)**

| Volunteer<br>Magn/Pools | Visit<br>day | Log <sub>10</sub> RLU reduction for CD4 <sup>+</sup> /CD8 <sup>+</sup> T-cell co-cultures compared with CD4 <sup>+</sup> T cells alone |          |           |       |          |          |          |           | IMC inhibited<br>per subject |      |
|-------------------------|--------------|----------------------------------------------------------------------------------------------------------------------------------------|----------|-----------|-------|----------|----------|----------|-----------|------------------------------|------|
|                         |              | A                                                                                                                                      | A        | A/D       | B     | C        | C        | C        | D         | ≥0.1 log <sub>10</sub>       |      |
|                         |              | R.175019                                                                                                                               | R.175090 | UG.191947 | CH077 | Z.235219 | Z.235227 | Z.235092 | UG.191882 | D35                          | D308 |
| N00621004<br>11130/10   | D0           | 0.60                                                                                                                                   | 0.45     | 0.45      | 0.63  | -0.01    | 0.43     | 0.01     | 0.46      | 7                            | 8    |
|                         | D35          | 0.67                                                                                                                                   | 1.30     | 0.76      | 1.50  | 0.65     | 0.86     | 0.61     | 0.93      |                              |      |
|                         | D308         | 0.76                                                                                                                                   | 1.19     | 0.74      | 1.19  | 0.54     | 0.87     | 0.62     | 0.88      |                              |      |
| N00621006<br>1370/7     | D0           | 0.16                                                                                                                                   | 0.19     | 0.23      | 0.31  | 0.11     | 0.25     | 0.47     | 0.37      | 8                            | 5    |
|                         | D35          | 0.83                                                                                                                                   | 0.91     | 1.18      | 0.52  | 0.30     | 0.68     | 1.11     | 1.46      |                              |      |
|                         | D308         | 0.26                                                                                                                                   | 0.31     | 0.37      | 0.34  | 0.19     | 0.28     | 0.61     | 0.43      |                              |      |
| N00621008<br>14470/10   | D0           | 0.37                                                                                                                                   | 0.21     | 0.64      | 0.67  | 0.50     | 0.40     | 0.32     | 0.36      | 6                            | 1    |
|                         | D35          | 0.48                                                                                                                                   | 0.25     | 0.80      | 0.74  | 0.73     | 0.71     | 0.19     | 0.47      |                              |      |
|                         | D308         | 0.37                                                                                                                                   | 0.27     | 0.58      | 0.63  | 0.55     | 0.59     | 0.09     | 0.33      |                              |      |
| N00621011<br>4590/5     | D0           | 0.49                                                                                                                                   | 0.42     | 0.57      | 0.84  | 0.36     | 0.59     | 0.36     | 0.86      | 7                            | 5    |
|                         | D35          | 0.59                                                                                                                                   | 0.60     | 1.11      | 0.91  | 0.54     | 0.89     | 0.52     | 1.33      |                              |      |
|                         | D308         | 0.56                                                                                                                                   | 0.52     | 0.78      | 0.74  | 0.41     | 0.70     | 0.31     | 1.05      |                              |      |
| N00621015<br>5240/10    | D0           | 0.22                                                                                                                                   | 0.22     | 0.29      | 0.49  | 0.08     | 0.51     | 0.07     | 0.37      | 7                            | 7    |
|                         | D35          | 0.61                                                                                                                                   | 0.53     | 0.87      | 0.86  | 0.41     | 0.58     | 0.53     | 1.01      |                              |      |
|                         | D308         | 0.42                                                                                                                                   | 0.42     | 0.60      | 0.74  | 0.33     | 0.56     | 0.33     | 0.74      |                              |      |
| N00621017<br>2520/8     | D0           | 0.70                                                                                                                                   | 0.77     | 0.67      | 0.87  | 0.62     | 0.79     | 0.86     | 0.78      | 4                            | 2    |
|                         | D35          | 0.80                                                                                                                                   | 0.85     | 0.76      | 0.74  | 0.84     | 0.82     | 1.05     | 0.97      |                              |      |
|                         | D308         | 0.78                                                                                                                                   | 0.76     | 0.68      | 0.72  | 0.85     | 0.75     | 0.96     | 0.69      |                              |      |
| N00621024<br>3980/10    | D0           | 0.70                                                                                                                                   | 0.83     | 0.64      | 1.09  | 0.57     | 0.79     | 0.73     | 0.84      | 5                            | 2    |
|                         | D35          | 0.83                                                                                                                                   | 0.90     | 0.85      | 1.36  | 0.68     | 0.92     | 0.80     | 1.00      |                              |      |
|                         | D308         | 0.77                                                                                                                                   | 0.93     | 0.70      | 1.14  | 0.66     | 0.88     | 0.83     | 0.93      |                              |      |
| N00621026<br>6820/7     | D0           | 0.58                                                                                                                                   | 0.89     | 0.75      | 0.72  | 0.67     | 0.80     | 0.85     | 0.76      | 8                            | 0    |
|                         | D35          | 0.94                                                                                                                                   | 1.25     | 1.02      | 0.95  | 0.80     | 1.31     | 1.03     | 1.13      |                              |      |
|                         | D308         | 0.66                                                                                                                                   | 0.84     | 0.74      | 0.61  | 0.66     | 0.73     | 0.92     | 0.67      |                              |      |
| N00621030<br>16740/10   | D0           | 0.15                                                                                                                                   | 0.23     | 0.40      | 0.47  | 0.22     | 0.44     | 0.64     | 0.49      | 8                            | 8    |
|                         | D35          | 0.34                                                                                                                                   | 1.03     | 0.90      | 0.83  | 1.43     | 1.26     | 0.74     | 1.17      |                              |      |
|                         | D308         | 0.38                                                                                                                                   | 1.02     | 1.07      | 1.04  | 1.53     | 1.34     | 0.91     | 1.46      |                              |      |
| N00621031<br>11190/10   | D0           | 0.30                                                                                                                                   | 0.30     | 0.23      | 0.31  | 0.18     | 0.25     | 0.43     | 0.38      | 8                            | 7    |
|                         | D35          | 2.07                                                                                                                                   | 0.70     | 1.68      | 0.63  | 1.30     | 1.00     | 0.76     | 1.15      |                              |      |
|                         | D308         | 0.89                                                                                                                                   | 0.54     | 0.85      | 0.35  | 0.73     | 0.55     | 0.59     | 0.67      |                              |      |
| N00621034<br>4080/6     | D0           | 0.30                                                                                                                                   | 0.21     | 0.42      | 0.53  | 0.33     | 0.13     | 0.32     | 0.45      | 4                            | 7    |
|                         | D35          | 0.45                                                                                                                                   | 0.41     | 0.59      | 0.54  | 0.39     | 0.47     | 0.41     | 0.54      |                              |      |
|                         | D308         | 0.41                                                                                                                                   | 0.32     | 0.51      | 0.55  | 0.44     | 0.35     | 0.47     | 0.60      |                              |      |
| N00621037<br>8050/5     | D0           | 0.32                                                                                                                                   | 0.24     | 0.23      | 0.28  | 0.23     | 0.48     | 0.44     | 0.54      | 8                            | 8    |
|                         | D35          | 0.84                                                                                                                                   | 1.46     | 0.61      | 1.43  | 1.41     | 1.74     | 1.12     | 1.57      |                              |      |
|                         | D308         | 0.52                                                                                                                                   | 0.84     | 0.36      | 1.17  | 1.02     | 1.24     | 0.72     | 1.09      |                              |      |
| N00621042 P<br>40/0     | D0           | 0.62                                                                                                                                   | 0.58     | 0.42      | 0.56  | 0.37     | 0.55     | 0.41     | 0.42      | 0                            | 0    |
|                         | D35          | 0.11                                                                                                                                   | 0.19     | 0.15      | 0.18  | 0.08     | 0.13     | 0.10     | 0.17      |                              |      |
|                         | D308         | 0.67                                                                                                                                   | 0.59     | 0.51      | 0.52  | 0.25     | 0.46     | 0.31     | 0.30      |                              |      |
| N00621043<br>2110/9     | D0           | 0.61                                                                                                                                   | 0.53     | 0.52      | 0.65  | 0.19     | 0.60     | 0.52     | 0.42      | 3                            | 8    |
|                         | D35          | 0.70                                                                                                                                   | 0.60     | 0.60      | 0.76  | 0.24     | 0.71     | 0.63     | 0.56      |                              |      |
|                         | D308         | 0.89                                                                                                                                   | 0.68     | 0.78      | 0.83  | 0.41     | 0.85     | 0.80     | 0.62      |                              |      |
| N00621045<br>2310/8     | D0           | 0.82                                                                                                                                   | 0.81     | 0.94      | 1.03  | 0.59     | 0.82     | 0.74     | 0.85      | 4                            | 0    |
|                         | D35          | 0.67                                                                                                                                   | 0.91     | 0.85      | 0.82  | 0.41     | 1.16     | 0.90     | 1.11      |                              |      |
|                         | D308         | 0.78                                                                                                                                   | 0.87     | 0.91      | 0.93  | 0.50     | 0.80     | 0.68     | 0.74      |                              |      |
| N00621047<br>3390/10    | D0           | 0.78                                                                                                                                   | 0.52     | 0.70      | 0.77  | 0.53     | 0.52     | 0.68     | 0.58      | 8                            | 8    |
|                         | D35          | 1.19                                                                                                                                   | 0.92     | 1.19      | 1.28  | 1.00     | 0.92     | 1.17     | 1.05      |                              |      |
|                         | D308         | 1.26                                                                                                                                   | 0.89     | 1.10      | 1.05  | 0.96     | 1.02     | 1.18     | 1.00      |                              |      |

Table S6B: Cross-clade HIV inhibition *in vitro* (KWTRP)



| Volunteer<br>Magn/Pools | Visit<br>day | Log <sub>10</sub> RLU reduction for CD4 <sup>+</sup> /CD8 <sup>+</sup> T-cell co-cultures compared with CD4 <sup>+</sup> T cells alone |          |           |       |          |          |          |           | IMC inhibited<br>per subject  |      |
|-------------------------|--------------|----------------------------------------------------------------------------------------------------------------------------------------|----------|-----------|-------|----------|----------|----------|-----------|-------------------------------|------|
|                         |              | A                                                                                                                                      | A        | A/D       | B     | C        | C        | C        | D         | ≥0·1 log <sub>10</sub><br>D35 | D308 |
|                         |              | R.175019                                                                                                                               | R.175090 | UG.191947 | CH077 | Z.235219 | Z.235227 | Z.235092 | UG.191882 |                               |      |
| N00622003<br>490/4      | D0           | 0·46                                                                                                                                   | 0·70     | 0·53      | 0·68  | 0·53     | 0·64     | 0·55     | 0·72      | 0                             | 1    |
|                         | D35          | 0·44                                                                                                                                   | 0·78     | 0·62      | 0·69  | 0·42     | 0·63     | 0·48     | 0·79      |                               |      |
|                         | D308         | 0·54                                                                                                                                   | 0·80     | 0·58      | 0·73  | 0·39     | 0·65     | 0·54     | 0·77      |                               |      |
| N00622006<br>3170/10    | D0           | 0·94                                                                                                                                   | 0·81     | 0·88      | 0·85  | 0·72     | 0·81     | 0·87     | 0·71      | 8                             | 7    |
|                         | D35          | 1·17                                                                                                                                   | 1·16     | 1·22      | 1·14  | 1·14     | 1·08     | 1·37     | 1·09      |                               |      |
|                         | D308         | 1·18                                                                                                                                   | 1·03     | 0·90      | 1·04  | 0·83     | 0·96     | 1·20     | 0·90      |                               |      |
| N00622014<br>4060/9     | D0           | 0·52                                                                                                                                   | 0·74     | 0·57      | 0·74  | 0·52     | 0·73     | 0·58     | 0·75      | 4                             | 6    |
|                         | D35          | 0·60                                                                                                                                   | 1·06     | 0·84      | 0·77  | 0·58     | 0·71     | 0·78     | 0·96      |                               |      |
|                         | D308         | 0·65                                                                                                                                   | 0·94     | 0·69      | 0·88  | 0·59     | 0·81     | 0·74     | 0·90      |                               |      |
| N00622015 P<br>20/0     | D0           | 1·08                                                                                                                                   | 0·91     | 0·95      | 1·01  | 0·52     | 1·04     | 0·70     | 1·04      | 0                             | 0    |
|                         | D35          | 0·84                                                                                                                                   | 0·70     | 0·72      | 0·82  | 0·35     | 0·77     | 0·47     | 0·83      |                               |      |
|                         | D308         | 0·90                                                                                                                                   | 0·70     | 0·74      | 0·83  | 0·42     | 0·85     | 0·50     | 0·83      |                               |      |
| N00622019<br>1020/9     | D0           | 0·51                                                                                                                                   | 0·67     | 0·68      | 0·66  | 0·35     | 0·69     | 0·57     | 0·69      | 3                             | 0    |
|                         | D35          | 0·71                                                                                                                                   | 0·64     | 0·79      | 0·64  | 0·37     | 0·83     | 0·46     | 0·69      |                               |      |
|                         | D308         | 0·37                                                                                                                                   | 0·53     | 0·43      | 0·52  | 0·11     | 0·49     | 0·31     | 0·45      |                               |      |
| N00622024<br>1590/8     | D0           | 0·66                                                                                                                                   | 0·71     | 0·57      | 0·73  | 0·43     | 1·22     | 0·56     | 1·03      | 4                             | 3    |
|                         | D35          | 0·83                                                                                                                                   | 0·95     | 0·92      | 0·98  | 0·32     | 0·75     | 0·54     | 0·82      |                               |      |
|                         | D308         | 0·78                                                                                                                                   | 0·85     | 0·70      | 0·82  | 0·47     | 0·90     | 0·60     | 0·94      |                               |      |
| N00622027<br>1715/7     | D0           | 0·94                                                                                                                                   | 0·83     | 0·84      | 1·04  | 0·55     | 0·90     | 0·68     | 0·86      | 5                             | 6    |
|                         | D35          | 1·05                                                                                                                                   | 0·90     | 0·97      | 1·08  | 0·69     | 1·02     | 0·83     | 1·00      |                               |      |
|                         | D308         | 1·10                                                                                                                                   | 0·95     | 1·01      | 1·08  | 0·70     | 0·95     | 0·80     | 0·95      |                               |      |
| N00622031<br>530/1      | D0           | 0·48                                                                                                                                   | 0·64     | 0·50      | 0·56  | 0·25     | 0·62     | 0·24     | 0·56      | 4                             | 2    |
|                         | D35          | 1·59                                                                                                                                   | 0·75     | 1·68      | 0·64  | 0·27     | 0·65     | 0·23     | 1·05      |                               |      |
|                         | D308         | 0·65                                                                                                                                   | 0·66     | 0·60      | 0·53  | 0·23     | 0·54     | 0·25     | 0·58      |                               |      |
| N00622038<br>4430/10    | D0           | 0·42                                                                                                                                   | 0·49     | 0·59      | 0·62  | 0·43     | 0·75     | 0·26     | 0·62      | 8                             | 8    |
|                         | D35          | 1·08                                                                                                                                   | 1·82     | 1·35      | 2·02  | 2·40     | 2·49     | 1·52     | 2·15      |                               |      |
|                         | D308         | 0·76                                                                                                                                   | 1·24     | 0·93      | 1·38  | 1·47     | 1·60     | 0·73     | 1·52      |                               |      |
| N00622040<br>800/4      | D0           | 0·69                                                                                                                                   | 0·42     | 0·57      | 0·45  | 0·33     | 0·58     | 0·54     | 0·54      | 7                             | 7    |
|                         | D35          | 0·78                                                                                                                                   | 1·43     | 0·87      | 1·95  | 1·79     | 1·84     | 1·34     | 1·66      |                               |      |
|                         | D308         | 0·78                                                                                                                                   | 0·85     | 0·85      | 1·23  | 1·01     | 1·27     | 0·83     | 1·01      |                               |      |
| N00622047<br>730/6      | D0           | 0·54                                                                                                                                   | 0·68     | 0·50      | 0·64  | 0·19     | 0·64     | 0·32     | 0·65      | 4                             |      |
|                         | D35          | 0·71                                                                                                                                   | 0·77     | 0·55      | 0·64  | 0·34     | 1·15     | 0·57     | 0·68      |                               |      |
|                         | D308         | nd                                                                                                                                     | nd       | nd        | nd    | nd       | nd       | nd       | nd        |                               |      |
| N00622048<br>2380/8     | D0           | 0·50                                                                                                                                   | 0·60     | 0·75      | 0·70  | 0·37     | 0·79     | 0·73     | 0·99      | 6                             | 3    |
|                         | D35          | 0·75                                                                                                                                   | 0·89     | 1·41      | 0·73  | 0·53     | 1·28     | 0·82     | 1·71      |                               |      |
|                         | D308         | 0·50                                                                                                                                   | 0·62     | 0·89      | 0·60  | 0·38     | 0·88     | 0·66     | 1·20      |                               |      |
| N00622052<br>2330/10    | D0           | 0·52                                                                                                                                   | 0·46     | 0·68      | 0·61  | 0·53     | 0·67     | 0·60     | 0·62      | 8                             | 8    |
|                         | D35          | 1·33                                                                                                                                   | 1·42     | 1·69      | 1·63  | 1·42     | 1·52     | 1·57     | 1·72      |                               |      |
|                         | D308         | 1·08                                                                                                                                   | 1·14     | 1·35      | 1·40  | 1·22     | 1·18     | 1·37     | 1·45      |                               |      |
| N00622053<br>2510/10    | D0           | 0·84                                                                                                                                   | 0·66     | 0·80      | 0·79  | 0·34     | 0·73     | 0·65     | 0·70      | 8                             | 8    |
|                         | D35          | 1·64                                                                                                                                   | 1·52     | 1·78      | 1·32  | 0·88     | 1·35     | 1·11     | 1·44      |                               |      |
|                         | D308         | 1·18                                                                                                                                   | 0·95     | 1·24      | 1·11  | 0·55     | 0·97     | 0·87     | 1·04      |                               |      |
| N00622056<br>740/4      | D0           | 0·48                                                                                                                                   | 0·68     | 0·78      | 0·70  | 0·46     | 0·92     | 0·62     | 0·80      | 7                             | 8    |
|                         | D35          | 0·67                                                                                                                                   | 1·00     | 0·98      | 0·93  | 0·58     | 1·25     | 0·68     | 1·12      |                               |      |
|                         | D308         | 0·60                                                                                                                                   | 0·85     | 0·91      | 0·89  | 0·59     | 1·15     | 0·72     | 1·00      |                               |      |
| N00622060<br>6940/10    | D0           | 0·36                                                                                                                                   | 0·29     | 0·46      | 0·42  | 0·27     | 0·27     | 0·10     | 0·39      | 6                             | 6    |
|                         | D35          | 0·51                                                                                                                                   | 0·43     | 0·65      | 0·42  | 0·23     | 0·40     | 0·70     | 1·04      |                               |      |
|                         | D308         | 0·55                                                                                                                                   | 0·44     | 0·64      | 0·50  | 0·33     | 0·41     | 0·43     | 0·69      |                               |      |

Table S6C: Cross-clade HIV inhibition *in vitro* (KAVI-ICR)

| Volunteer<br>Magn/Pool | Visit<br>day | Log <sub>10</sub> RLU reduction for CD4 <sup>+</sup> /CD8 <sup>+</sup> T-cell co-cultures compared with CD4 <sup>+</sup> T cells alone |          |           |       |          |          |          |           | IMC inhibited<br>per subject |      |
|------------------------|--------------|----------------------------------------------------------------------------------------------------------------------------------------|----------|-----------|-------|----------|----------|----------|-----------|------------------------------|------|
|                        |              | A                                                                                                                                      | A        | A/D       | B     | C        | C        | C        | D         | ≥0.1 log <sub>10</sub>       |      |
|                        |              | R.175019                                                                                                                               | R.175090 | UG.191947 | CH077 | Z.235219 | Z.235227 | Z.235092 | UG.191882 | D 35                         | D308 |
| N00623003<br>1550/5    | D0           | 0.14                                                                                                                                   | 0.16     | 0.17      | 0.38  | -0.10    | 0.21     | 0.04     | 0.62      | 5                            | 2    |
|                        | D35          | 0.27                                                                                                                                   | 0.24     | 0.35      | 0.42  | 0.04     | 0.42     | 0.10     | 0.56      |                              |      |
|                        | D308         | 0.15                                                                                                                                   | 0.17     | 0.29      | 0.42  | -0.02    | 0.43     | 0.07     | 0.60      |                              |      |
| N00623006<br>610/3     | D0           | 0.21                                                                                                                                   | 0.16     | 0.23      | 0.40  | -0.05    | 0.30     | 0.13     | 0.40      | 1                            | 3    |
|                        | D35          | 0.14                                                                                                                                   | 0.15     | 0.25      | 0.33  | 0.18     | 0.30     | 0.15     | 0.38      |                              |      |
|                        | D308         | 0.36                                                                                                                                   | 0.28     | 0.24      | 0.45  | 0.04     | 0.34     | 0.20     | 0.50      |                              |      |
| N00623008<br>655/4     | D0           | -0.06                                                                                                                                  | 0.04     | 0.10      | 0.14  | -0.01    | 0.01     | 0.10     | 0.21      | 8                            | 7    |
|                        | D35          | 0.17                                                                                                                                   | 0.92     | 0.74      | 1.12  | 0.93     | 0.79     | 0.69     | 1.17      |                              |      |
|                        | D308         | -0.02                                                                                                                                  | 0.15     | 0.35      | 0.42  | 0.14     | 0.25     | 0.22     | 0.49      |                              |      |
| N00623010<br>1910/6    | D0           | 0.35                                                                                                                                   | 0.24     | 0.35      | 0.38  | 0.25     | 0.48     | 0.40     | 0.47      | 8                            | 7    |
|                        | D35          | 0.81                                                                                                                                   | 1.04     | 0.73      | 1.30  | 1.24     | 1.37     | 0.59     | 1.14      |                              |      |
|                        | D308         | 0.53                                                                                                                                   | 0.44     | 0.44      | 0.72  | 0.65     | 0.69     | 0.47     | 0.64      |                              |      |
| N00623011<br>2590/8    | D0           | 0.75                                                                                                                                   | 0.24     | 0.56      | 0.38  | 0.18     | 0.39     | 0.06     | 0.48      | 8                            | 5    |
|                        | D35          | 1.02                                                                                                                                   | 0.48     | 0.96      | 0.67  | 0.52     | 0.81     | 0.23     | 0.77      |                              |      |
|                        | D308         | 0.94                                                                                                                                   | 0.46     | 0.85      | 0.56  | 0.23     | 0.54     | 0.11     | 0.57      |                              |      |
| N00623015<br>1000/8    | D0           | 0.81                                                                                                                                   | 0.64     | 0.70      | 0.80  | 0.32     | 0.65     | 0.80     | 0.55      | 4                            | 0    |
|                        | D35          | 0.87                                                                                                                                   | 0.74     | 0.84      | 0.89  | 0.48     | 0.81     | 0.87     | 0.60      |                              |      |
|                        | D308         | 0.78                                                                                                                                   | 0.58     | 0.70      | 0.70  | 0.35     | 0.65     | 0.75     | 0.44      |                              |      |
| N00623017<br>1315/5    | D0           | 0.27                                                                                                                                   | 0.23     | 0.36      | 0.35  | 0.43     | 0.47     | 0.61     | 0.43      | 6                            | 3    |
|                        | D35          | 0.71                                                                                                                                   | 0.76     | 0.71      | 0.72  | 0.47     | 0.74     | 0.68     | 0.70      |                              |      |
|                        | D308         | 0.36                                                                                                                                   | 0.35     | 0.39      | 0.50  | 0.32     | 0.46     | 0.49     | 0.62      |                              |      |
| N00623018<br>1560/10   | D0           | 0.37                                                                                                                                   | 0.21     | 0.34      | 0.52  | 0.42     | 0.27     | 0.45     | 0.40      | 8                            | 8    |
|                        | D35          | 1.07                                                                                                                                   | 1.20     | 0.99      | 1.43  | 0.84     | 1.45     | 1.49     | 1.23      |                              |      |
|                        | D308         | 0.66                                                                                                                                   | 0.84     | 0.79      | 0.94  | 0.57     | 0.98     | 1.23     | 0.97      |                              |      |
| N00623020<br>500/2     | D0           | 0.16                                                                                                                                   | 0.33     | 0.24      | 0.32  | 0.01     | 0.32     | ivg      | 0.45      | 7                            | 6    |
|                        | D35          | 1.01                                                                                                                                   | 0.54     | 1.00      | 0.56  | 0.26     | 1.22     | ivg      | 1.07      |                              |      |
|                        | D308         | 0.38                                                                                                                                   | 0.42     | 0.47      | 0.47  | 0.19     | 0.57     | ivg      | 0.61      |                              |      |
| N00623021<br>2070/9    | D0           | 0.06                                                                                                                                   | 0.01     | 0.07      | -0.02 | 0.10     | 0.03     | 0.02     | 0.01      | 8                            |      |
|                        | D35          | 0.57                                                                                                                                   | 0.13     | 0.87      | 0.48  | 0.21     | 0.79     | 0.12     | 0.62      |                              |      |
|                        | D308         | nd                                                                                                                                     | nd       | nd        | nd    | nd       | nd       | nd       | nd        |                              |      |
| N00623022<br>1080/4    | D0           | 0.32                                                                                                                                   | 0.55     | 0.51      | 0.65  | 0.15     | 0.53     | 0.49     | 0.58      | 7                            | 2    |
|                        | D35          | 0.54                                                                                                                                   | 0.98     | 1.24      | 0.84  | 0.23     | 1.05     | 0.90     | 1.53      |                              |      |
|                        | D308         | 0.34                                                                                                                                   | 0.57     | 0.65      | 0.60  | 0.12     | 0.56     | 0.49     | 0.68      |                              |      |
| N00623025<br>750/5     | D0           | 0.72                                                                                                                                   | 0.60     | 0.66      | 0.93  | 0.86     | 0.82     | 0.57     | 0.72      | 1                            | 0    |
|                        | D35          | 0.79                                                                                                                                   | 0.86     | 0.69      | 0.79  | 0.78     | 0.73     | 0.48     | 0.76      |                              |      |
|                        | D308         | 0.63                                                                                                                                   | 0.59     | 0.59      | 0.73  | 0.70     | 0.70     | 0.49     | 0.56      |                              |      |
| N00623027<br>3115/4    | D0           | 0.22                                                                                                                                   | 0.25     | 0.33      | 0.37  | 0.24     | 0.34     | 0.30     | 0.41      | 8                            | 7    |
|                        | D35          | 0.44                                                                                                                                   | 0.52     | 0.80      | 0.48  | 0.48     | 1.63     | 1.54     | 1.07      |                              |      |
|                        | D308         | 0.41                                                                                                                                   | 0.43     | 0.54      | 0.47  | 0.15     | 0.54     | 0.69     | 0.78      |                              |      |

**Table S7D: Cross-clade HIV inhibition *in vitro* (CFHRZ)**

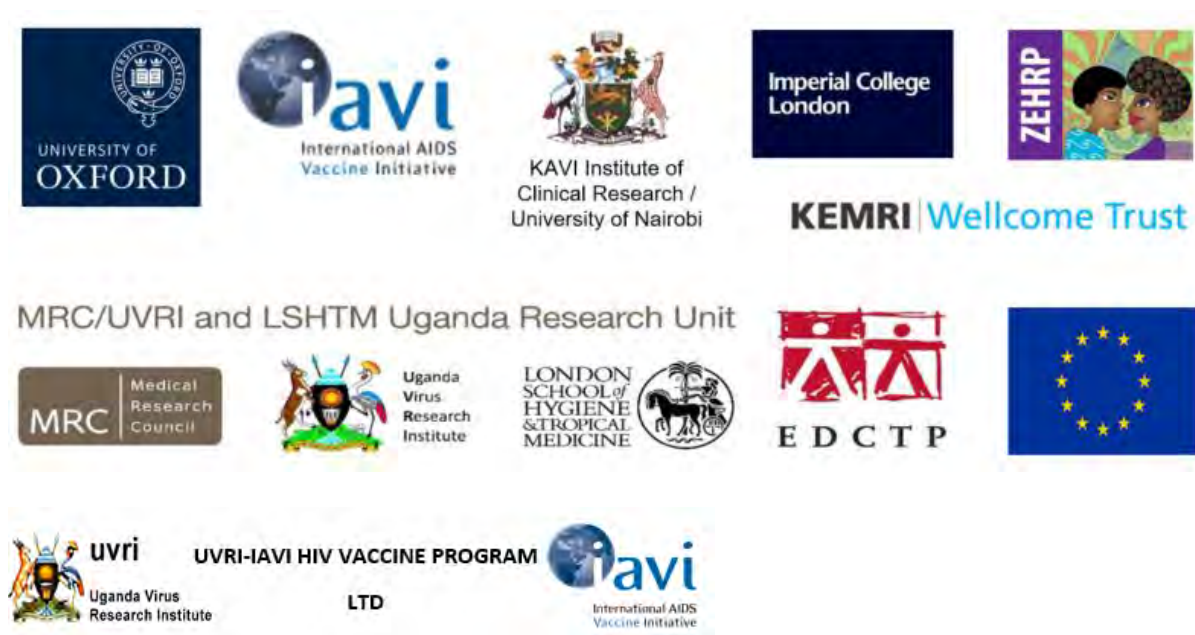

**Trial Title: A Phase 1 Trial of ChAdOx1- and MVA-vectored Conserved Mosaic HIV-1 Vaccines in Healthy, Adult HIV-1-negative Volunteers in Eastern and Southern Africa.**

**Internal Reference Number / Short title: HIV-CORE 006**

**Ethics Ref: OXTREC Ref: 56-19**

**Date and Version No: version 4.0, 01 December 2021**

**Chief Investigator:**

Dr Paola Cicconi, MD, PhD  
The Jenner Institute  
University of Oxford  
Centre for Clinical Vaccinology and Tropical Medicine (CCVTM)  
Churchill Hospital, Old Road  
Oxford OX3 7LE  
United Kingdom  
Phone: +44 (0)1865 611413  
Email: [paola.cicconi@ndm.ox.ac.uk](mailto:paola.cicconi@ndm.ox.ac.uk)

**Chief Non-Clinical Investigator:** Professor Tomáš Hanke, BSc, MSc, PhD  
The Jenner Institute  
University of Oxford  
Old Road Campus Research Building  
Roosevelt Drive  
Oxford OX3 7DQ  
United Kingdom  
Phone: +44 (0)1865 617630  
Email: [tomas.hanke@ndm.ox.ac.uk](mailto:tomas.hanke@ndm.ox.ac.uk)

**Principal Investigators:** Professor Walter Jaoko, MBChB, MTropMed, PhD,  
Department of Medical Microbiology  
University of Nairobi  
Second Floor, PO Box 19676-00202  
Off Ngong Road, Nairobi  
Kenya  
Phone: +254-2-2717694 / +254 727555254  
Email: [wjaoko@kviuon.org](mailto:wjaoko@kviuon.org)

William Kilembe, MBChB, MSc,  
Center for Family Health Research in Zambia  
B22/F737 Mwembelelo Road  
Emmasdale, Lusaka  
Zambia  
Phone: +260 966862787/ +260 966851820  
Email: [wkilembe@rzhrg-mail.org](mailto:wkilembe@rzhrg-mail.org)

Prof. Eduard Sanders, MD, MPH, PhD  
KEMRI/ Wellcome Trust Research Programme  
Hospital Road  
P.O. Box 230-80108 Kilifi,  
Kenya.  
Phone: +254 723593762  
Email: [ESanders@kemri-wellcome.org](mailto:ESanders@kemri-wellcome.org)

Pontiano Kaleebu, MBChB, PhD  
MRC/UVRI & LSHTM, Uganda Research Unit  
P.O.BOX 49 Entebbe,  
Uganda.  
Tel: +256 417 704 103  
E-mail: [Pontiano.Kaleebu@mrcuganda.org](mailto:Pontiano.Kaleebu@mrcuganda.org)

**Sponsor:** University of Oxford, United Kingdom

**Funder:** European and Developing Countries Clinical Trials Partnership

## TABLE OF CONTENTS

|       |                                                             |    |
|-------|-------------------------------------------------------------|----|
| 1     | KEY TRIAL CONTACTS.....                                     | 7  |
| 2     | SYNOPSIS .....                                              | 11 |
|       | ABBREVIATIONS.....                                          | 14 |
| 3     | BACKGROUND AND RATIONALE.....                               | 15 |
| 4     | OBJECTIVES AND OUTCOME MEASURES.....                        | 21 |
| 5     | TRIAL DESIGN.....                                           | 22 |
| 6     | VOLUNTEER IDENTIFICATION .....                              | 23 |
| 6.1   | Study Population .....                                      | 23 |
| 6.2   | Inclusion Criteria.....                                     | 23 |
| 6.3   | Exclusion Criteria .....                                    | 23 |
| 6.4   | Recruitment of Volunteers .....                             | 25 |
| 7     | TRIAL VISITS .....                                          | 25 |
| 7.1   | Screening and Eligibility Assessment.....                   | 25 |
| 7.2   | Investigational Medicinal Product Administration Visit..... | 26 |
| 7.2.1 | Vaccination Visit .....                                     | 26 |
| 7.2.2 | Post Vaccination Visits.....                                | 27 |
| 7.3   | Additional Follow-up Visits.....                            | 28 |
| 7.4   | Final Study Visit or Early Termination Visit .....          | 28 |
| 7.5   | Unscheduled Visits .....                                    | 28 |
| 8     | STUDY PROCEDURES .....                                      | 28 |
| 8.1   | Informed Consent Process .....                              | 28 |
| 8.1.1 | Consent for Future Use of Samples.....                      | 30 |
| 8.2   | Medical History and Physical Examination.....               | 30 |
| 8.3   | HIV Testing and HIV- test Counselling.....                  | 30 |
| 8.4   | Combination prevention of HIV acquisition.....              | 31 |
| 8.5   | Family Planning Counselling.....                            | 31 |
| 8.6   | Randomisation, blinding and unblinding.....                 | 32 |
| 8.7   | Un-blinding Procedure for Individual Volunteer .....        | 32 |
| 8.8   | Sample Handling.....                                        | 32 |
| 9     | INVESTIGATIONAL MEDICINAL PRODUCT (IMP) .....               | 33 |
| 9.1   | IMP Description .....                                       | 33 |
| 9.2   | Shipment and Storage of IMP .....                           | 34 |

|        |                                                                           |    |
|--------|---------------------------------------------------------------------------|----|
| 9.3    | Preparation of Investigational Medicinal Product (IMP).....               | 35 |
| 9.4    | Administration of Investigational Medicinal Product .....                 | 35 |
| 9.5    | Accountability and Disposal of the Investigational Medicinal Product..... | 35 |
| 10     | ASSESSMENTS.....                                                          | 36 |
| 10.1   | Safety Assessments .....                                                  | 36 |
| 10.1.1 | Local reactogenicity.....                                                 | 36 |
| 10.1.2 | Systemic reactogenicity.....                                              | 36 |
| 10.1.3 | Unsolicited Adverse Events .....                                          | 36 |
| 10.1.4 | Assessment of Lymph Nodes.....                                            | 36 |
| 10.1.5 | Vital Signs .....                                                         | 37 |
| 10.1.6 | Concomitant Medications .....                                             | 37 |
| 10.1.7 | Routine laboratory parameters.....                                        | 37 |
| 10.1.8 | Specific screening tests.....                                             | 38 |
| 10.2   | Immunogenicity Assessments .....                                          | 38 |
| 10.2.1 | Cellular Responses.....                                                   | 38 |
| 10.2.2 | Antibody Responses .....                                                  | 38 |
| 10.2.3 | PBMC, Serum and Plasma Storage .....                                      | 38 |
| 10.3   | Other Assessments.....                                                    | 39 |
| 10.3.1 | HLA Typing.....                                                           | 39 |
| 10.3.2 | Microbiome Testing.....                                                   | 39 |
| 10.3.3 | HIV testing .....                                                         | 39 |
| 10.3.4 | Pregnancy Test .....                                                      | 39 |
| 10.3.5 | HIV Risk Assessment.....                                                  | 39 |
| 10.3.6 | Social Impact Assessment.....                                             | 39 |
| 11     | SAFETY REPORTING .....                                                    | 40 |
| 11.1   | Definitions .....                                                         | 40 |
| 11.2   | Causality .....                                                           | 41 |
| 11.3   | Assessment of Severity of Adverse Events.....                             | 42 |
| 11.4   | Procedures for Recording Adverse Events .....                             | 42 |
| 11.5   | Reporting Procedures for Serious Adverse Events.....                      | 42 |
| 11.6   | Expectedness.....                                                         | 43 |
| 11.7   | SUSAR Reporting .....                                                     | 43 |
| 11.8   | Clinical Management of Adverse Events.....                                | 43 |
| 11.9   | Pregnancy .....                                                           | 44 |
| 11.10  | Intercurrent HIV Infection .....                                          | 44 |

|         |                                                                                    |    |
|---------|------------------------------------------------------------------------------------|----|
| 11.11   | SAFETY OVERSIGHT.....                                                              | 45 |
| 11.11.1 | Protocol Safety Review Team (PSRT).....                                            | 45 |
| 11.11.2 | Data Monitoring and Ethics Committee (DMEC).....                                   | 45 |
| 11.11.3 | Content of Interim Safety Review .....                                             | 45 |
| 11.11.4 | Criteria for Pausing the Study.....                                                | 46 |
| 12      | MANAGEMENT OF HIV ISSUES DURING AND FOLLOWING STUDY .....                          | 46 |
| 12.1    | HIV Testing.....                                                                   | 46 |
| 12.2    | Social Discrimination as a Result of an Antibody Response to Vaccine .....         | 47 |
| 12.3    | HIV Infection.....                                                                 | 47 |
| 12.3.1  | Counselling .....                                                                  | 47 |
| 12.3.2  | Referral for Support /Care.....                                                    | 47 |
| 13      | DISCONTINUATION OF VACCINATIONS AND/OR WITHDRAWAL FROM STUDY .....                 | 48 |
| 13.1    | Discontinuations of Vaccinations .....                                             | 48 |
| 13.2    | Deferral of Vaccinations .....                                                     | 49 |
| 13.3    | Follow up after Discontinuation of Further Vaccinations .....                      | 49 |
| 13.4    | Withdrawal from the Study (Early Termination).....                                 | 50 |
| 14      | STATISTICS .....                                                                   | 50 |
| 14.1    | Description of Statistical Methods .....                                           | 50 |
| 14.1.1  | Analysis of demographics.....                                                      | 50 |
| 14.1.2  | Analysis of safety .....                                                           | 50 |
| 14.1.3  | Analysis of immunogenicity.....                                                    | 51 |
| 14.2    | The Number of Volunteers.....                                                      | 51 |
| 14.3    | The Level of Statistical Significance.....                                         | 53 |
| 14.4    | Criteria for the Termination of the Trial.....                                     | 53 |
| 14.5    | Procedure for Accounting for Missing, Unused, and Spurious Data.....               | 53 |
| 14.6    | Analysis Populations.....                                                          | 53 |
| 14.6.1  | Safety Population .....                                                            | 53 |
| 14.6.2  | Per Protocol Population (PP Population).....                                       | 53 |
| 14.6.3  | Unblinded Volunteers.....                                                          | 54 |
| 14.7    | Procedures for Reporting any Deviation(s) from the Original Statistical Plan ..... | 54 |
| 15      | DATA MANAGEMENT .....                                                              | 54 |
| 15.1    | Source Data .....                                                                  | 54 |
| 15.2    | Access to Data .....                                                               | 54 |
| 15.3    | Data Recording and Record Keeping.....                                             | 54 |
| 15.4    | DATA ENTRY AT STUDY SITE .....                                                     | 54 |

|      |                                                                    |    |
|------|--------------------------------------------------------------------|----|
| 16   | QUALITY ASSURANCE PROCEDURES .....                                 | 55 |
| 17   | DATA AND BIOLOGICAL MATERIAL .....                                 | 55 |
| 18   | ADMINISTRATIVE STRUCTURE.....                                      | 55 |
| 18.1 | Study Supervision .....                                            | 55 |
| 18.2 | Study Monitoring.....                                              | 55 |
| 18.3 | Investigator's Records .....                                       | 56 |
| 19   | SERIOUS BREACHES .....                                             | 56 |
| 20   | ETHICAL AND REGULATORY CONSIDERATIONS.....                         | 57 |
| 20.1 | Declaration of Helsinki Guidelines for Good Clinical Practice..... | 57 |
| 20.2 | Approvals.....                                                     | 57 |
| 20.3 | Reporting.....                                                     | 57 |
| 20.4 | Volunteer Confidentiality .....                                    | 57 |
| 20.5 | Expenses and Benefits.....                                         | 57 |
| 21   | FINANCE AND INSURANCE .....                                        | 58 |
| 21.1 | Funding.....                                                       | 58 |
| 21.2 | Indemnity .....                                                    | 58 |
| 21.3 | Insurance .....                                                    | 58 |
| 22   | PUBLICATION POLICY.....                                            | 58 |
| 23   | REFERENCES .....                                                   | 60 |
| 24   | APPENDIX A: SCHEDULE OF PROCEDURES .....                           | 64 |
| 25   | APPENDIX B: AMENDMENT HISTORY .....                                | 67 |
| 26   | APPENDIX C: ADVERSE EVENT SEVERITY ASSESSMENT TABLE.....           | 68 |



## 1 KEY TRIAL CONTACTS

|                             |  |                                                                                                                                                                                                                                                                                                                                                                                                                                                                                                                                                                                                                                                                                                     |
|-----------------------------|--|-----------------------------------------------------------------------------------------------------------------------------------------------------------------------------------------------------------------------------------------------------------------------------------------------------------------------------------------------------------------------------------------------------------------------------------------------------------------------------------------------------------------------------------------------------------------------------------------------------------------------------------------------------------------------------------------------------|
| <b>Sponsor</b>              |  | University of Oxford,<br>Research Services<br>University Offices<br>Wellington Square, Oxford, OX1 2JD<br>Email: <a href="mailto:oxtrecrec@admin.ox.ac.uk">oxtrecrec@admin.ox.ac.uk</a>                                                                                                                                                                                                                                                                                                                                                                                                                                                                                                             |
| <b>Clinical Trials Unit</b> |  | Center for Family Health Research in Zambia (CFHRZ)<br>B22/F737 Mwembelelo Road<br>Lusaka, Zambia<br><br>KAVI– Institute for Clinical Research (KAVI-ICR)<br>College of Health Sciences, University of Nairobi<br>PO Box 19676- 00202, Nairobi, Kenya<br><br>The KEMRI-Wellcome Trust Research Programme (KWTRP)<br>Kenya Medical Research Institute (KEMRI) / Wellcome Trust<br>Centre for Geographic Medicine Research – Coast (CGMRC)<br>PO Box 230, Kilifi, Kenya<br><br>MRC/UVRI Uganda Research Unit on AIDS (MRC/UVRI)<br>Medical Research Council/UVRI Uganda Research Unit on AIDS. Uganda Virus Research Institute Plot 5159 Nakiwogo Road, Entebbe, Uganda<br>P.O.BOX 49 Entebbe, Uganda |
| <b>Committees</b>           |  | <u>Scientific Advisory Board (SAB)</u><br>Prof Christian Brander<br>Institut de Recerca de la Sida – IrsiCaixa<br>Hospital Germans Trias I Pujol,<br>Barcelona, 08916<br>Spain<br>Tel: 0034 93 465674<br>Email: <a href="mailto:cbrander@irsicaixa.es">cbrander@irsicaixa.es</a><br><br><u>Oxford Tropical Research Ethics Committee (OxtREC)</u>                                                                                                                                                                                                                                                                                                                                                   |

|                               |  |                                                                                                                                                                                                                                                                                                                                                                                                                                                                                                                                                                     |
|-------------------------------|--|---------------------------------------------------------------------------------------------------------------------------------------------------------------------------------------------------------------------------------------------------------------------------------------------------------------------------------------------------------------------------------------------------------------------------------------------------------------------------------------------------------------------------------------------------------------------|
|                               |  | <p>Chair: Prof Kevin Marsh<br/>         Named Contact: Dr Rebecca Bryant<br/>         University of Oxford<br/>         Research Services<br/>         University Offices<br/>         Wellington Square<br/>         Oxford, OX1 2JD<br/>         United Kingdom<br/>         Tel: +44 (0)1865 282585<br/>         e-mail: <a href="mailto:oxtrece@admin.ox.ac.uk">oxtrece@admin.ox.ac.uk</a></p>                                                                                                                                                                  |
| <b>Regulatory Authorities</b> |  | <p>National Drug Authority (NDA), Uganda,<br/>         P. O Box 23096, Kampala, Uganda.<br/>         Plot 19 Lumumba Avenue (opposite TWED plaza).<br/>         Phone: +256 417 788 100.</p> <p>Pharmacy and Poisons Board (PPB), Kenya,<br/>         P.O. Box 27663 – 00506, Nairobi.<br/>         Lenana Road Opposite DOD.<br/>         Phone: +254 720 608811.</p> <p>Zambia Medicines Regulatory Authority (ZAMRA), Zambia,<br/>         P.O. Box 31890 Lusaka, Zambia.<br/>         Tuleteka Road, Off Makishi Road.<br/>         Phone: +260 211 220 429</p> |
| <b>Funder</b>                 |  | <p>European and Developing Countries Clinical Trials Partnership<br/>         PO Box 93015<br/>         2509 AA The Hague,<br/>         The Netherlands<br/>         Tel: +31 70 344 0880<br/>         Fax: +31 70 344 0899</p>                                                                                                                                                                                                                                                                                                                                     |
| <b>Laboratories</b>           |  | <p>The Jenner Institute laboratories<br/>         University of Oxford<br/>         Old Road Campus Research Building<br/>         Roosevelt Drive<br/>         Oxford OX3 7DQ<br/>         United Kingdom</p>                                                                                                                                                                                                                                                                                                                                                      |

### Confidentiality Statement

This document contains confidential information that must not be disclosed to anyone other than the Sponsor, the Investigator Team, host organisation, and members of the Research Ethics Committee and other regulatory bodies. This information cannot be used for any purpose other than the evaluation or conduct of the clinical investigation without the prior written consent of Prof. Tomáš Hanke.

**Statement of Compliance**

The trial will be conducted in compliance with the protocol, the principles of Good Clinical Practice, Medicines for Human Use (Clinical Trial) Regulations 2004 (as amended) and all other applicable regulatory requirements.

**Chief Investigator approval and agreement**

I hereby approve this version of the protocol and declare no conflict of interest:

CI Details Dr. Paola Cicconi

| Name             | Signature                                                                            | Date                          |
|------------------|--------------------------------------------------------------------------------------|-------------------------------|
| Dr Paola Cicconi |  | 1 <sup>st</sup> December 2021 |

PI details *(insert PI's Details)*

| Name | Signature | Date |
|------|-----------|------|
|      |           |      |

**Modification History**

| Version | Date        | Author(s)                              | Modifications                                                                                                                                                                                                                                                                                                                                                                                                                                                                                                                                                                                           |
|---------|-------------|----------------------------------------|---------------------------------------------------------------------------------------------------------------------------------------------------------------------------------------------------------------------------------------------------------------------------------------------------------------------------------------------------------------------------------------------------------------------------------------------------------------------------------------------------------------------------------------------------------------------------------------------------------|
| 2.0     | 22 Jan 2020 | Paola Cicconi                          | <p>Section 1: Correction of Sponsor's contact details</p> <p>Sections 2 &amp; 3: Clarification of first in human phase</p> <p>Section 18.3: Clarification of the period Investigator records are kept.</p> <p>Table 9.1-1 Dose of placebo changed to 0.3-0.5 ml range in order to match the dose of the investigational vaccines.</p>                                                                                                                                                                                                                                                                   |
| 2.1     | 6 May 2020  | Alison Crook                           | Correction to section 7.2.1. The section on vaccination visits referred to Section 8.4. It has been corrected to refer to Section 9.4                                                                                                                                                                                                                                                                                                                                                                                                                                                                   |
| 3.0     | 14 Apr 2021 | Mabela Matsoso and Vincent Muturi-Kioi | <p>Page 2- Principal Investigators section: Change of site name from Zambia Emory HIV Research Project (ZEHRP) to Center for Family Health Research in Zambia (CFHRZ).</p> <p>Section 1: Change of site name from Zambia Emory HIV Research Project (ZEHRP) to Center for Family Health Research in Zambia (CFHRZ).</p> <p>Section 3.4: New rare risk of blood clotting associated with ChAdOx1 viral vector vaccine.</p> <p>Section 6.3: Revised two exclusion criteria to include vaccinations using adenoviral vectored vaccines.</p> <p>Section 15.4: Revised information on direct data entry.</p> |
| 4.0     | 01 Dec 2021 | Vincent Muturi-Kioi                    | Page 27 – Addition of provision of a dose of paracetamol prior to administration of the MVA-vectored vaccines.                                                                                                                                                                                                                                                                                                                                                                                                                                                                                          |

## 2 SYNOPSIS

| INFORMATION                    |                                                                                                                                                                                                                                                                                                                                                                                                                                                                                                                                                                                                                                                                                                                                                                                                                                                                                                                                                                                                                                                                                                                                                                                                                                                                                                                                                                                  |
|--------------------------------|----------------------------------------------------------------------------------------------------------------------------------------------------------------------------------------------------------------------------------------------------------------------------------------------------------------------------------------------------------------------------------------------------------------------------------------------------------------------------------------------------------------------------------------------------------------------------------------------------------------------------------------------------------------------------------------------------------------------------------------------------------------------------------------------------------------------------------------------------------------------------------------------------------------------------------------------------------------------------------------------------------------------------------------------------------------------------------------------------------------------------------------------------------------------------------------------------------------------------------------------------------------------------------------------------------------------------------------------------------------------------------|
| SYNOPSIS OF TRIAL HIV-CORE 006 |                                                                                                                                                                                                                                                                                                                                                                                                                                                                                                                                                                                                                                                                                                                                                                                                                                                                                                                                                                                                                                                                                                                                                                                                                                                                                                                                                                                  |
| <b>TITLE</b>                   | <b>HIV-CORE 006: A Phase 1 Trial of ChAdOx1- and MVA-vectored Conserved Mosaic HIV-1 Vaccines in Healthy, Adult HIV-negative Volunteers in Eastern and Southern Africa.</b>                                                                                                                                                                                                                                                                                                                                                                                                                                                                                                                                                                                                                                                                                                                                                                                                                                                                                                                                                                                                                                                                                                                                                                                                      |
| <b>PHASE</b>                   | Phase 1 first-in-human trial                                                                                                                                                                                                                                                                                                                                                                                                                                                                                                                                                                                                                                                                                                                                                                                                                                                                                                                                                                                                                                                                                                                                                                                                                                                                                                                                                     |
| <b>SPONSOR</b>                 | University of Oxford                                                                                                                                                                                                                                                                                                                                                                                                                                                                                                                                                                                                                                                                                                                                                                                                                                                                                                                                                                                                                                                                                                                                                                                                                                                                                                                                                             |
| <b>HYPOTHESIS</b>              | The mosaic immunogens delivered by a prime-boost regimen of non-replicating simian adenovirus followed by non-replicating poxvirus modified vaccinia virus Ankara (MVA) will induce CD8 <sup>+</sup> T cells, specific for conserved epitopes common to HIV-1 variants, efficient in controlling HIV-1 infection or helping prevent establishment of chronic infection.                                                                                                                                                                                                                                                                                                                                                                                                                                                                                                                                                                                                                                                                                                                                                                                                                                                                                                                                                                                                          |
| <b>OBJECTIVES</b>              | <p><b>PRIMARY</b></p> <p><b>Safety</b></p> <ul style="list-style-type: none"> <li>To evaluate the safety and tolerability of a prime boost vaccine regimen utilizing non-replicating simian adenovirus (ChAdOx1) followed by non-replicating poxvirus modified vaccinia virus Ankara (MVA) in adults in Eastern and Southern Africa</li> </ul> <p><b>Immunogenicity</b></p> <ul style="list-style-type: none"> <li>To evaluate the specific T-cell immune responses induced by the ChAdOx1.tHIVconsv1 followed by MVA.tHIVconsv3&amp;4 vaccines in vaccine recipients.</li> </ul> <p><b>SECONDARY</b></p> <ul style="list-style-type: none"> <li>To assess tHIVconsvX-specific T-cell responses of for their frequency, breadth and duration in vaccine recipients.</li> <li>To assess functional T-cell responses in vaccine recipients that inhibit replication in vitro of viruses of major HIV-1 clades A, B, C and D.</li> </ul> <p><b>EXPLORATORY</b></p> <ul style="list-style-type: none"> <li>To assess induction of plurifunctional tHIVconsvX-specific memory T cells in the vaccine recipients.</li> <li>Characterization of the gut microbiome composition and richness.</li> <li>Feasibility of recruiting required sample size across all sites within 16 weeks</li> <li>Feasibility of retaining at least 90% of enrolled volunteers to end of study.</li> </ul> |
| <b>ENDPOINTS</b>               | <p><b>PRIMARY</b></p> <p><b>Safety</b></p> <ul style="list-style-type: none"> <li>Proportion of volunteers with local and systemic reactogenicity events from Day 0 to Day 7 post vaccination</li> <li>Proportion of volunteers with Grade 3 or 4 unsolicited adverse events through 28 days post final vaccination</li> <li>Proportion of volunteers with vaccine related serious adverse events (SAEs) collected throughout the study period</li> </ul> <p><b>Immunogenicity</b></p> <ul style="list-style-type: none"> <li>Proportion of vaccine recipients developing HIV-1-specific T-cell responses</li> </ul> <p><b>SECONDARY</b></p> <ul style="list-style-type: none"> <li>Frequency, breadth and duration of T-cell responses to conserved epitopes measured in IFN-<math>\gamma</math> ELISPOT assay in each vaccine recipient</li> </ul>                                                                                                                                                                                                                                                                                                                                                                                                                                                                                                                             |

|                                                               | <ul style="list-style-type: none"><li>Breadth of inhibition of HIV-1 viruses representative of circulating viruses in Kenya, Uganda and Zambia and other global clades in the <i>in vitro</i> Virus Inhibition Assay</li></ul> <p><b>EXPLORATORY</b></p> <ul style="list-style-type: none"><li>Proportions of mono-, bi- and tri-functional T cells in the vaccine recipients</li><li>Shotgun sequencing and metabolomic analyses.</li><li>Proportion of target number of volunteers enrolled within 16 weeks</li><li>Proportion of enrolled volunteers that are retained in the study through the final study visit.</li></ul>                                                                                                                                                                                                                                                                                                                                                                       |         |         |      |      |   |    |    |      |   |    |         |         |       |    |  |  |
|---------------------------------------------------------------|-------------------------------------------------------------------------------------------------------------------------------------------------------------------------------------------------------------------------------------------------------------------------------------------------------------------------------------------------------------------------------------------------------------------------------------------------------------------------------------------------------------------------------------------------------------------------------------------------------------------------------------------------------------------------------------------------------------------------------------------------------------------------------------------------------------------------------------------------------------------------------------------------------------------------------------------------------------------------------------------------------|---------|---------|------|------|---|----|----|------|---|----|---------|---------|-------|----|--|--|
| STUDY DESIGN                                                  | <table><tr><th>Arms</th><th>N</th><th>Wk 0</th><th>Wk 4</th></tr><tr><td>1</td><td>72</td><td>C1</td><td>M3M4</td></tr><tr><td>2</td><td>16</td><td>Placebo</td><td>Placebo</td></tr><tr><td>Total</td><td>88</td><td></td><td></td></tr></table> <p>C1; ChAdOx1.tHIVconsrv1<br/>M3; MVA.tHIVconsrv3<br/>M4; MVA.tHIVconsrv4</p> <ul style="list-style-type: none"><li>All vaccinations will be given intramuscularly (IM), in the deltoid muscle of each arm.</li><li>Follow up will occur for 48 weeks following enrolment (C1 vaccination).</li><li>Unblinded study pharmacist(s) staff at each site will be responsible for investigational medicinal product preparation and accountability. All other site staff and all trial volunteers will be blinded to treatment assignment (i.e., active versus placebo).</li></ul> <p><b>Clinical Sites:</b> Volunteers will be enrolled at 4 Clinical Research Centres in Kenya, Uganda, and Zambia, and randomised to receive vaccine or placebo.</p> | Arms    | N       | Wk 0 | Wk 4 | 1 | 72 | C1 | M3M4 | 2 | 16 | Placebo | Placebo | Total | 88 |  |  |
| Arms                                                          | N                                                                                                                                                                                                                                                                                                                                                                                                                                                                                                                                                                                                                                                                                                                                                                                                                                                                                                                                                                                                     | Wk 0    | Wk 4    |      |      |   |    |    |      |   |    |         |         |       |    |  |  |
| 1                                                             | 72                                                                                                                                                                                                                                                                                                                                                                                                                                                                                                                                                                                                                                                                                                                                                                                                                                                                                                                                                                                                    | C1      | M3M4    |      |      |   |    |    |      |   |    |         |         |       |    |  |  |
| 2                                                             | 16                                                                                                                                                                                                                                                                                                                                                                                                                                                                                                                                                                                                                                                                                                                                                                                                                                                                                                                                                                                                    | Placebo | Placebo |      |      |   |    |    |      |   |    |         |         |       |    |  |  |
| Total                                                         | 88                                                                                                                                                                                                                                                                                                                                                                                                                                                                                                                                                                                                                                                                                                                                                                                                                                                                                                                                                                                                    |         |         |      |      |   |    |    |      |   |    |         |         |       |    |  |  |
| STUDY POPULATION                                              | <p>Volunteers will include healthy HIV-uninfected male or female adults aged 18-50 years, who are at low risk of HIV infection, who are available for the duration of the trial, willing to undergo HIV testing, willing to use an effective method of contraception, and in the opinion of the principal investigator or designee, understand the study and provide written informed consent.</p> <p>Principal exclusion criteria include confirmed HIV-1 or HIV-2 infection; pregnancy and lactation; significant acute or chronic disease; clinically significant laboratory abnormalities, recent vaccination or receipt of a blood product, previous receipt of an HIV vaccine; and history of severe local or systemic reactions to vaccination.</p>                                                                                                                                                                                                                                            |         |         |      |      |   |    |    |      |   |    |         |         |       |    |  |  |
| DATA MONITORING AND ETHICS COMMITTEE (DMEC) AND PAUSING RULES | <p>The DMEC will review data from the first 10 volunteers at 2 weeks after vaccination with the prime (C1) and again at 2 weeks after the boost (M3M4).</p> <p><b>PAUSING RULES</b></p> <p>Enrollment will be paused if one or more volunteers experiences a Serious Adverse Event that is judged possibly, probably or definitely related to the IMP, if there is a volunteer death, if two or more volunteers experience grade 3 adverse events in the same System Organ Class that are considered to be at least possibly related to IMP, or if there is a grade 4 adverse event that is considered to be possibly, probably, or definitely related to IMP. The study will continue enrollment and vaccinations only after evaluation of relevant safety data by the DMEC.</p>                                                                                                                                                                                                                     |         |         |      |      |   |    |    |      |   |    |         |         |       |    |  |  |

| DESCRIPTION OF INVESTIGATIONAL MEDICINAL PRODUCT | <ul style="list-style-type: none"><li>• 5.0 x 10<sup>10</sup> vp of ChAdOx1.tHIVconsv1 (C1) administered IM</li><li>• 1.0 x 10<sup>8</sup> PFU of MVA.tHIVconsv3 (M3) administered IM</li><li>• 0.9 x 10<sup>8</sup> PFU of MVA.tHIVconsv4 (M4) administered IM</li><li>• Normal sterile saline administered IM as Placebo</li></ul>                                                                                                                                                                                                                                                                                                                                                                                                                                                                                                                                                                                                                                                                                                                                                                                                                                                                                                                                                                                                                                                                                                                                                                                                                                                                                                                                                                                                                                                                                                                                                                                                                                                                                                                                                                                                                                                                                                                                                                                                                                                                                                                                                                                                                               |                                 |                                 |   |            |   |             |   |            |   |            |   |             |   |             |                          |                    |  |          |           |       |      |      |       |      |      |       |      |      |       |       |      |       |        |       |       |        |        |       |        |        |       |        |        |
|--------------------------------------------------|--------------------------------------------------------------------------------------------------------------------------------------------------------------------------------------------------------------------------------------------------------------------------------------------------------------------------------------------------------------------------------------------------------------------------------------------------------------------------------------------------------------------------------------------------------------------------------------------------------------------------------------------------------------------------------------------------------------------------------------------------------------------------------------------------------------------------------------------------------------------------------------------------------------------------------------------------------------------------------------------------------------------------------------------------------------------------------------------------------------------------------------------------------------------------------------------------------------------------------------------------------------------------------------------------------------------------------------------------------------------------------------------------------------------------------------------------------------------------------------------------------------------------------------------------------------------------------------------------------------------------------------------------------------------------------------------------------------------------------------------------------------------------------------------------------------------------------------------------------------------------------------------------------------------------------------------------------------------------------------------------------------------------------------------------------------------------------------------------------------------------------------------------------------------------------------------------------------------------------------------------------------------------------------------------------------------------------------------------------------------------------------------------------------------------------------------------------------------------------------------------------------------------------------------------------------------|---------------------------------|---------------------------------|---|------------|---|-------------|---|------------|---|------------|---|-------------|---|-------------|--------------------------|--------------------|--|----------|-----------|-------|------|------|-------|------|------|-------|------|------|-------|-------|------|-------|--------|-------|-------|--------|--------|-------|--------|--------|-------|--------|--------|
| DURATION OF STUDY PARTICIPATION                  | Volunteers will be screened up to 28 days before the first vaccination and will be followed for 48 weeks after the first vaccine is administered. Total study duration for any individual volunteer will be approximately 52 weeks (4 weeks in the screening period and 48 weeks in the follow-up phase).                                                                                                                                                                                                                                                                                                                                                                                                                                                                                                                                                                                                                                                                                                                                                                                                                                                                                                                                                                                                                                                                                                                                                                                                                                                                                                                                                                                                                                                                                                                                                                                                                                                                                                                                                                                                                                                                                                                                                                                                                                                                                                                                                                                                                                                          |                                 |                                 |   |            |   |             |   |            |   |            |   |             |   |             |                          |                    |  |          |           |       |      |      |       |      |      |       |      |      |       |       |      |       |        |       |       |        |        |       |        |        |       |        |        |
| STATISTICAL CONSIDERATIONS                       | <p><b>Safety</b> Clinical safety data will be recorded using electronic data entry to allow central review of the entire database. At the end of the study, a full analysis will be prepared according to a pre-specified statistical analysis plan.</p> <p>Tables 2 and 3 show the sample size calculations for safety, which are expressed in terms of the ability to detect related serious adverse events (SAE), i.e. the probabilities of observing 0 SAEs and 2+ (2 or more) related SAEs among a group of n=72 (any regimen) for a range of possible true event rates. For example, if none of the 72 volunteers receiving the vaccine experiences an SAE related to the vaccine, the 95% two-sided upper confidence bound for the rate of such reactions in a population exposed to the vaccines is 5%.</p> <div><div>Table 2. Confidence in observed number of related SAEs (n = 72)</div><table><tr><th>Observed number of related SAEs</th><th>95% Confidence Interval (exact)</th></tr><tr><td>0</td><td>0.0 – 5.0%</td></tr><tr><td>1</td><td>0.04 – 7.5%</td></tr><tr><td>2</td><td>0.3 – 9.7%</td></tr><tr><td>3</td><td>0.9– 11.7%</td></tr><tr><td>4</td><td>1.5 – 13.6%</td></tr><tr><td>5</td><td>2.3 – 15.5%</td></tr></table></div> <div><div>Table 3. Probability of observing 0 and 2+ related SAEs at a given SAE rate (n = 72)</div><table><tr><th rowspan="2">Event rate (related SAE)</th><th colspan="2">Any regimen (n=72)</th></tr><tr><th>0 events</th><th>2+ events</th></tr><tr><td>0.010</td><td>0.48</td><td>0.16</td></tr><tr><td>0.025</td><td>0.16</td><td>0.54</td></tr><tr><td>0.035</td><td>0.08</td><td>0.72</td></tr><tr><td>0.050</td><td>0.025</td><td>0.88</td></tr><tr><td>0.100</td><td>&lt;0.001</td><td>0.995</td></tr><tr><td>0.150</td><td>&lt;0.001</td><td>&gt;0.999</td></tr><tr><td>0.200</td><td>&lt;0.001</td><td>&gt;0.999</td></tr><tr><td>0.250</td><td>&lt;0.001</td><td>&gt;0.999</td></tr></table></div> <p><b>Immunogenicity</b> The primary immunogenicity endpoints are the frequency of vaccine responders.</p> <p>The secondary endpoint is the frequency and breadth of HIV-1- specific T-cell responses induced by the vaccine in each individual and the number of HIV-1 viruses inhibited in a panel of HIV-1 after completion of the vaccination regimen. Inhibition is defined as a post-vaccination log<sub>10</sub> reduction in HIV-1 production by CD4<sup>+</sup> cells by autologous CD8<sup>+</sup> effector cells of 1.5 or greater relative to pre-vaccination inhibition.</p> | Observed number of related SAEs | 95% Confidence Interval (exact) | 0 | 0.0 – 5.0% | 1 | 0.04 – 7.5% | 2 | 0.3 – 9.7% | 3 | 0.9– 11.7% | 4 | 1.5 – 13.6% | 5 | 2.3 – 15.5% | Event rate (related SAE) | Any regimen (n=72) |  | 0 events | 2+ events | 0.010 | 0.48 | 0.16 | 0.025 | 0.16 | 0.54 | 0.035 | 0.08 | 0.72 | 0.050 | 0.025 | 0.88 | 0.100 | <0.001 | 0.995 | 0.150 | <0.001 | >0.999 | 0.200 | <0.001 | >0.999 | 0.250 | <0.001 | >0.999 |
| Observed number of related SAEs                  | 95% Confidence Interval (exact)                                                                                                                                                                                                                                                                                                                                                                                                                                                                                                                                                                                                                                                                                                                                                                                                                                                                                                                                                                                                                                                                                                                                                                                                                                                                                                                                                                                                                                                                                                                                                                                                                                                                                                                                                                                                                                                                                                                                                                                                                                                                                                                                                                                                                                                                                                                                                                                                                                                                                                                                    |                                 |                                 |   |            |   |             |   |            |   |            |   |             |   |             |                          |                    |  |          |           |       |      |      |       |      |      |       |      |      |       |       |      |       |        |       |       |        |        |       |        |        |       |        |        |
| 0                                                | 0.0 – 5.0%                                                                                                                                                                                                                                                                                                                                                                                                                                                                                                                                                                                                                                                                                                                                                                                                                                                                                                                                                                                                                                                                                                                                                                                                                                                                                                                                                                                                                                                                                                                                                                                                                                                                                                                                                                                                                                                                                                                                                                                                                                                                                                                                                                                                                                                                                                                                                                                                                                                                                                                                                         |                                 |                                 |   |            |   |             |   |            |   |            |   |             |   |             |                          |                    |  |          |           |       |      |      |       |      |      |       |      |      |       |       |      |       |        |       |       |        |        |       |        |        |       |        |        |
| 1                                                | 0.04 – 7.5%                                                                                                                                                                                                                                                                                                                                                                                                                                                                                                                                                                                                                                                                                                                                                                                                                                                                                                                                                                                                                                                                                                                                                                                                                                                                                                                                                                                                                                                                                                                                                                                                                                                                                                                                                                                                                                                                                                                                                                                                                                                                                                                                                                                                                                                                                                                                                                                                                                                                                                                                                        |                                 |                                 |   |            |   |             |   |            |   |            |   |             |   |             |                          |                    |  |          |           |       |      |      |       |      |      |       |      |      |       |       |      |       |        |       |       |        |        |       |        |        |       |        |        |
| 2                                                | 0.3 – 9.7%                                                                                                                                                                                                                                                                                                                                                                                                                                                                                                                                                                                                                                                                                                                                                                                                                                                                                                                                                                                                                                                                                                                                                                                                                                                                                                                                                                                                                                                                                                                                                                                                                                                                                                                                                                                                                                                                                                                                                                                                                                                                                                                                                                                                                                                                                                                                                                                                                                                                                                                                                         |                                 |                                 |   |            |   |             |   |            |   |            |   |             |   |             |                          |                    |  |          |           |       |      |      |       |      |      |       |      |      |       |       |      |       |        |       |       |        |        |       |        |        |       |        |        |
| 3                                                | 0.9– 11.7%                                                                                                                                                                                                                                                                                                                                                                                                                                                                                                                                                                                                                                                                                                                                                                                                                                                                                                                                                                                                                                                                                                                                                                                                                                                                                                                                                                                                                                                                                                                                                                                                                                                                                                                                                                                                                                                                                                                                                                                                                                                                                                                                                                                                                                                                                                                                                                                                                                                                                                                                                         |                                 |                                 |   |            |   |             |   |            |   |            |   |             |   |             |                          |                    |  |          |           |       |      |      |       |      |      |       |      |      |       |       |      |       |        |       |       |        |        |       |        |        |       |        |        |
| 4                                                | 1.5 – 13.6%                                                                                                                                                                                                                                                                                                                                                                                                                                                                                                                                                                                                                                                                                                                                                                                                                                                                                                                                                                                                                                                                                                                                                                                                                                                                                                                                                                                                                                                                                                                                                                                                                                                                                                                                                                                                                                                                                                                                                                                                                                                                                                                                                                                                                                                                                                                                                                                                                                                                                                                                                        |                                 |                                 |   |            |   |             |   |            |   |            |   |             |   |             |                          |                    |  |          |           |       |      |      |       |      |      |       |      |      |       |       |      |       |        |       |       |        |        |       |        |        |       |        |        |
| 5                                                | 2.3 – 15.5%                                                                                                                                                                                                                                                                                                                                                                                                                                                                                                                                                                                                                                                                                                                                                                                                                                                                                                                                                                                                                                                                                                                                                                                                                                                                                                                                                                                                                                                                                                                                                                                                                                                                                                                                                                                                                                                                                                                                                                                                                                                                                                                                                                                                                                                                                                                                                                                                                                                                                                                                                        |                                 |                                 |   |            |   |             |   |            |   |            |   |             |   |             |                          |                    |  |          |           |       |      |      |       |      |      |       |      |      |       |       |      |       |        |       |       |        |        |       |        |        |       |        |        |
| Event rate (related SAE)                         | Any regimen (n=72)                                                                                                                                                                                                                                                                                                                                                                                                                                                                                                                                                                                                                                                                                                                                                                                                                                                                                                                                                                                                                                                                                                                                                                                                                                                                                                                                                                                                                                                                                                                                                                                                                                                                                                                                                                                                                                                                                                                                                                                                                                                                                                                                                                                                                                                                                                                                                                                                                                                                                                                                                 |                                 |                                 |   |            |   |             |   |            |   |            |   |             |   |             |                          |                    |  |          |           |       |      |      |       |      |      |       |      |      |       |       |      |       |        |       |       |        |        |       |        |        |       |        |        |
|                                                  | 0 events                                                                                                                                                                                                                                                                                                                                                                                                                                                                                                                                                                                                                                                                                                                                                                                                                                                                                                                                                                                                                                                                                                                                                                                                                                                                                                                                                                                                                                                                                                                                                                                                                                                                                                                                                                                                                                                                                                                                                                                                                                                                                                                                                                                                                                                                                                                                                                                                                                                                                                                                                           | 2+ events                       |                                 |   |            |   |             |   |            |   |            |   |             |   |             |                          |                    |  |          |           |       |      |      |       |      |      |       |      |      |       |       |      |       |        |       |       |        |        |       |        |        |       |        |        |
| 0.010                                            | 0.48                                                                                                                                                                                                                                                                                                                                                                                                                                                                                                                                                                                                                                                                                                                                                                                                                                                                                                                                                                                                                                                                                                                                                                                                                                                                                                                                                                                                                                                                                                                                                                                                                                                                                                                                                                                                                                                                                                                                                                                                                                                                                                                                                                                                                                                                                                                                                                                                                                                                                                                                                               | 0.16                            |                                 |   |            |   |             |   |            |   |            |   |             |   |             |                          |                    |  |          |           |       |      |      |       |      |      |       |      |      |       |       |      |       |        |       |       |        |        |       |        |        |       |        |        |
| 0.025                                            | 0.16                                                                                                                                                                                                                                                                                                                                                                                                                                                                                                                                                                                                                                                                                                                                                                                                                                                                                                                                                                                                                                                                                                                                                                                                                                                                                                                                                                                                                                                                                                                                                                                                                                                                                                                                                                                                                                                                                                                                                                                                                                                                                                                                                                                                                                                                                                                                                                                                                                                                                                                                                               | 0.54                            |                                 |   |            |   |             |   |            |   |            |   |             |   |             |                          |                    |  |          |           |       |      |      |       |      |      |       |      |      |       |       |      |       |        |       |       |        |        |       |        |        |       |        |        |
| 0.035                                            | 0.08                                                                                                                                                                                                                                                                                                                                                                                                                                                                                                                                                                                                                                                                                                                                                                                                                                                                                                                                                                                                                                                                                                                                                                                                                                                                                                                                                                                                                                                                                                                                                                                                                                                                                                                                                                                                                                                                                                                                                                                                                                                                                                                                                                                                                                                                                                                                                                                                                                                                                                                                                               | 0.72                            |                                 |   |            |   |             |   |            |   |            |   |             |   |             |                          |                    |  |          |           |       |      |      |       |      |      |       |      |      |       |       |      |       |        |       |       |        |        |       |        |        |       |        |        |
| 0.050                                            | 0.025                                                                                                                                                                                                                                                                                                                                                                                                                                                                                                                                                                                                                                                                                                                                                                                                                                                                                                                                                                                                                                                                                                                                                                                                                                                                                                                                                                                                                                                                                                                                                                                                                                                                                                                                                                                                                                                                                                                                                                                                                                                                                                                                                                                                                                                                                                                                                                                                                                                                                                                                                              | 0.88                            |                                 |   |            |   |             |   |            |   |            |   |             |   |             |                          |                    |  |          |           |       |      |      |       |      |      |       |      |      |       |       |      |       |        |       |       |        |        |       |        |        |       |        |        |
| 0.100                                            | <0.001                                                                                                                                                                                                                                                                                                                                                                                                                                                                                                                                                                                                                                                                                                                                                                                                                                                                                                                                                                                                                                                                                                                                                                                                                                                                                                                                                                                                                                                                                                                                                                                                                                                                                                                                                                                                                                                                                                                                                                                                                                                                                                                                                                                                                                                                                                                                                                                                                                                                                                                                                             | 0.995                           |                                 |   |            |   |             |   |            |   |            |   |             |   |             |                          |                    |  |          |           |       |      |      |       |      |      |       |      |      |       |       |      |       |        |       |       |        |        |       |        |        |       |        |        |
| 0.150                                            | <0.001                                                                                                                                                                                                                                                                                                                                                                                                                                                                                                                                                                                                                                                                                                                                                                                                                                                                                                                                                                                                                                                                                                                                                                                                                                                                                                                                                                                                                                                                                                                                                                                                                                                                                                                                                                                                                                                                                                                                                                                                                                                                                                                                                                                                                                                                                                                                                                                                                                                                                                                                                             | >0.999                          |                                 |   |            |   |             |   |            |   |            |   |             |   |             |                          |                    |  |          |           |       |      |      |       |      |      |       |      |      |       |       |      |       |        |       |       |        |        |       |        |        |       |        |        |
| 0.200                                            | <0.001                                                                                                                                                                                                                                                                                                                                                                                                                                                                                                                                                                                                                                                                                                                                                                                                                                                                                                                                                                                                                                                                                                                                                                                                                                                                                                                                                                                                                                                                                                                                                                                                                                                                                                                                                                                                                                                                                                                                                                                                                                                                                                                                                                                                                                                                                                                                                                                                                                                                                                                                                             | >0.999                          |                                 |   |            |   |             |   |            |   |            |   |             |   |             |                          |                    |  |          |           |       |      |      |       |      |      |       |      |      |       |       |      |       |        |       |       |        |        |       |        |        |       |        |        |
| 0.250                                            | <0.001                                                                                                                                                                                                                                                                                                                                                                                                                                                                                                                                                                                                                                                                                                                                                                                                                                                                                                                                                                                                                                                                                                                                                                                                                                                                                                                                                                                                                                                                                                                                                                                                                                                                                                                                                                                                                                                                                                                                                                                                                                                                                                                                                                                                                                                                                                                                                                                                                                                                                                                                                             | >0.999                          |                                 |   |            |   |             |   |            |   |            |   |             |   |             |                          |                    |  |          |           |       |      |      |       |      |      |       |      |      |       |       |      |       |        |       |       |        |        |       |        |        |       |        |        |

## ABBREVIATIONS

|        |                                                     |
|--------|-----------------------------------------------------|
| AE     | Adverse event                                       |
| AR     | Adverse reaction                                    |
| CI     | Chief Investigator                                  |
| CRA    | Clinical Research Associate (Study Monitor)         |
| CRC    | Clinical Research Centre                            |
| CRF    | Case Report Form                                    |
| CT     | Clinical Trials                                     |
| CTA    | Clinical Trials Agreement                           |
| CTRG   | Clinical Trials and Research Governance             |
| DCC    | Data Coordinating Centre                            |
| DMEC   | Data Monitoring and Ethics Committee                |
| DSUR   | Development Safety Update Report                    |
| GCP    | Good Clinical Practice                              |
| IB     | Investigator's Brochure                             |
| ICF    | Informed Consent Form                               |
| ICH    | International Conference on Harmonisation           |
| IEC    | Independent Ethics Committee                        |
| IRB    | Institutional Review Board                          |
| IMP    | Investigational Medicinal Product                   |
| MHRA   | Medicines and Healthcare products Regulatory Agency |
| MVA    | Modified Vaccinia Ankara                            |
| OXTREC | Oxford Tropical Research Ethics Committee           |
| PI     | Principal Investigator                              |
| PIS    | Participant Information Sheet                       |
| REC    | Research Ethics Committee                           |
| SAE    | Serious Adverse Event                               |
| SAR    | Serious Adverse Reaction                            |
| SDV    | Source Data Verification                            |
| SMPC   | Summary of Medicinal Product Characteristics        |
| SOP    | Standard Operating Procedure                        |
| SUSAR  | Suspected Unexpected Serious Adverse Reactions      |
| TMF    | Trial Master File                                   |
| VISP   | Vaccine-Induced Seropositivity                      |



### 3 BACKGROUND AND RATIONALE

#### 3.1. Urgent need for a vaccine against HIV infection/AIDS

Control of the HIV epidemic remains one of the global health priorities. Despite remarkable progress achieved in decreasing HIV transmission and AIDS-related deaths in the last decade due to development of over 30 antiretroviral drugs, HIV continues to spread, infecting approximately 1.8 million people in 2016(1). Around a third of people who are HIV positive do not know their status and hence do not receive treatment(1). For those who know their status: antiretroviral drugs may not be available on a regular reliable basis in many resource-poor settings(2). In addition to that, they have long-term side effects, their effective use requires rigorous daily compliance(3) and the circulating and/or transmitted viruses have been shown to develop resistance to several antiretroviral drugs. Also, there is unwillingness to take drugs in a surprisingly large proportion of infected individuals, even in the USA(4). Thus, a safe, effective, prophylactic HIV vaccine remains one of the priorities of HIV/AIDS research, and will be key to any strategy for halting the AIDS epidemic.

Phase 1 clinical trial HIV-CORE (Conserved Regions) 006 is a trial of a new combined vaccine regimen to determine safety and immunogenicity in healthy adults in Kenya, Uganda and Zambia. Immune responses may vary between populations and so it is important to confirm that the vaccines are suitable for the people and environment where they will be deployed for protection against HIV/AIDS. There are many different strains of HIV-1, and the virus can change to escape immune responses. This vaccine regimen is designed to work in all parts of the world.

Our aim is to induce effective cytotoxic T lymphocytes (CTL) against HIV-1. These could complement broadly neutralizing antibodies in prophylaxis and play a central role in cure. CTL exert their effector functions by killing HIV-1-infected cells and producing soluble factors, which directly or indirectly counteract the HIV-1 replicative cycle. In future, this approach could be combined, in human efficacy testing, with other immunogens that stimulate humoral responses, with the goal of effectively preventing HIV-1 infections.

The central principle of our strategy is to focus T-cell immune responses on the most conserved regions of the HIV-1 proteome. These regions are common to most variants and, if mutated, reduce the ability of the virus to grow(5); these regions are the “Achilles heel” of HIV-1. Targeting of conserved regions is further enhanced by using ‘mosaic’ proteins, which are designed by computer to maximize the match of the vaccine with global HIV-1 variants and to block common ways the HIV-1 changes to escape the immune response. Vaccines should match circulating HIV-1 variants as much as possible to stop them efficiently. When T cells attack conserved parts of HIV-1 proteins (parts that seldom or never change), the disease is better controlled—this vaccine includes those parts. The HIV-1-derived mosaic genes are called tHIVconsvX and are delivered by two safe, non-replicating vaccine vectors derived from chimpanzee adenovirus and poxvirus modified vaccinia virus Ankara (MVA). Adenoviruses, if able to grow, normally cause respiratory and gastrointestinal ailments, while the unmodified chimpanzee adenovirus is not known to cause disease in humans; the engineered vaccine vector called ChAdOx1 is crippled so it cannot grow. ChAdOx1 and similar experimental vaccines have been shown to be safe in over 1,500 human volunteers(6–8). MVA is a poxvirus, which does not replicate in humans. It was used safely as the smallpox vaccine in over 120,000 people at the end of the smallpox-eradication campaign and as an experimental vaccine vector against a variety of diseases in many clinical trials(9).

Humans and microbiota, which consist of bacteria, fungi, viruses and eukaryotic species, have co-evolved over millions of years and their coexistence is beneficial to both parties. Human immune system is constitutively exposed to microbial stimulation and any vaccine design and responsiveness needs to be considered in the context of host-microbiota interactions. Manipulation of the microbiota functions and composition through diet, engraftment and/or any other means may thus become a viable strategy for improving vaccine responsiveness as well as treating malfunctions of the immune system (10). The first reports on the influence of gut microbiota diversity and composition on responses to vaccination have

been emerging for some time (11–15). As part of the exploratory endpoints for this trial, we shall characterize the gut microbiome of study volunteers for composition and richness before and after administration of the study vaccines.

The ChAdOx1-vectored HIV-1 vaccine in this trial will be tested for the first time in humans, and MVA.tHIVconsv3 and MVA.tHIVconsv4 are currently administered to HIV-positive individuals in the first-in-human clinical trial in the USA (NCT03844386). However, this is the first time these C1-M3M4 vaccines will be administered to humans sequentially. In parallel with HIV-CORE 006, these vaccines will be tested for safety in the United Kingdom, in a phase I trial HIV-CORE 0052. The tHIVconsvX vaccines have been designed for global use irrespective of the HIV-1 strain and are therefore very suitable for Africa, where multiple strains are responsible for the epidemic, mainly from the HIV-1 families A, D and C. The HIV-CORE 006 trial will take place at four sites in Africa and will enroll healthy adults between 18 and 50 years of age. We do not yet know whether the vaccine will have a beneficial effect, no effect, or whether it could cause harm. The health of trial volunteers will be monitored carefully, and volunteers will receive counselling and support to minimize HIV-1 infection. Prior to the trial, consultations with policy makers, healthcare service providers and community leaders will take place to understand and address the obstacles and unmet demand for HIV services and healthcare services and to determine the appropriate level of baseline HIV-1-preventive services.

### **3.2. Investigational medicinal products**

#### **3.2.1. The investigational ChAdOx1.tHIVconsv1 vaccine**

The ChAdOx1.tHIVconsv1 vaccine utilizes non-replicating engineered simian adenovirus vaccine vector ChAdOx1 derived from simian adenovirus (SAdV) serotype Y25 of chimpanzee origin to deliver a mosaic immunogen tHIVconsv1 derived from functionally conserved regions of HIV-1 proteins.

*Rationale for using the ChAdOx1 vaccine vector.* Selected types of attenuated adenovirus are very promising as highly immunogenic vaccine vectors(16, 17). A drawback for the use of the leading human adenovirus serotype 5 (HAdV-5) is pre-existing immunity, mainly neutralizing antibodies, found commonly in humans particularly in Africa(16–18). To circumvent this problem, a number of SAdV serotypes have been explored, which are unaffected by human pre-existing antibodies and display promising T-cell immunogenicity. The genomic DNA of these adenoviruses was cloned into bacterial plasmids, to eliminate any possibility of carrying over adventitious infectious agents from the original hosts. These viruses were rendered replication-incompetent by deletion of the E1 genomic region, their immunogenicity was increased by deletion of the E3 region and their genomes can stably accommodate passenger gene(s). HEK293 cells were used for preparation of high titre GMP virus stocks without the risk of generating contaminating replication-competent adenovirus (RCA) forms. For the 1<sup>st</sup> generation vaccines, we chose as the attenuated SAdV-derived vaccine vector ChAdV-63. In 2013, GSK acquired Okairos and the ChAdV-63 platform and withdrew further access to this vector. Hence, we switched to UOXF fully-owned ChAdOx1. Similarly to ChAdV-63, the vaccine vector ChAdOx1 is derived from E-group simian adenovirus, this time from serotype Y25 (19), which is at least equally safe and immunogenic to ChAdV-63 in mice (20) non-human primates and humans (21).

*Rationale for the tHIVconsvX immunogens.* The conserved HIV-1 regions of the 2<sup>nd</sup> generation vaccines used here are in total 872 amino acids (aa) in length and contain only 6 segments of the HIV-1 genome. The global-HIV-1-protein alignments curated by Los Alamos National Laboratory–HIV Sequence Database (LANL-HSD) circa September 2013, were used as the baseline data to define conserved regions. These alignments included only one sequence per individual, and only sequences spanning full-length proteins. Co-optimized, complementary pairs of two mosaic proteins (mosaic 1 and mosaic 2, which differ in 10% aa) were designed (22), spanning each HIV-1 protein. Conservation was defined by the capacity of the two mosaic proteins to have at least an 9/9-aa match to 80% of the potential 9-aa T-cell epitope (PTE) variants found among the diverse HIV-1 strains in the LANL-HSD alignments. The 80% match to group M HIV-1 isolates cutoff translated into a design of 6 segments from 29 to 333 aa long. Next, both beneficial and

detrimental epitopes as defined by Mothe *et al.*(23) were overlaid on vaccine-epitope-coverage maps for the final selection of regions for the 2<sup>nd</sup> generation conserved vaccine based on all criteria above, and the only regions included were *both* conserved and enriched for beneficial epitopes. Thus, the 2<sup>nd</sup> generation vaccine contained 33 of the 48 beneficial epitopes defined by Mothe *et al.*(23) (69%) - the missing 15 beneficial epitopes were in variable regions in p17 and Vif (not included). Env was deliberately excluded because of high variability and absence of beneficial epitopes. Based on the LANL epitope database, as of June 2015, 752 distinct CD8 T-cell epitopes restricted by 84 different HLA class I presenting molecules were contained in the six regions. While these numbers, based on the database summary of the literature, emphasize the rich immunogenic potential of the conserved regions we selected, we fully expect these regions will contain many as yet unknown epitopes(24). Finally, to avoid boosting with the same irrelevant cross-junctional epitopes, the six regions were arranged in different orders in six tHIVconsvX genes, of which tHIVconsv1, tHIVconsv3 and tHIVconsv5 coded for mosaic 1 and tHIVconsv2, tHIVconsv4 and tHIVconsv6 coded for mosaic 2. Strong correlations of total tHIVconsvX-specific response magnitude and breadth with low viral load and high CD4 T-cell count were found in HIV-1-positive treatment naïve population in Japan.

**Product Description:** The ChAdOx1.tHIVconsv1 vaccine product will be supplied in sterile rubber-stopped glass vials. It will be presented as a slightly opaque solution, which will contain  $>1.1 \times 10^{11}$  vp/ml of ChAdOx1.tHIVconsv1 with a total volume of 650 µl, of which 500 µl will be administered. The product will be stored frozen below -65 °C.

### **3.2.2. The investigational MVA.tHIVconsv3 and MVA.tHIVconsv4 vaccine components**

Two vaccine components MVA.tHIVconsv3 and MVA.tHIVconsv4 complement each other and will be used as a pair for immunizations. They utilize non-replicating poxvirus MVA delivering bi-valent mosaic immunogens, either tHIVconsv3 or tHIVconsv4, derived from functionally conserved regions of HIV-1 proteins.

**Rationale for using MVA as a vaccine vector:** Modified vaccinia virus Ankara (MVA) is a vaccinia virus strain, which was attenuated by serial passage in chick embryo fibroblasts (CEF). It has lost 15% of the parental genome, including cytokine receptor genes. It replicates well in CEF and baby hamster cells but poorly in most mammalian cells (25, 26). MVA was used as a smallpox vaccine in the early 1970s towards the end of the eradication campaign in 120,000 people, without any serious adverse events reported, and is now licensed in the US for use in mass vaccination campaigns (Acambis 2000). Its safety in humans is therefore well established. MVA has been shown to be an effective vaccine vector and induce potent CD8<sup>+</sup> T-cell responses to passenger proteins. The immunogenicity of recombinant MVAs has been attributed in part to loss of several cytokine and chemokine receptor genes (27).

The safety and immunogenicity of a range of MVA-vectored vaccine candidates have been demonstrated in the BALB/c and SCID mice and in healthy and SIV-infected rhesus macaques, in GLP toxicology study UNO 0011 and in numerous preclinical studies (28–30). Similarly, the safety and immunogenicity of a range of MVA-vectored vaccine candidates for HIV-1 and other indications have been demonstrated in a number of clinical studies, in both healthy volunteers and HIV-1-infected volunteers (31–37).

**Rationale for design of the tHIVconsvX immunogens:** Please see above.

**Product description** MVA.tHIVconsv3 and MVA.tHIVconsv4 vaccine products will be supplied in separate sterile rubber-stopped glass vials. They will be presented as white cloudy solutions, formulated in Tris-HCl saline buffer (10 mM Tris-HCl, 140 mM NaCl, pH 7.7) at a concentration of  $3.4 \times 10^8$  pfu/ml for MVA.tHIVconsv3 and  $1.8 \times 10^8$  pfu/ml for MVA.tHIVconsv4, and an extractable volume of 500 µl for both. The products will be stored frozen below -65 °C.

### **3.3. A summary of findings from non-clinical studies and from other clinical trials**

Testing of the 2<sup>nd</sup> generation conserved region mosaic vaccines is supported by clinical studies of the 1<sup>st</sup> generation conserved region vaccines, and studies of the 2<sup>nd</sup> generation regions in treatment naïve patients and animal models.

Thus, the 1<sup>st</sup> generation immunogen HIVconsv used 14 regions designed as clade alternating amino acid consensus (equivalent to a monovalent mosaic) (38). Vaccines ChAdV63.HIVconsv-MVA.HIVconsv tested in 8 clinical trials, showed promising immunogenicity (31–37) by producing a signal for viremic control in HIV-infected volunteers that were given early ART and 29% patients controlled viremia during monitored ART pause beyond the typical 4 weeks (spontaneous control occurs in 10%-15% patients) (36).

Studies in 200 treatment-naïve HIV-1-positive Japanese patients demonstrated a statistically significant correlation between the total magnitude as well as the breadth of the CD8 T-cell responses specific for the conserved regions targeted by the 2<sup>nd</sup> generation vaccines and low plasma virus load and high CD4 counts (20) (39). All four correlations remained significant for 147 patients who did not have the HLA-B52 and B67 alleles protective in the Japanese population, suggesting that our vaccines could be effective in the entire population rather than only those who have protective HLA class I alleles.

Preclinical studies demonstrated high immunogenicity of the 2<sup>nd</sup> generation vaccines in mice and also of SIV-derived equivalent immunogens delivered by the same ChAdOx1-MVA vectors in rhesus macaques.

### **3.4. Summary of the known and potential risks and benefits, if any, to human volunteers**

Risks of chimp adenovirus vaccination. This vaccine adenovirus is weakened so that it cannot multiply in humans. ChAdOx1 is being developed as a vaccine vector for a number of vaccine candidates such as chikungunya, MERS, influenza, tuberculosis, malaria, meningitis (Men B) and cancer. While the ChAdOx1 vectored HIV-1 vaccine in this trial will be tested for the first time in humans, previous vaccine candidates using this vector were found to be well tolerated. Trials with these vaccines revealed that the majority of local and systemic reactogenicity related to the use of this vector has been mild or moderate. Cases of severe (Grade 3) reactogenicity have been noted with doses of  $2.5 \times 10^{10}$  vp and  $5 \times 10^{10}$  vp and included local pain, fever, nausea, malaise, fatigue, headache, arthralgia and myalgia. Laboratory adverse events have also been noted, these were of mild severity including lymphopenia, leukopenia, neutropenia, and anemia.

The 1<sup>st</sup> generation mosaic vaccine ChadV63.HIVconsv was tested in volunteers in the United Kingdom, continental Europe and in Africa and was well-tolerated with a positive safety profile. The majority of local and systemic adverse reactions were of mild to moderate severity with severe (Grade 3) reactogenicity being noted with doses of  $5 \times 10^{10}$  vp including local pain, fever, arthralgia, headache, fatigue and malaise.

Other potential rare severe reactions. The ChAdOx1 part of the vaccine (the “viral vector” or “carrier”) is the same as has been used in a recently developed COVID-19 vaccine (ChAdOx1 nCoV-19 - commonly known as the Oxford/AstraZeneca vaccine/Vaxzevria or Covidshield). In March 2021, concerns were raised after observations pointed to rare blood clotting conditions that could be associated with the vaccine. These events were reviewed by the MHRA (Medicines and Healthcare products Regulatory Agency) and the EMA (European Medicines Agency). The reports were of a very rare type of blood clot in the brain, known as cerebral venous sinus thrombosis (CVST), and also of clots in some other organs together, with low levels of platelets (thrombocytopenia). Up to and including 31 March 2021 there have been 79 UK reports of these blood clots and unfortunately 19 people died. Additional reports were submitted to the EMA from across the European Union. By 31 March 2021, 20.2 million doses of the ChAdOx1 nCoV-19 vaccine had been given in the UK.

After investigation, the UK MHRA concluded, based on the data currently available to them, they could not say that there was a definite link between the vaccine and the rare clotting events. The European

Medicines Agency concluded that unusual blood clots with low blood platelets should be listed as very rare side effects of the ChadOx1 nCov-19 vaccine.

Both agencies concluded that there wasn't enough evidence at present to say what the risk factors (e.g. age, gender, or other medical conditions) might be for having one of these rare clotting problems.

It is not known whether these rare clotting problems might be related to the vaccine vector virus (ChAdOx1), or to the SARS-CoV-2 part of the vaccine, the spike protein (the insert). The ChAdOx1 vector has been used in other clinical trials since 2012 (influenza, tuberculosis, prostate cancer, malaria, meningitis B, chikungunya, Zika and HIV vaccine trials). These rare blood clotting problems have not been seen in participants in these trials, however the number of people in these trials has been relatively small. These events remain extremely rare (in the UK it is estimated to affect 4 in a million people who receive a vaccine dose), and all medical regulators are collecting and analysing further data on them.

**Risks of poxvirus MVA vaccination.** The MVA vector was used as a smallpox vaccine about 40 years ago in over 120,000 people, without any reported serious adverse events during the vaccination campaign. Currently, MVA is being developed as a vaccine vector for a number of diseases such as HIV, malaria, tuberculosis, hepatitis, influenza and cancer. While the two MVA vaccines in this trial will be tested for the first time with ChAdOx1.tHIVconsv1 in humans. M&M Clinical Trial (NCT03844386) is the first-in-human clinical trial using MVA.tHIVconsv3 and MVA.tHIVconsv4. This is a double blind, randomized, placebo-controlled, parallel design, study in which 24 HIV-infected participants with durable viral suppression will be randomly assigned to receive vaccination with MVA.tHIVconsv3 (M3), MVA.tHIVconsv4 (M4), M3+M4 combined, or placebo. To date, 5 individuals were enrolled; no SAEs were recorded. Two other HIV vaccines developed by the same team in the University of Oxford, namely MVA.HIVA and the 1<sup>st</sup> generation conserved-region MVA.HIVconsv vaccines were tested in 370 and 188 healthy people, respectively. These vaccines were found to be safe and did not cause any significant or serious side effects in HIV-1 positive vaccinees on ART and HIV-negative vaccinees in the United Kingdom, continental Europe and Africa.

For the reasons given above, we do not expect to see any serious adverse reactions to the vaccines given in this study. Although no serious side effects were observed in experimental animals receiving these vaccines, it is possible that vaccines may produce unexpected and new side effects in some humans.

Any vaccination has the potential to cause a temporary soreness around the injection site; redness, pain, swelling, itching, bruising, a warm feeling; flu-like symptoms such as fever, chills, muscle aches and pains, headaches, nausea, dizziness and fatigue.

With any vaccination, there is a risk of rare serious adverse events, like an allergic reaction, characterized by rash, low blood pressure, sudden body swelling or serious breathing difficulty. Severe reactions in the nervous system are also extremely rare following vaccination and can cause Guillain-Barré syndrome (GBS). However, neither wild-type human adenoviruses nor vaccinia infections are associated with an increased risk of GBS, therefore, the possibility of this occurring as a result of vaccination with replication-defective viral vectors is extremely remote.

**Vaccine-Induced Seropositivity (VISP).** Administration of HIV vaccine candidates may cause some HIV-1 tests to give false positive results. Previous experience with the mosaic vaccines in mice has not demonstrated their ability to produce antibodies that could be detected by diagnostic antibody tests.

If VISP occurs, different testing methods will be used that will be able to distinguish true HIV infection from a false result due to vaccination.

### **3.5. Route of administration, dosage, dosage regimen and vaccination period**

The vaccines will be administered into the deltoid region of each arm. The total doses employed as well as the heterologous-prime-boost chimp adenovirus-MVA regimen have been tested and optimized for these types of vaccine vectors in many human volunteers for HIV-1 and other disease candidate vaccines. The volunteers will receive two doses of vaccines; at enrolment, then at 4 weeks. The 4-week gap is tested to assess an accelerated immunization protocol, which would be advantageous in a subsequent proof-of-concept phase 2b efficacy trial. The 4-week interval was shown to be equivalent to the 8-week interval in the HIV-CORE 003 trial and studies with Ebola vaccines (AVS Hill, UOXF; personal communication). Volunteers will be followed for 48 weeks from enrolment at week 0.

### **3.6. Study population**

The purpose of this trial is to determine whether the vaccination regimen is safe, tolerable and immunogenic. The vaccine immunogens tHIVconsvX were designed for maximum match with group M HIV-1 covering isolates from US/Europe and Africa. Previous studies have shown differences in African populations with respect to immune responses (40). This study will test the specificity, magnitude and functionality of T-cell responses after a regimen of one dose of ChAdOx1.tHIVconsv1 prime followed by MVA.tHIVconsv3 and MVA.tHIVconsv4 as a boost.

Enrollment for the HIV-CORE 006 trial will take place at four Clinical Research Centres (CRCs) in Eastern and Southern Africa. The target study population will include women and men at low risk of HIV infection.

## 4 OBJECTIVES AND OUTCOME MEASURES

| Objectives                                                                                                                                                                                                                                                                                                                                                                                                                                                                               | Endpoints/Outcome Measures                                                                                                                                                                                                                                                                                                                                                                          | Timepoint(s) of evaluation of this outcome measure (if applicable)                                                                                                                                                      |
|------------------------------------------------------------------------------------------------------------------------------------------------------------------------------------------------------------------------------------------------------------------------------------------------------------------------------------------------------------------------------------------------------------------------------------------------------------------------------------------|-----------------------------------------------------------------------------------------------------------------------------------------------------------------------------------------------------------------------------------------------------------------------------------------------------------------------------------------------------------------------------------------------------|-------------------------------------------------------------------------------------------------------------------------------------------------------------------------------------------------------------------------|
| <b>Primary Objective</b> <ul style="list-style-type: none"> <li>To evaluate the safety and tolerability of a prime boost vaccine regimen utilizing non-replicating simian adenovirus (ChAdOx1) followed by non-replicating poxvirus modified vaccinia virus Ankara (MVA) in adults in Eastern and Southern Africa</li> <li>To evaluate the specific T-cell immune responses induced by the ChAdOx1.tHIVconsv1 followed by MVA.tHIVconsv3&amp;4 vaccines in vaccine recipients</li> </ul> | <ul style="list-style-type: none"> <li>Proportion of volunteers who experience local and systemic reactogenicity events</li> <li>Proportion of volunteers with Grade 3 or 4 unsolicited adverse events</li> <li>Proportion of volunteers with vaccine related serious adverse events (SAEs)</li> <li>Proportion of vaccine recipients developing HIV-1 specific T-cell responses</li> </ul>         | <ul style="list-style-type: none"> <li>Within 7 days post vaccination</li> <li>Through 28 days post final vaccination</li> <li>Throughout the study period</li> <li>At 1 and 40 weeks post final vaccination</li> </ul> |
| <b>Secondary Objectives</b><br>To assess: <ul style="list-style-type: none"> <li>tHIVconsvX-specific T-cell responses for their frequency, breadth and duration in vaccine recipients</li> <li>Functional T-cell responses in vaccine recipients that inhibit replication <i>in vitro</i> of viruses of major HIV-1 clades A, B, C and D</li> </ul>                                                                                                                                      | <ul style="list-style-type: none"> <li>Frequency, breadth and duration of T-cell responses to conserved epitopes measured in the IFN-<math>\gamma</math> ELISPOT assay in each vaccine recipient</li> <li>Breadth of inhibition of HIV-1 viruses representative of circulating viruses in Kenya, Uganda and Zambia and other global clades in the <i>in vitro</i> Virus Inhibition Assay</li> </ul> | <ul style="list-style-type: none"> <li>At 1 and 40 weeks post final vaccination</li> <li>At 1 and 40 weeks post final vaccination</li> </ul>                                                                            |
| <b>Exploratory Objectives</b> <ul style="list-style-type: none"> <li>To assess induction of plurifunctional tHIVconsvX-</li> </ul>                                                                                                                                                                                                                                                                                                                                                       | <ul style="list-style-type: none"> <li>Proportions of mono-, bi- and tri-functional T cells in the vaccine recipients</li> </ul>                                                                                                                                                                                                                                                                    | <ul style="list-style-type: none"> <li>At 1 and 40 weeks post final vaccination</li> </ul>                                                                                                                              |

| Objectives                                                                                                                                                                                                                                                                                                                                                                  | Endpoints/Outcome Measures                                                                                                                                                                                                                                                               | Timepoint(s) of evaluation of this outcome measure (if applicable)                                                                                                                 |
|-----------------------------------------------------------------------------------------------------------------------------------------------------------------------------------------------------------------------------------------------------------------------------------------------------------------------------------------------------------------------------|------------------------------------------------------------------------------------------------------------------------------------------------------------------------------------------------------------------------------------------------------------------------------------------|------------------------------------------------------------------------------------------------------------------------------------------------------------------------------------|
| <p>specific memory T cells in the vaccine recipients</p> <ul style="list-style-type: none"> <li>• Characterization of the gut microbiome composition and richness</li> <li>• Feasibility of recruiting required sample size across all sites within 16 weeks</li> <li>• Feasibility of retaining at least 90% of enrolled volunteers to end of study.</li> <li>•</li> </ul> | <ul style="list-style-type: none"> <li>• Shotgun sequencing and metabolomic analyses</li> <li>• Proportion of target number of volunteers enrolled within 16 weeks</li> <li>• Proportion of enrolled volunteers that are retained in the study through the final study visit.</li> </ul> | <ul style="list-style-type: none"> <li>• Before vaccination, at 1 and 44 weeks post final vaccination.</li> <li>• 16 weeks post first enrolment</li> <li>• End of study</li> </ul> |

## 5 TRIAL DESIGN

HIV-CORE 006 is a double-blind placebo-controlled trial, in which the mosaic immunogens are delivered by a prime-boost regimen of non-replicating simian adenovirus followed by non-replicating poxvirus MVA. Volunteers will be randomised to receive either the vaccine regimen or placebo at 2 vaccination visits 4 weeks apart. The vaccine regimen consists of a single mosaic prime ChAdOx1.tHIVconsv1 (C1) and a dual boost of MVA.tHIVconsv3 (M3) and MVA.tHIVconsv4 (M4) administered simultaneously. The trial will recruit healthy African adults 18-50 years of age, who are HIV-uninfected and at low risk of HIV infection.

The trial is designed to enrol 88 healthy men and women, who will be randomised to receive either the vaccine regimen or placebo in a ratio of 72:16:

- Vaccine Arm (ChAdOx1.tHIVconsv1 prime followed by MVA.tHIVconsv3 and MVA.tHIVconsv4 boost at 4 weeks after enrolment); 72 vaccine recipients;
- Placebo Arm; 16 recipients

To maintain blinding, all volunteers will receive two injections with half dose into the deltoid region of each arm of ChAdOx1.tHIVconsv1 or placebo at enrolment, and two injections (MVA.tHIVconsv3 or placebo into one deltoid region and MVA.tHIVconsv4 or placebo into the other) at 4 weeks after enrolment. The primary goal of assessing safety and immunogenicity will be served by weighting the randomisation toward vaccinees.

Enrolment of all volunteers into HIV-CORE 006 is expected to take up to 16 weeks. Participation in the trial for each volunteer will be approximately 52 weeks and all volunteers will be followed up for 48 weeks after first vaccination.

Data will be collected from each volunteer from screening, enrolment and every scheduled and unscheduled visit on CRFs. CRFs will be entered into the electronic database system.



## **6 VOLUNTEER IDENTIFICATION**

### **6.1 Study Population**

The study population consists of healthy HIV-uninfected male or female adults aged 18-50 years, who are at low risk of HIV infection, based on a HIV risk assessment at screening, in Kenya, Uganda and Zambia.

### **6.2 Inclusion Criteria**

- Healthy male and female as assessed by a medical history, physical exam, and laboratory tests.
- At low risk of HIV infection and willing to maintain low-risk behaviour for the duration of the trial. Individuals from key populations are not excluded provided they are assessed to be at low risk of HIV infection at screening and are willing to maintain low-risk behaviour during the study.
- At least 18 years of age on the day of screening and have not reached their 51<sup>st</sup> birthday on the day of the first vaccination.
- Willing and able to give informed consent for participation in the trial before any study-related procedures are performed. Volunteers will pass an Assessment of Understanding before signing the consent form.
- Willing to comply with the requirements of the protocol and be available for follow up for the planned duration of the study.
- Willing to undergo HIV testing, risk reduction counselling, receive HIV test results
- All sexually active males (unless anatomically sterile or in a monogamous relationship with a female partner who uses a documented non-barrier method of birth control) must be willing to use an effective method of contraception (such as consistent condom use) from the day of first vaccination until 4 months after the last vaccination.
- If a female of childbearing potential, willing to use an effective non-barrier method of contraception (hormonal contraceptive or intrauterine device) from at least 2 weeks prior to first vaccination until at least 4 months after the last study vaccination. If not of childbearing potential: postmenopausal (>45 years of age with amenorrhea for at least 2 years, or any age with amenorrhea for at least 6 months and a serum follicle stimulating hormone [FSH] level >40 IU/L) or surgically sterile: no additional contraception required.
- All female volunteers must be willing to undergo urine pregnancy tests at time points indicated in the Schedule of Procedures and must test negative prior to each study vaccination.
- Willing to forego donations of blood or any other tissues during the trial and, for those who test positive for HIV antibodies due to vaccination (vaccine-induced seropositivity/ reactivity), until the anti-HIV antibody titres become undetectable.

### **6.3 Exclusion Criteria**

- Confirmed HIV-1 or HIV-2 infection
- Receipt of any vaccine in the previous 28 days or planned receipt within 28 days of Investigational Medicinal Product. Volunteers who expect to receive any adenoviral vectored vaccines within the next three months after ChAdOx1.tHIVconsv1 vaccine administration should not participate due to the risk of immune interference with the study vaccine.
- Participation in another clinical trial of an Investigational Medicinal Product currently, within the previous 3 months or expected participation during the study.

- Previous receipt of another investigational HIV vaccine candidate, or any adenoviral vectored vaccine (Note: receipt of an HIV vaccine placebo will not exclude a volunteer from participation if documentation is available and the Medical Monitor gives approval).
- Receipt of blood transfusion or blood-derived products within the previous 4 months or expectation of receiving blood products during the study period.
- Receipt of immunoglobulin products within the previous 3 months.
- If female, pregnant or planning a pregnancy during the period of enrolment until 4 months after the last study vaccination; or lactating.
- Any clinically relevant abnormality on history or examination such as:
  - Any confirmed or suspected history of immunodeficiency including recurrent severe infections;
  - Use of systemic corticosteroids for >14 days (use of topical or inhaled steroids is permitted) within the previous 6 months;
  - Immunosuppressive, anti-cancer, anti-tuberculosis or other medications considered significant by the investigator within the previous 6 months.
  - History of splenectomy.
  - History of autoimmune disease
  - Bleeding disorder diagnosed by a physician (e.g., factor deficiency, coagulopathy or platelet disorder that requires special precautions). (Note: a volunteer that states that he or she has easy bruising or bleeding but does not have a formal diagnosis and has intramuscular injections and blood draws without any adverse experience is eligible)
  - History of myocarditis, pericarditis, cardiomyopathy, congestive heart failure with permanent sequelae, or clinically significant arrhythmia (including any arrhythmia requiring medication, treatment, or clinical follow up).
  - History of cancer (except basal cell carcinoma of the skin)
  - Asthma that is not well controlled.
  - History of allergic disease or reactions likely to be exacerbated by any component of the vaccine
  - History of severe local or systemic reactogenicity to vaccines (e.g., anaphylaxis, respiratory difficulty, angioedema).
  - History of Guillain-Barre syndrome.
  - Confirmed diagnosis of active or chronic hepatitis B, hepatitis C, active syphilis and/or active tuberculosis
  - Seizure disorder: an individual who has had a seizure in the last 3 years is excluded (Not excluded: an individual with a history of seizures who has neither required medication nor had a seizure for three or more years).
  - History of serious psychiatric conditions or any psychiatric condition that precludes compliance with the protocol. Specifically excluded are persons with psychoses, ongoing risk for suicide, or history of suicide attempt or gesture within the past 3 years.
  - Substance abuse disorder that precludes compliance with the protocol as assessed by the investigator.
  - Any clinically significant acute or chronic medical condition that is considered unstable/progressive, or in the opinion of the Investigator, may either put the volunteer at risk because of participation in the study, or may influence the result of the study, or the volunteer's ability to participate in the study
- Abnormal clinically significant abnormal finding on screening biochemistry or haematology blood, or urinalysis, including but not limited to:  
Haematology:

- Haemoglobin - <9.5 g/dl in females; <11.0 g/dl in males
- Absolute Neutrophil Count (ANC) –  $\leq 1,000/\text{mm}^3$
- Absolute Lymphocyte Count (ALC) –  $\leq 650/\text{mm}^3$
- Platelets - <100,000 cells/ $\text{mm}^3$

#### Chemistry

- Creatinine >1.1 x upper limit of normal (ULN)
- AST >1.25 x ULN
- ALT >1.25 x ULN

#### Urinalysis

Clinically significant abnormal dipstick confirmed by microscopy:

- Protein = 2+ or more
- Blood = 2+ or more (not due to menses)
- Any other finding which in the opinion of the investigators would significantly increase the risk of having an adverse outcome from participating in the study
- If, in the opinion of the Principal Investigator, it is not in the best interest of the volunteer to participate in the trial.
- **NOTE:** Investigators should ensure that all study enrolment criteria have been met at the end of the screening period. If a volunteer's status changes at any time before the 1<sup>st</sup> dose of the study drug is given that they now meet an exclusion criterion, they should be excluded from participation in the study.

## **6.4 Recruitment of Volunteers**

Healthy adult male and female volunteers may be recruited through information presented in community organizations/settings, other institutions and/or advertisements to the general public or from existing cohorts. Each site will devise and use locally effective practices to recruit from the specific populations. All materials to be distributed to the volunteers will be submitted for approval by the Ethics Committee before they are used. Efforts will be made towards overall gender balance as a composite of enrolled volunteers.

## **7 TRIAL VISITS**

### **7.1 Screening and Eligibility Assessment**

Screening assessments will be performed up to 28 days before enrolment. Screening procedures will only be performed after the volunteer's written consent has been obtained and may be conducted over multiple days during the screening period.

Before screening, prospective volunteers will receive a study number. At screening, demographic and risk factor information will be collected, and HIV testing will be performed. Volunteers who are identified as being HIV-infected will be referred for further HIV treatment and care.

Reasons for screening failure will be obtained from volunteers who are not enrolled including those who are eligible but not enrolled. The procedures at this visit are summarized below and will be conducted:

- Provide and or review the Informed Consent Form with the volunteer and answer any relevant question that the volunteer may have about the study.

- Complete Assessment of Informed Consent Understanding (AOU). Please refer to the Study Operations Manual (SOM)

*If the volunteer agrees to participate, passes the AOU and provides written informed consent, study staff will:*

- Obtain written informed consent before performing any study procedures.
- Perform HIV testing, HIV test counselling and risk reduction counseling
- Administer HIV risk assessment
- Conduct family planning counselling, refer for contraceptive counseling if necessary
- Take a comprehensive medical history.
- Collect concomitant medication information.
- Perform a general physical examination including assessment of height, weight and vital signs;
- Collect specimens for all tests as indicated in the Schedule of Procedures see Appendix A (for details see the Laboratory Analytical Plan (LAP)).

When available, the screening laboratory tests will be reviewed by the trial physician. Screening laboratory test(s) may be repeated once at the discretion of the Principal Investigator or designee to investigate any isolated abnormalities.

If the screening visit occurs more than 28 days prior to the date of vaccination, all screening procedures must be repeated. In such cases, the comprehensive medical history may be replaced by an interim medical history and the Informed Consent Form should be reviewed.

If a volunteer has signed the Consent Form but does not meet the eligibility criteria, the records must be kept at the site.

## **7.2 Investigational Medicinal Product Administration Visit**

### **7.2.1 Vaccination Visit**

Volunteers will receive either a vaccine or placebo depending on the randomisation schedule. These visits are specified in the Schedule of Procedures (Appendix A).

*Prior to the first vaccination, site personnel will:*

- Review any questions the volunteer may have about the study
- Review the Informed Consent Form with the volunteer
- Review screening safety laboratory data
- Obtain pregnancy test results prior to investigational medicinal product administration
- Perform HIV testing, HIV test counselling and risk reduction counseling
- Administer HIV risk assessment
- Conduct family planning counselling as per site specific procedures and ensure compliance with respective contraceptive method
- Review interim medical history
- Collect concomitant medication information
- Assess baseline vital signs (blood pressure, heart rate, respiratory rate and temperature)

- Perform a general physical examination
- Assess cervical and axillary lymph nodes
- Assess for the presence at baseline of any signs and symptoms related to the solicited local and systemic reactogenicity/solicited adverse reactions that will be assessed after vaccination. This includes an examination of the administration site.
- Collect specimens for all tests as indicated in the Schedule of Procedures Appendix A
- Assign an allocation number to the volunteer according to the instructions specified in the Study Operations Manual.
- Administer the Investigational Medicinal Product as specified in Section 9.4. Administration of Investigational Medicinal Product and according to instructions in the Study Operations Manual.
- Observe volunteer closely for at least 30 minutes after administration for any acute (reactogenicity/solicited adverse reactogenicity /solicited adverse reactions) and train the volunteer on using the memory aid
- Assess any other adverse events

*Subsequent vaccine/investigational medicinal product administration visits:*

Study staff will perform the same procedures as above with the following additions:

- Review the routine safety laboratory parameters as appropriate from previous visit prior to each vaccine administration, if a volunteer has an abnormal value that is known at the time of vaccination, follow the specified guidelines (Section 12.0)
- Conduct HIV test counselling if an HIV Test is scheduled (Appendix A) or clinically indicated.
- It is recommended that all participants receive a dose of paracetamol prior to administration of the MVA-vectored vaccines. This recommendation is based on a high rate of adverse reactions, including severe (Grade 3) adverse reactions, noted following administration of the MVA-vectored vaccines.

Volunteers will receive investigational medicinal products at timepoints as specified in the schedule of procedures. If volunteers are seen outside the product administration visit windows, administration of IMP may be done in consultation with the Medical Monitor. All unscheduled visits will be documented in the volunteers' study records on applicable source documents and entered into the Case Report Form (CRF).

### **7.2.2 Post Vaccination Visits**

The volunteer will be asked to return to the clinic on Day 7 (+/- 3 days), Day 14 (+/- 3 days) and Day 28 (+/- 3 days) after each vaccination for an assessment by clinic staff. A telephone contact or clinic visit will be conducted after each vaccination according to the Schedule of Procedures (Appendix A).

The volunteer will be asked to maintain a Memory Aid from the day of each vaccination and for the next 7 days. Study staff will review the Memory Aid and solicit local and systemic reactogenicity with the volunteer to determine the severity of the reactions through discussions with the volunteer.

The following procedures will be conducted at these visits:

- Review and record interim medical history
- Collect concomitant medication

- Perform a symptom directed physical examination including vital signs (pulse, respiratory rate, blood pressure and temperature), examination of vaccination site(s) and cervical and axillary lymph nodes in addition to any further examination indicated by history or observation
- Solicit and record serious and non-serious adverse events
- Obtain a blood sample for laboratory investigations in keeping with the schedule of procedures (Appendix A) and the Laboratory Analytical Plan

### **7.3 Additional Follow-up Visits**

Assessments and procedures will be performed according to the Schedule of Procedures (Appendix A)

### **7.4 Final Study Visit or Early Termination Visit**

The Final Visit or Early Termination Visit procedures will be performed according to the Schedule of Procedures (Appendix A). Volunteer retention strategies and procedures must be established at the site with a goal to achieve an annual retention rate of at least 90%. Volunteers may voluntarily withdraw from the study at any time and for any reason. Volunteers may be withdrawn from the study permanently if:

- The principal investigator(s) or designee has reason to believe that a volunteer is not complying with the study or study procedures.
- The sponsor or local regulatory authorities decide to stop or cancel the study.
- Volunteer is lost to follow up.

If a volunteer withdraws from the study, the date and reasons for study withdrawal (if available) will be recorded in the volunteer's source documents and study records and stored samples will be retained unless consent is withdrawn.

### **7.5 Unscheduled Visits**

Visits / contacts other than those described in the Schedule of Procedures (Appendix A) will be classified as unscheduled visits and recorded on applicable source documents and entered into the designated CRF. They may occur:

- For administrative reasons e.g. the volunteer may have questions for the study staff or may need to re-schedule a follow up visit
- To review a laboratory investigation from a previous visit
- To review the outcome of an adverse event
- To conduct a study, visit where a volunteer has missed the scheduled study visit window
- For any other reason requested by the volunteer or Principal Investigator

## **8 STUDY PROCEDURES**

### **8.1 Informed Consent Process**

The study site staff is responsible for developing study informed consent documents for local use based on the core informed consent form developed by the sponsor/ designee. This document is translated (if necessary) submitted and approved by an Independent Ethics Committee (EC) Institutional Review Board (IRB).

The person obtaining the consent will be suitably qualified and experienced and will have been authorised to do so by the Principal Investigator.

All volunteers will give their consent to participate in the study on the basis of appropriate information and with adequate time to consider this information and ask questions. The volunteers will be allowed as much time as they wish to consider the information, and the opportunity to question the Investigator or other independent parties to decide whether they will participate in the trial. Prior to enrollment, the consent form will be reviewed with the volunteer. The informed consent form will be reviewed with them in person to enable discussion of: the exact nature of the study; the implications and constraints of the protocol; the known side effects and any risks involved in taking part. It will be clearly stated that the volunteer is free to withdraw from the study at any time for any reason without prejudice to future care, and with no obligation to give the reason for withdrawal. After reading the informed consent form (ICF), the assessment of understanding (AOU) will be administered. Volunteers who fail the AOU may repeat the test only once. Volunteers must pass the AOU before signing the ICF.

Written Informed Consent will then be obtained by means of a dated volunteer signature and dated signature of the person who presented and obtained the informed consent. If the volunteer is functionally illiterate, the consent document must be read to them in the language that they best understand in the presence of a literate impartial witness who will not be evaluating the volunteer directly and who will sign and date the informed consent as a witness. The signed/marked and dated informed consent form must be stored at the study site for verification. A copy of the signed/marked and dated informed consent form will be offered to the volunteer to take home if the volunteer is willing. If not, the volunteer's copy will be filed at the site.

Volunteers will be informed prior to consenting that they are free to withdraw from the study at any time without any penalty or loss of benefits that, otherwise, they would have been entitled to receive. This includes, but is not limited to, social and medical benefits as well as future care at the study site or clinic. Volunteers will be informed about any changes to the study, if any, through an amended informed consent.

### **8.1.1 Consent for Future Use of Samples**

Volunteers may also provide consent for the long-term storage of their research samples for possible use in future HIV or other disease research. These sample will be de-identified and archived, and the testing laboratories will be blinded to the volunteer's identity. Only tests approved by an appropriate institutional Review Board (IRB)/ Independent Ethics Committee (IEC) will be performed. Volunteers could withdraw consent for long-term storage at any time before de-identification of samples by contacting the study team. If volunteers choose not to allow the future use of the remaining samples, they will be destroyed at the end of the trial, in accordance with local laws and SOPs.

## **8.2 Medical History and Physical Examination**

### **Medical History**

At screening, a comprehensive medical history will be collected including previous vaccinations and reaction to vaccinations, history of STI and contraceptive practices. At subsequent visits, an interim medical history will be performed.

### **Physical Examination**

#### General Physical Examination

A general physical examination includes examination of skin, respiratory, cardiovascular, abdominal, limited neurological, musculoskeletal, systems, general appearance, Head/ENT (Ear Nose and Throat), neck and extremities at the time points indicated in the schedule of procedure (see Appendix A)

#### Symptom-Directed Physical Examination

A symptom-directed physical examination includes the examination of any systems that are indicated by history or observation. This examination is done at the time points indicated in the schedule of procedure (see Appendix A)

#### Measuring Height and Weight

Includes measuring the height and weight at the time points indicated in the schedule of procedure (see Appendix A)

#### Vital Signs

Vital signs including blood pressure, heart rate, respiratory rate, blood pressure and temperature are measured and recorded at the time points indicated in the Schedule of Procedures (see Appendix A)

## **8.3 HIV Testing and HIV- test Counselling**

Trained and qualified study personnel will provide HIV counseling and testing at designated study visits as indicated in the schedule of procedures (Appendix A), and it will be performed according to a predefined, approved SOP. Counseling will be provided in compliance with national guidelines and locally accepted



standards of practice. Study sites will document their counseling policies and procedures prior to study initiation for purposes of staff training, QA, and study monitoring.

The counseling process will, at a minimum, include information on HIV, safe sex practices and risk reduction. The objective of counseling is to ensure that volunteers have sufficient knowledge about HIV infection to understand what the test is for, the implications of a positive or negative result and the care available for HIV infection locally. Additionally, risk reduction counseling, safe sex practices, proven methods of preventing HIV acquisition and avoidance of transmission to others will be discussed with all volunteers regardless of their HIV test results.

Condoms and other HIV prevention supplies will be offered to volunteers at each visit. Volunteers who are infected with HIV at screening and during follow up will be counseled and referred for care and treatment as needed. Counseling for HIV infected volunteers will include:

- Psychological and social implications of HIV infection
- Implications for sexual partners and family members
- Implications for child-bearing
- Avoidance of transmission to others in future
- Where to obtain HIV counseling, care and treatment

#### **8.4 Combination prevention of HIV acquisition**

Site counsellors will provide HIV risk reduction counselling based on reported individual risk at time points specified in the Schedule of Procedures (Appendix A) and provide free condoms. The procedures for risk reduction counselling will be detailed in site-specific SOPs. In addition, regular testing as well as treatment for sexually transmitted infections (STIs) will be provided. Counselling and referral for post exposure prophylaxis (PEP) will be provided when indicated. Information and referral for male circumcision will be carried out as well.

Oral pre-exposure prophylaxis (PrEP) is a HIV prevention option. Following national guidelines at the individual study sites, volunteers will receive information about the protection from HIV infection by oral PrEP. Study sites will facilitate access to PrEP services through referral to or providing PrEP on-site where available. At a minimum, sites will provide information on PrEP and refer interested volunteers to PrEP providing service providers or demonstration projects where they exist. Alternatively, where these services are in place, the clinical research centres may provide PrEP at the study centre. Volunteers will be informed as new prevention modalities are proven effective and become available.

#### **8.5 Family Planning Counselling**

Study staff will counsel volunteers about the importance of preventing pregnancies and use of condoms as well as other effective family planning methods, as appropriate. Volunteers may be referred for family planning services either on-site or to a family planning clinic, as necessary and according to site-specific SOPs as detailed in the SOM. Contraceptive methods chosen and compliance will be documented.

Women of childbearing potential (e.g., not menopausal or surgically sterile) must use an effective, non-barrier form of family planning, such as hormonal methods or an intrauterine device, from one month prior to vaccination to at least 4 months after receiving the last dose of the study vaccine. All volunteers will be strongly encouraged to use condoms throughout the duration of the study.

Appropriate interactive counselling will be provided to help volunteers determine the most appropriate form of family planning according to individual needs.

## **8.6 Randomisation, blinding and unblinding**

Volunteers will be identified by a unique study identification number which will be assigned upon commencement of screening.

Volunteers will be randomised according to the randomisation schedule prepared by the statisticians at the Data Coordinating Centre (DCC) prior to the start of the study. Volunteers will be automatically assigned a unique allocation number as they are enrolled into the data entry system, corresponding to an allocation number on the unblinding list that will be provided to the unblinded site pharmacist by the DCC.

This is a double-blind study. Study staff (investigator and clinical personnel monitoring the safety and laboratory assay results) and volunteers will be blinded with respect to the allocation of Investigational Medicinal Product (vaccine or placebo).

A volunteer will be considered enrolled once he/she has been assigned an allocation number.

Volunteers will be informed about their assignment (vaccine/placebo) at study completion, once the database is locked. Should a study volunteer be unblinded during the study, further administration of the Investigational Medicinal Product (vaccine or placebo) will be discontinued. The study volunteer will be followed up until the end of the study according to Schedule of Procedures (Appendix A).

## **8.7 Un-blinding Procedure for Individual Volunteer**

When indicated (in the event of a medical emergency where the study physician believes the management/medical treatment of the volunteer would be altered by the knowledge of the group assignment), an individual volunteer can be un-blinded by the principal investigator after consultation with the study medical monitor. The procedures and contact numbers for un-blinding are outlined in the SOM.

The un-blinded information should be restricted to a small group of individuals involved in clinical management/medical treatment of the volunteer (e.g., treating physician) and the blind must be maintained for those responsible for the study assessments.

The reasons for un-blinding should be documented and the sponsor, the medical monitor and the DCC should be notified as soon as possible.

In the event that *accidental* un-blinding of an individual volunteer occurs, the P.I. or study physician must report the occurrence promptly to the sponsor. All details surrounding the accidental un-blinding must be documented.

## **8.8 Sample Handling**

Approximately 650 ml of blood from volunteers will be drawn over a period of 12 months. The study site will adhere to the Laboratory Analytical Plan (AP), the study-specific procedures manual/operations manual, and both local and sponsor SOPs for proper collection, processing, labeling, transport, and storage

of specimens. Specimen collection, testing, and storage at the laboratory will also be documented in compliance with Good Clinical Laboratory Practices.

In the event of an abnormal laboratory value, volunteers may be asked to have an additional sample collected at the discretion of the Principal Investigator or designee.

## **9 INVESTIGATIONAL MEDICINAL PRODUCT (IMP)**

### **9.1 IMP Description**

There are three investigational medicinal products to be studied in HIV-CORE 006 and one placebo. All investigational medicinal products were manufactured under Good Manufacturing Practices and in compliance with European Union GMP guidelines, Annex 13. Prior to IM injection the vaccines will be prepared by a trained and unblinded pharmacy member who will have no contact with the clinic or volunteers. The prepared IMP syringes will be masked to maintain the blind.

Two of the IMPs are MVA-based vaccines called MVA.tHIVconsV3 and MVA.tHIVconsV4. Both were manufactured, labeled and technically released by IDT Biologika GmbH in Dessau-Rosslau, Germany. MVA is an efficient single-round expression vaccine vector that is itself incapable of replication and spread in mammals. Both MVA.tHIVconsV3 and MVA.tHIVconsV4 contain a transgene (insert) coding for 6 conserved HIV regions that are fused together to form a chimeric protein immunogen. These 6 regions are arranged in different unique orders.

MVA.tHIVconsV4 and MVA.tHIVconsV3 vaccines are presented as white cloudy solutions, formulated in Tris-saline buffer (10 mM Tris HCl, 140 mM NaCl, pH 7.7) at a concentration of  $1.8 \times 10^8$  pfu/ml for MVA.tHIVconsV4 and  $3.4 \times 10^8$  pfu/ml for MVA.tHIVconsV3. The extractable fill volume is 500 µl. The products are supplied in sterile rubber-stopped glass vials. The vials are stored frozen below -65 °C.

The other IMP is a Chimpanzee Adenovirus-based vaccine called ChAdOx1.tHIVconsV1. It was manufactured, labeled and technically released by Advent S.r.l. in Rome, Italy. The ChAdOx1 vaccine vector is an engineered, non-replicating vector derived from simian adenovirus. ChAdOx1.tHIVconsV1 contains a transgene (insert) coding for 6 conserved HIV regions that are fused together to form chimeric protein immunogen.

The ChAdOx1.tHIVconsV1 vaccines are supplied in standard glass vials with rubber stoppers and caps. It is a slightly opaque frozen liquid supplied at a target concentration of  $>1.1 \times 10^{11}$  vp/ml. The fill volume per vial is 0.65 ml. The vials are stored frozen below -65 °C.

All the vaccines will be labeled according to EU requirements for primary and secondary labels.

The placebo to be used in the study is normal saline and can be stored at 2-8 °C or at room temperature (25 °C ± 5 °C).

A description of all of the Investigational Medicinal Products is summarized in Table 9.1-1.

**Table 9.1-1 Description of Investigational Medicinal Products**

| Vaccine/Placebo    | Formulation                                                                                                                                 | Concentration                | Dosage                  | Total Volume in Vial (ml) | Total Volume to be injected (ml) | Route of Admin. |
|--------------------|---------------------------------------------------------------------------------------------------------------------------------------------|------------------------------|-------------------------|---------------------------|----------------------------------|-----------------|
| MVA.tHIVconsv3     | 10 mM Tris-HCl, 140 mM NaCl, pH 7.7                                                                                                         | $3.4 \times 10^8$ pfu/mL     | $1.0 \times 10^8$ pfu   | 0.52 ml                   | 0.3 ml                           | IM              |
| MVA.tHIVconsv4     | 10 mM Tris-HCl, 140 mM NaCl, pH 7.7                                                                                                         | $1.8 \times 10^8$ pfu/mL     | $0.9 \times 10^8$ pfu   | 0.5 ml                    | 0.5 ml                           | IM              |
| ChAdOx1.tHIVconsv1 | 10 mM L-Histidine, 35 mM Sodium Chloride, 1 mM Magnesium Chloride, 0.1% (w/v) PS80, 7.5% (w/v) Sucrose, 0.5% (v/v) Ethanol and 0.1 mM EDTA. | $1.3 \times 10^{11}$ vp / ml | $5.0 \times 10^{10}$ vp | 0.65 ml                   | 0.4 ml                           | IM              |
| Placebo            | 0.9% Sodium Chloride                                                                                                                        | TBD                          |                         | 1.0 ml                    | 0.3-0.5 ml                       | IM              |

IM = Intramuscular

## 9.2 Shipment and Storage of IMP

The MVA.tHIVconsv3, MVA.tHIVconsv4 and ChAdOx1.tHIVconsv1 investigational medicinal products are stored frozen below -65 °C. Normal saline for the placebo can be stored at 2-8 °C or at room temperature (25 °C ± 5 °C).

Authorisation to ship the Investigational Medicinal Product to the clinical site will be provided in writing by the Sponsor, upon confirmation that all required critical documents for shipment authorisation have been completed. The MVA.tHIVconsv3, MVA.tHIVconsv4 and ChAdOx1.tHIVconsv.1 vaccine candidates will be shipped on dry ice with a temperature monitoring device included inside the shipping container. Placebo can be shipped at ambient temperature.

Upon receipt at the pharmacy, the IMPs are inspected and then stored in a secure location in the pharmacy at the proper temperature. IMPs must be stored under continuous temperature monitoring for the duration of the clinical study.

### **9.3 Preparation of Investigational Medicinal Product (IMP)**

Detailed instructions are provided in the SOM for preparing each of the investigational medicinal products. Volunteers will be randomised to receive either the investigational medicinal product or placebo. The pharmacist will be unblinded, but the study physician or designee administering the vaccine, clinical and laboratory staff, and PI will all be blinded. The dosage volumes to be administered are listed in Table 9.1-1. Instructions for reconciliation of used vials and subsequent disposal will be provided in the SOM. Syringes or other components that come in direct contact with Investigational Medicinal Products will be disposed of in a biohazard container and incinerated or autoclaved

### **9.4 Administration of Investigational Medicinal Product**

IMP will be administered by intramuscular injection at the timepoints specified in the Schedule of Procedures (Appendix A).

Volunteers will receive two IM injections with half dose of ChAdOx1.tHIVconsV1 into each arm at enrollment, and two IM injections (MVA.tHIVconsV3 into one arm and MVA.tHIVconsV4 into the other arm) at the second vaccination visit.

The preferred site of administration is the deltoid muscle, unless contraindicated for any reason.

Complete instructions for administration of the Investigational Medicinal Product are supplied in the Study Operations Manual.

### **9.5 Accountability and Disposal of the Investigational Medicinal Product**

A verifier will be required to double check and document each step of IMP preparation. All used vials will be returned to the IMP dispenser or pharmacy at the end of each vaccination visit. Accountability of the IMP will be maintained as follows:

- The date, vial allocation number and location of storage of the returned vials will be recorded.
- During the study, the investigational medicinal product accountability forms including dispensing and returning of vials will be kept and monitored.
- Accountability logs will be kept and monitored for each IMP for the duration of the study, to track vials received and dispensed.
- Used, empty vials will either be retained by the pharmacy until reconciliation by the monitor or the vial labels will be removed from used IMP vials and affixed to pharmacy documentation and the empty vials will be discarded as per site procedures.
- At the end of the study, the used and unused vials will be handled according to instructions of the Sponsor.
- Further information on Accountability and Disposal is supplied in the Study Operations Manual.

## **10 ASSESSMENTS**

### **10.1 Safety Assessments**

Data on local and systemic reactogenicity will be collected by structured interview and medical examination. Data on other adverse events will be collected with open-ended questions. All data will be recorded on the appropriate source documents and entered into the study database.

Signs and symptoms related to local and systemic reactogenicity events will be assessed by study staff prior to vaccination and at least 30 minutes post-vaccination as specified in the Schedule of Procedures (Appendix A).

Volunteers will be provided with and instructed on the use of Memory Aid to collect and grade reactogenicity events. Study staff will review the Memory Aid data with the volunteers before recording it in the volunteer source chart.

Data on other adverse events will be collected with open-ended questions. All data will be recorded on the appropriate source documents and entered into the study database.

#### **10.1.1 Local reactogenicity**

The presence of local reactogenicity will be assessed at the time points specified in the Schedule of Procedures (Appendix A).

Pain, tenderness, erythema/skin discoloration, swelling/hardening or thickening will be assessed and graded using Appendix C, Adverse Event Severity Assessment Table, as a guideline.

#### **10.1.2 Systemic reactogenicity**

The presence of systemic reactogenicity will be assessed at the time points specified in the Schedule of Procedures (Appendix A).

Fever, chills, headache, nausea, vomiting, malaise, sweating, fatigue, myalgia, and arthralgia will be assessed and graded using the Appendix C, Adverse Event Severity Assessment Table as a guideline.

#### **10.1.3 Unsolicited Adverse Events**

Unsolicited adverse events (AEs) will be collected through 28 days post final vaccination. Serious Adverse Events (SAEs) will be collected throughout the entire study period.

Open ended questions will be asked at time points according to the Schedule of Procedures (Appendix A). All adverse events will be graded using Appendix C, Adverse Event Severity Assessment Table, as a guideline and will be assessed for causality to the IMP. For more information regarding adverse events refer to Section 11, Safety Reporting.

#### **10.1.4 Assessment of Lymph Nodes**

At each vaccination visit, an assessment of cervical and axillary lymph nodes is performed by study staff prior to vaccination, and at reactogenicity visits as specified in Schedule of Procedures (Appendix A). If lymphadenopathy is increased relative to baseline, it will be followed until resolution.

#### 10.1.5 Vital Signs

At each vaccination visit, vital signs (pulse, respiratory rate, blood pressure and temperature) will be measured by study staff prior to vaccination and at least 30 minutes post-vaccination.

For the other study visits, vital signs will be assessed at the time points specified in the Schedule of Procedures (Appendix A).

#### 10.1.6 Concomitant Medications

Concomitant receipt of Investigational Medicinal Products, including other HIV vaccines, is prohibited during the study. Contraceptive use and significant medication ongoing at study entry will be documented.

During the study, information regarding concomitant medications and reasons for their use will be solicited from the study volunteers from enrolment through 28 days post final vaccination. Ongoing concomitant medications will be recorded until the end of the study.

#### 10.1.7 Routine laboratory parameters

Table 10.1.7-1 shows the laboratory parameters that will be measured routinely. The samples for these tests will be collected at the time points indicated in the Schedule of Procedures (Appendix A).

**Table 10.1.7-1: Laboratory Parameters**

| Laboratory Parameter | Test                                                                                                                                                   |
|----------------------|--------------------------------------------------------------------------------------------------------------------------------------------------------|
| Haematology          | Haemoglobin, haematocrit, leukocytes, platelets, absolute neutrophil count (ANC), absolute lymphocyte count (ALC)                                      |
| Clinical Chemistry   | Liver function tests: aspartate aminotransferase (AST), alanine aminotransferase (ALT), total and direct bilirubin.<br><br>Kidney function: creatinine |
| Urinalysis           | Dipstick test for protein, blood glucose, ketones, esterase (leukocytes) and nitrite. If clinically significant abnormalities (e.g.                    |

|  |                                                                                                                            |
|--|----------------------------------------------------------------------------------------------------------------------------|
|  | blood, protein, leukocytes) are found on dipstick test, then further test(s) will be performed (e.g. microscopy, culture). |
|--|----------------------------------------------------------------------------------------------------------------------------|

#### 10.1.8 Specific screening tests

Volunteers will be screened to exclude the following diseases:

- Hepatitis B: positive for hepatitis B surface antigen (HBsAg)
- Hepatitis C: positive for hepatitis C virus antibodies (HCV antibodies)
- Active syphilis: confirmed diagnosis (e.g., positive RPR confirmed by TPHA)

### 10.2 Immunogenicity Assessments

#### 10.2.1 Cellular Responses

T cell responses will be determined initially by an Ex Vivo IFN- $\gamma$  ELISPOT assay using a panel of overlapping peptides covering the length of the immunogen. Induction of T cells that can inhibit replication in vitro of viruses of major HIV-1 clades A, B, C and D will be assessed by a viral inhibition assay using a panel of infectious molecular clones representative of circulating viruses at the study site and other global clades. T cell polyfunctionality and the induction of immunological memory and homing patterns of T cells will be examined by intracellular cytokine staining by flow cytometry. Detailed epitope mapping studies are also planned again using flow cytometry to more fully examine the depth of vaccine induced T cell responses.

#### 10.2.2 Antibody Responses

The induction of antibody will be measured by a standard endpoint ELISA assay using peptides covering the immunogen.

#### 10.2.3 PBMC, Serum and Plasma Storage

PBMC, serum and plasma samples will be stored as indicated in the Laboratory Analytical Plan (LAP) and analysed for the purposes outlined within this protocol. Consent will be sought for long-term storage, for up to 15 years, of research samples for possible use in future HIV or other disease research. Samples not consented for long-term storage are to be stored until study close out and thereafter disposed of following the local country requirements and regulations relating to the disposal of biological research samples.



### **10.3 Other Assessments**

#### **10.3.1 HLA Typing**

Samples for HLA typing will be collected as specified in the Laboratory Analytical Plan and may be analysed as warranted.

#### **10.3.2 Microbiome Testing**

Characterization of the gut microbiome composition and richness will be done using a shotgun sequencing and we may also perform extensive metabolomic analyses, which show associations with microbial dysbiosis. Volunteers will be given the option to provide faecal samples which will be collected at the timepoints indicated in the Schedule of Procedures (Appendix A).

#### **10.3.3 HIV testing**

Samples will be tested at the time points indicated in the Schedule of Procedures (Appendix A). Further information is specified in Section 12.1 HIV Testing

#### **10.3.4 Pregnancy Test**

A urine pregnancy test for all female volunteers will be performed by measurement of Human Chorionic Gonadotrophin ( $\beta$ hCG) at time points indicated in the Schedule of Procedures (Appendix A). The results of the pregnancy test must be negative prior to each vaccination.

#### **10.3.5 HIV Risk Assessment**

Study staff will assess volunteers for their past and current risk of acquiring HIV at time points indicated in Schedule of Procedures (Appendix A).

#### **10.3.6 Social Impact Assessment**

Each volunteer will have a social impact assessment administered at the time point specified in the Schedule of Procedures (Appendix A). This assessment is intended to assess the impact of trial participation on the volunteer's personal and professional life.

## 11 SAFETY REPORTING

### 11.1 Definitions

|                                                       |                                                                                                                                                                                                                                                                                                                                                                                                                                                                                                                                                                                                                                                                                                                                                                                                                                                     |
|-------------------------------------------------------|-----------------------------------------------------------------------------------------------------------------------------------------------------------------------------------------------------------------------------------------------------------------------------------------------------------------------------------------------------------------------------------------------------------------------------------------------------------------------------------------------------------------------------------------------------------------------------------------------------------------------------------------------------------------------------------------------------------------------------------------------------------------------------------------------------------------------------------------------------|
| Adverse Event (AE)                                    | Any untoward medical occurrence in a volunteer to whom a medicinal product has been administered, including occurrences which are not necessarily caused by or related to that product.                                                                                                                                                                                                                                                                                                                                                                                                                                                                                                                                                                                                                                                             |
| Adverse Reaction (AR)                                 | <p>An untoward and unintended response in a volunteer to an investigational medicinal product which is related to any dose administered to that volunteer.</p> <p>The phrase "response to an investigational medicinal product" means that a causal relationship between a trial medication and an AE is at least a reasonable possibility, i.e. the relationship cannot be ruled out.</p> <p>All cases judged by either the reporting medically qualified professional or the Sponsor as having a reasonable suspected causal relationship to the trial medication qualify as adverse reactions.</p>                                                                                                                                                                                                                                               |
| Serious Adverse Event (SAE)                           | <p>A serious adverse event is any untoward medical occurrence that:</p> <ul style="list-style-type: none"><li>• results in death</li><li>• is life-threatening</li><li>• requires inpatient hospitalisation or prolongation of existing hospitalisation</li><li>• results in persistent or significant disability/incapacity</li><li>• consists of a congenital anomaly or birth defect.</li></ul> <p>Other 'important medical events' may also be considered serious if they jeopardise the volunteer or require an intervention to prevent one of the above consequences.</p> <p>NOTE: The term "life-threatening" in the definition of "serious" refers to an event in which the volunteer was at risk of death at the time of the event; it does not refer to an event which hypothetically might have caused death if it were more severe.</p> |
| Serious Adverse Reaction (SAR)                        | An adverse event that is both serious and, in the opinion of the reporting Investigator, believed with reasonable probability to be due to one of the investigational medicinal products, based on the information provided.                                                                                                                                                                                                                                                                                                                                                                                                                                                                                                                                                                                                                        |
| Suspected Unexpected Serious Adverse Reaction (SUSAR) | <p>A serious adverse reaction, the nature and severity of which is not consistent with the information about the medicinal product in question set out:</p> <ul style="list-style-type: none"><li>• in the case of a product with a marketing authorisation, in the summary of product characteristics (SmPC) for that product</li></ul>                                                                                                                                                                                                                                                                                                                                                                                                                                                                                                            |

|  |                                                                                                                                                                                        |
|--|----------------------------------------------------------------------------------------------------------------------------------------------------------------------------------------|
|  | <ul style="list-style-type: none"> <li>• in the case of any other investigational medicinal product, in the investigator's brochure (IB) relating to the trial in question.</li> </ul> |
|--|----------------------------------------------------------------------------------------------------------------------------------------------------------------------------------------|

NB: to avoid confusion or misunderstanding of the difference between the terms "serious" and "severe", the following note of clarification is provided: "Severe" is often used to describe intensity of a specific event, which may be of relatively minor medical significance. "Seriousness" is the regulatory definition supplied above.

For any pregnancy occurring during the clinical trial, the outcome of the pregnancy should be recorded and the infant followed up for congenital abnormalities or birth defects; should any abnormalities be detected, they would fall within the definition of "serious".

## 11.2 Causality

Assessment of relationship of an AE or SAE to IMP is the responsibility of the Principal Investigator or designee. All medically indicated and available diagnostic methods (e.g., laboratory, blood smear, culture, X-ray, etc.) should be used to assess the nature and cause of the AE/SAE. Best clinical and scientific judgment should be used to assess relationship of AE/SAEs to the IP and/or other cause.

The following should be considered:

- Presence/absence of a clear temporal (time) sequence between administration of the Investigational Medicinal Product and the onset of AE/SAE
- Presence/absence of another cause that could more likely explain the AE/SAE (concurrent disease, concomitant medication, environmental or toxic factors)
- Whether or not the AE/SAE follows a known response pattern associated with the Investigational Medicinal Product

The relationship assessment should be reported as one of the following:

**Not Related:** clearly explained by another cause (concurrent disease, concomitant medication, environmental or toxic factors, etc.).

**Unlikely:** more likely explained by another cause (concurrent disease, concomitant medication, environmental or toxic factors, etc.).

**Possibly:** equally likely explained by another cause but the possibility of the Investigational Medicinal Product relationship cannot be ruled out (e.g., reasonably well temporally related and/or follows a known Investigational Medicinal Product response pattern but equally well explained by another cause).

**Probably:** more likely explained by the Investigational Medicinal Product (e.g., reasonably well temporally related and/or follows a known Investigational Medicinal Product response pattern and less likely explained by another cause).

**Definitely:** clearly related and most likely explained by the Investigational Medicinal Product.

For the purpose of expedited safety reporting, all possibly, probably or definitely related AEs are considered Investigational Medicinal Product-related AEs.

### **11.3 Assessment of Severity of Adverse Events**

The severity of events will be assessed on the following scale: Grade 1 = mild, Grade 2 = moderate, Grade 3 = severe, Grade 4 = very severe (potentially life threatening).

The following general criteria should be used in assessing adverse events as mild, moderate, severe or very severe at the time of evaluation:

Grade 1 (Mild): Symptoms causing no or minimal interference with usual social & functional activities

Grade 2 (Moderate): Symptoms causing greater than minimal interference with usual social & functional activities

Grade 3 (Severe): Symptoms causing inability to perform usual social & functional activities

Grade 4 (Very severe/Potentially Life Threatening): Symptoms causing inability to perform basic self-care functions OR Medical or operative intervention indicated to prevent permanent impairment, persistent disability, or death

Guidelines for assessing the severity of specific adverse events and laboratory abnormalities are listed in Appendix C, Adverse Event Severity Assessment Table.

AEs considered related to the trial medication as judged by a medically qualified investigator or the Sponsor will be followed either until resolution, or the event is considered stable.

It will be left to the Investigator's clinical judgment to decide if an AE is of sufficient severity to require the volunteer's discontinuation from further vaccination. A volunteer may also voluntarily withdraw from further vaccination due to what he or she perceives as an intolerable AE. If either of these occurs, the volunteer must be given appropriate care under medical supervision until symptoms cease, or the condition becomes stable.

### **11.4 Procedures for Recording Adverse Events**

All AEs occurring from enrolment through 28 days post final vaccination that are observed by the Investigator or reported by the volunteer, will be recorded on the CRF, whether or not attributed to trial vaccination.

The following information will be recorded: description, date of onset and end date, severity, whether or not it is a serious adverse event, assessment of relatedness to investigational medicinal products and whether treatment was required. Follow-up information should be provided as necessary.

### **11.5 Reporting Procedures for Serious Adverse Events**

Serious Adverse Events (SAEs) should be reported to the sponsor/designee within 24 hours of the site becoming aware of the event, and sent to the Sponsor as described in the SOM.

To discuss Investigational Medicinal Product-related SAEs or any urgent medical questions related to the SAE, the site investigator should contact one of the sponsor/designee directly (see Contact List in the SOM).

The SAE Report Form should be completed with all the available information at the time of reporting and sent to the Sponsor as described in the SOM. The minimum data required in reporting an SAE are the study identification number, date of birth, gender, event description (in as much detail as is known at the time), onset date of event (if available), reason event is classified as serious, reporting source (name of Principal Investigator or designee), and relationship to the Investigational Medicinal Product as assessed by the investigator.

The Data Monitoring and Ethics Committee (DMEC) will also be informed by the local PI of SAEs immediately or within 24 hours of awareness. The DMEC will review the SAE and confirm agreement with the investigator's assessment of relationship to vaccine and whether any specific safety measures are required (e.g. whether to delay or halt vaccinations). The DMEC will respond either via email or by teleconference as necessary.

The Principal Investigator or designee must notify the local REC of all SAEs as appropriate. In case of Investigational Medicinal Product-related SAEs, the Sponsor will notify responsible regulatory authorities, and other study sites where the same Investigational Medicinal Product is being tested.

The Principal Investigator or designee is required to prepare a detailed written report with follow up until resolution or until it is judged by the Principal Investigator or designee to have stabilized.

More details on SAE definitions and reporting requirements are provided in the SOM.

### **11.6 Expectedness**

Expectedness will be determined according to the Investigator's Brochure.

### **11.7 SUSAR Reporting**

All SUSARs will be reported by the Principal investigator to the relevant Regulatory Authority and to the Ethics Committees and other parties as applicable. For fatal and life-threatening SUSARS, this will be done no later than seven calendar days after the Sponsor or delegate is first aware of the reaction or following timelines required in the individual countries, whichever one is more stringent. Any additional relevant information will be reported within 8 calendar days of the initial report. All other SUSARs will be reported within 15 calendar days.

Allocation codes will be un-blinded for specific volunteers.

**Principal Investigators will be informed of all SUSARs for all studies with the same IMP, whether or not the event occurred in the current trial.**

### **11.8 Clinical Management of Adverse Events**

The clinical study team will manage adverse events (AEs). They will assess volunteers, provide first line of care as appropriate and refer to health care and treatment facilities as warranted. If any

treatment/medical care is required as a result of the harm caused by the Investigational Medicinal Product or study procedures, this will be provided free of charge.

If a volunteer has an AE and/or abnormal laboratory value that is known at the time of study vaccination, the specifications of Section 13.0 will be followed.

Volunteers will be followed until the AE resolves or stabilizes or up to the end of the study, whichever comes last. If at the end of the study, an AE (including clinically significant laboratory abnormality) that is considered possibly, probably or definitely related to the Investigational Medicinal Product is unresolved, follow-up will continue until resolution if possible and/or the volunteer will be referred.

### **11.9 Pregnancy**

Although not considered an AE, if a female volunteer becomes pregnant during the study, it is the responsibility of the Principal Investigator or designee to report the pregnancy promptly to the sponsor/designee using the designated forms. Vaccinations will be discontinued and the volunteer followed for safety until the end of pregnancy or study completion, whichever occurs last. If possible, approximately 2–4 weeks after delivery, the baby will be examined by a physician to assess its health status and the results will be reported to the sponsor/designee. The baby will be examined again by a physician around the age of 1 year and the results will be reported to the sponsor/designee.

Complications of pregnancy that meet criteria for a serious adverse event, specified in Section 11.1 of this Protocol (e.g., hospitalization for eclampsia, spontaneous abortion, etc.) should be reported as SAEs.

### **11.10 Intercurrent HIV Infection**

The Investigational Medicinal Products cannot cause HIV infection. If a volunteer acquires HIV through exposure in the community, study vaccinations must be discontinued and the volunteer should have an Early Termination (ET) visit and offered referral to appropriate care and treatment facilities.

Intercurrent HIV infection in study volunteers, although not considered an SAE, must be reported promptly to the sponsor/designee using the designated forms. However, medical conditions associated with the HIV infection that meet criteria for serious specified in the Section 11.1 of this Protocol (e.g., sepsis, Pneumocystis jirovecii [carinii] pneumonia, etc.) should be reported as SAEs using the SAE Report Form.

## **11.11 SAFETY OVERSIGHT**

### **11.11.1 Protocol Safety Review Team (PSRT)**

A PSRT will be formed to monitor the clinical safety data. During the vaccination phase of the trial, the PSRT will review the clinical safety data on a weekly basis via electronic distribution of reports. An ad hoc PSRT review meeting will occur if any of the members of the PSRT requests a special review to discuss a specific safety issue or as specified in the Study Operations Manual. After the vaccination phase the PSRT will review the clinical safety data every 2 weeks.

The PSRT will consist of the Chief Investigator or designee, the IAVI Medical Monitor and PIs or designees from each clinical team. The study Chief Investigator or a sponsor/designee Medical Monitor may be the PSRT chair. Ex officio members will include representatives from the DCC.

Additional PSRT participants may include the following, as needed:

- Co-investigators and trial site senior clinical research nursing staff
- Laboratory directors
- Data management, study statistician and regulatory staff

The PSRT membership and procedures are detailed in the PSRT charter.

### **11.11.2 Data Monitoring and Ethics Committee (DMEC)**

The DMEC will oversee the progress of the study. The DMEC will consist of independent clinicians/scientists/ethicists who are not involved in the study. Investigators responsible for the clinical care of volunteers or representatives of the Sponsor will not be members of the DMEC. Details of membership, chair and co-chair and responsibilities are outlined in the DMEC charter.

Principal Investigator(s) or designee and/or a Sponsor representative may be asked to join an open session of the DMEC meeting to provide information on study conduct, present data or to respond to questions.

Safety data will be reviewed by the DMEC at pre-specified time points and on an ad-hoc basis. The DMEC will review data from the first 10 volunteers at 2 weeks after vaccination with the prime and again at 2 weeks after 10 volunteers have received the boost.

### **11.11.3 Content of Interim Safety Review**

The DMEC will be asked to review the following blinded data:

- Summary of reactogenicity (i.e., solicited adverse events)
- All clinical adverse events judged by the Principal Investigator or designee to be possibly, probably or definitely related to the Investigational Medicinal Product

- All laboratory adverse events confirmed on retest and judged by the Principal Investigator or designee to be possibly, probably, or definitely related to Investigational Medicinal Product and/or clinically significant
- All SAEs
- Any other situation where the PI, CI or Sponsor thinks independent advice or review is important.

An un-blinded presentation of all above-noted events may also be made available for the DMEC for their review if required by any member of the DMEC.

#### **11.11.4 Criteria for Pausing the Study**

Enrolment and vaccinations will be stopped, and a safety review conducted by the DMEC, for any of the following criteria:

1. One or more volunteers experiences a Serious Adverse Event that is judged possibly, probably or definitely related to the IMP.
2. There is a volunteer death, regardless of relationship to the IMP.
3. If two or more volunteers experience grade 3 adverse events (including reactogenicity events) in the same System Organ Class that are considered to be at least possibly related to IMP
4. Any grade 4 adverse event that is considered to be possibly, probably, or definitely related to IMP

The study will continue enrollment and vaccinations only after evaluation of relevant safety data by the DMEC.

The Sponsor will request a review by the DMEC, (or the DMEC chair if other DMEC members cannot be convened), to be held within two business days of the Sponsor learning of the event. The individual volunteer(s)/or study may be unblinded at the discretion of the DMEC.

Following this review, the DMEC will make a recommendation regarding the continuation or suspension of the vaccinations or the trial and communicate this decision immediately to the Sponsor. The Sponsor then will inform the Principal Investigators without delay.

Additional ad hoc review may be specifically requested by the Sponsor, the Principal Investigator(s) or by the DMEC.

## **12 MANAGEMENT OF HIV ISSUES DURING AND FOLLOWING STUDY**

### **12.1 HIV Testing**

All volunteers will be tested for HIV antibodies as indicated in the Schedule of Procedures (Appendix A) or as needed, if medical or social circumstances arise. All volunteers will receive HIV risk reduction counselling and pre- and post-HIV-test counselling, as specified in Section 12.3.1 Counselling.

Volunteers who have a positive HIV-antibody test as a result of vaccine-induced HIV antibodies will have their test results reported as “Not infected with HIV-1 or HIV-2” (to prevent unblinding of volunteer and



staff). A vaccine recipient who still tests HIV positive due to vaccine-induced antibodies (VISP) at the end of the study will be informed of his/her positive test result and offered continuing follow-up until the test becomes negative.

If a volunteer is found to be HIV-infected through exposure to HIV in the community during the course of the study, study vaccinations must be discontinued and the volunteer will be followed up as specified in Section 12.3.

Should a volunteer require HIV testing outside the study for personal reasons, it is recommended that the volunteer contact the study staff first. HIV testing can be done at the study site and then processed at an independent laboratory as above. Written evidence of HIV status (HIV-infected or HIV-uninfected) will be provided upon request.

## **12.2 Social Discrimination as a Result of an Antibody Response to Vaccine**

In order to minimize the possibility of social discrimination among volunteers (if any) who develop vaccine-induced HIV antibodies and test positive on a diagnostic HIV antibody test, appropriate diagnostic HIV testing and certification will be provided both during and after the study as needed.

## **12.3 HIV Infection**

Volunteers who are found HIV infected at screening and volunteers who acquire HIV infection after screening, during the study (intercurrent HIV-infection) will be provided the following:

### **12.3.1 Counselling**

The volunteer will be counselled by the study counsellors. The counselling process will assist the volunteer with the following issues:

- Psychological and social implications of HIV infection
- Who to inform and what to say
- Implications for sexual partners
- Implications for child-bearing
- Avoidance of transmission to others in future

### **12.3.2 Referral for Support /Care**

Volunteers will be referred to a patient support centre or institution of his/her choice for a full discussion of the clinical aspects of HIV infection. Referral will be made to a designated physician or centre for discussion of options of treatment of HIV-infection.

For those individuals who become HIV infected after enrolment in the study (i.e., from first vaccination through final study visit), antiretroviral therapy will be provided when clinically indicated according to nationally accepted treatment guidelines.

Volunteers with confirmed HIV infection should have an early termination visit. In the unlikely event that HIV infection is confirmed during a reactogenicity period, the Medical Monitor should be contacted to determine the course of action on a case-by case-basis.

HIV-infected pregnant women will be referred for prenatal care and to a program for the Prevention of Mother to Child Transmission (PMTCT) as per site-specific procedures. The pregnant volunteer will be followed according to timelines specified in Section 11.8

## **13 DISCONTINUATION OF VACCINATIONS AND/OR WITHDRAWAL FROM STUDY**

### **13.1 Discontinuations of Vaccinations**

Any planned or unplanned discontinuation from further vaccinations will be discussed with the sponsor/designee. Volunteers may be discontinued from further vaccination for any of the following reasons:

1. Pregnancy
2. Intercurrent HIV Infection
3. Use of systemic corticosteroids, immunosuppressive, anticancer, anti-tuberculosis or other medications considered significant by the investigator. Note: Volunteers requiring chronic corticosteroids (> 2 weeks) or long term therapy will not receive any further vaccinations
4. A disease or condition or an adverse event that may develop, regardless of relationship to the Investigational Medicinal Product, if the Principal Investigator or designee is of the opinion that further study vaccinations will jeopardize the safety of the volunteer
5. Any immediate hypersensitivity reaction judged to be related to the IMP, e.g., anaphylaxis and related symptoms such as hives, respiratory difficulty, angioedema and/or abdominal pain
6. Life threatening adverse event following study vaccinations unless not related to the Investigational Medicinal Product
7. Volunteer's request to discontinue further vaccination
8. A grade 4 reactogenicity event
9. A grade 3 reactogenicity event that persists at the grade 3 level longer than 72 hours
10. For grade 3 or greater unsolicited adverse event(s) possibly, probably, or definitely related to the vaccine administrations, evaluation will be on a case-by-case basis with particular emphasis on duration of signs and symptoms and/or any evolving pattern. The site Principal Investigator, and medical monitor will review the adverse event and consult with the Protocol Safety Review Team members prior to a final decision on discontinuation of the volunteer from subsequent vaccination in the trial.

All volunteers discontinued from subsequent vaccination will be followed for safety, at a minimum, until resolution or stabilization of all adverse events or reactions occurring during the follow-up period

The following events require resolution and/or review of clinical history by the Principal Investigator or designee and consultation with the Medical Monitor, prior to continuation of study vaccination(s):

1. Any of the following abnormal laboratory values that are known at the time of vaccination and have not resolved:

*Haematology*

- Haemoglobin: <9.5 g/dl in females; <11.0 g/dl in males
- Absolute Neutrophil Count (ANC) – all volunteers:  $\leq 1,000/\text{mm}^3$
- Absolute Lymphocyte Count (ALC) – all volunteers:  $\leq 650/\text{mm}^3$
- Platelets: <100,000 cells/ $\text{mm}^3$

*Chemistry*

- Creatinine >1.1 x upper limit of normal (ULN)
- AST >1.25 x ULN
- ALT >1.25 x ULN

*Urinalysis: Dipstick 3+ confirmed by microscopy for*

- Protein
- Blood (not due to menses)

All above-noted events should be confirmed on the original sample and/or repeated at least once to confirm abnormal values.

2. Receipt of vaccines (non-HIV) within 28 days or immunoglobulin within 3 months of administration of the Investigational Medicinal Product.
3. A Grade 3 or 4 local reactogenicity event involving the major part of the injected arm circumference.
4. If the use of a short tapering course (<2 weeks) of corticosteroids is required, the study vaccinations may be continued after a 4-week washout period, provided that the medical condition requiring this therapy has completely resolved and in the opinion of both the site investigator and Medical Monitor, the continuation of the study vaccinations will not jeopardize the safety of the volunteer.
5. Participating in another clinical study of an Investigational Medicinal Product

### **13.2 Deferral of Vaccinations**

Vaccinations may be temporarily deferred if the volunteer is clinically ill at the time of the vaccination visit and/or presents with fever at the time of the vaccination visit. A volunteer must be clinically well and afebrile for a minimum of a 24-hour consecutive period prior to vaccination.

### **13.3 Follow up after Discontinuation of Further Vaccinations**

Volunteers, who have study vaccinations discontinued due to adverse events, will be followed until the adverse event resolves or stabilizes or up to the end of the study, whichever comes last. These volunteers will not be replaced.

### **13.4 Withdrawal from the Study (Early Termination)**

Volunteers may be withdrawn from the study permanently for the following reasons:

1. Volunteers may withdraw from the study at any time if they wish, for any reason
2. The Principal Investigator or designee has reason to believe that the volunteer is not complying with the protocol
3. If the sponsor or local regulatory authority decides to terminate or suspend the study
4. If a volunteer becomes infected with HIV (through exposure in the community)

If a volunteer withdraws or is withdrawn from the study, all termination visit procedures will be performed according to the Schedule of Procedures (Appendix A) where possible. Every effort will be made to determine and document the reason for withdrawal.

## **14 STATISTICS**

A detailed statistical analysis plan will be developed by the DCC prior to database lock and final analysis.

### **14.1 Description of Statistical Methods**

#### **14.1.1 Analysis of demographics**

Demographic characteristics (e.g., age at study vaccination in years, gender, ethnicity) will be summarized by group using descriptive statistics:

- Frequency tables will be generated for categorical variables such as gender.
- Mean, median, standard deviation will be provided for continuous data such as age.

#### **14.1.2 Analysis of safety**

Analyses will be performed on the safety population.

All analyses will be descriptive. Summaries will be presented by treatment group and dose, and by combined dose for placebos. Separate summaries will be presented for each site and for all sites combined.

The percentage of volunteers with at least one local solicited AE, with at least one systemic solicited AE (both within 7 days of vaccination) and with any unsolicited AE (within 28 days of vaccination), will be tabulated, with exact 95% CI, by maximum severity per volunteer. Unsolicited AEs will include the proportion of volunteers with any event of grade 3 or 4 severity.

The proportion of volunteers with vaccine related serious adverse events (SAEs) at any time during the study will be summarized.

Solicited local and systemic reactions will also be tabulated by each individual reaction.

The verbatim reports of unsolicited AEs will be coded according to MedDRA. The percentage of volunteers with at least one report of unsolicited AEs classified by MedDRA and reported up to 28 days after vaccination will be tabulated by systemic organ class (SOC), preferred term (PT) and severity, with exact 95% CI.

All unsolicited AE summaries will be repeated for those classed as possibly, probably or definitely related to study product.

At each haematology/biochemistry sampling time point, individual haematological and biochemical values will be presented as number and proportion of volunteers out of range (above or below normal range) and tabulated by toxicity grading (refer to Appendix C).

SAEs and other important medical events will be described in detail. Withdrawals due to AEs/SAEs will also be summarized or listed.

#### **14.1.3 Analysis of immunogenicity**

The study hypothesis is that mosaic immunogens delivered by a prime-boost regimen of non-replicating simian adenovirus followed by non-replicating poxvirus modified vaccinia virus Ankara (MVA) will induce CD8<sup>+</sup> T cells, specific for conserved epitopes common to HIV-1 variants, efficient in controlling HIV-1 infection or helping prevent establishment of chronic infection. Summary statistics will be mainly descriptive, though statistical tests of differences between the prime-boost and placebo groups, and within group tests of changes from baseline will be performed and p-values presented. This study is not powered to detect statistically significant differences between vaccine and placebo recipients in the magnitude or breadth of immune responses, however, it may be possible to discern trends, which could inform the design of future studies.

The analysis of immunogenicity will be performed primarily on the Per-Protocol set. Proportions will be reported as for safety (proportions and exact 95% CIs), but will include group comparisons based on the binomial distribution. All continuous outcomes will be analyzed on a log<sub>10</sub> scale and back-transformed to the original scale for presentation, summarized by number of non-missing values, geometric mean (GM) with 95% CI, median (and 95% CI based on 1000 bootstraps) and range. Fold-rise from baseline will also be analyzed, based on post-baseline minus baseline values (log scale). Between-group comparisons will be analyzed by the Wilcoxon 2-sample test and within group changes from baseline will be analyzed by the signed-rank test.

#### **14.2 The Number of Volunteers**

The primary goal of this study is to evaluate the safety and tolerability of the vaccine regimen. The trial will enrol 88 volunteers and it is not the remit of this study to recruit sufficient numbers of volunteers to be statistically confident about the result. However, the incidence of serious adverse reactions will be used as a measure of the safety of a prime-boost regimen of non-replicating simian adenovirus followed by non-replicating poxvirus modified vaccinia virus Ankara (MVA).

The double-blind, randomised, placebo-controlled design of this study was chosen to minimise bias in the reporting of immunological data. Statistical analysis will be conducted to evaluate changes in CD8<sup>+</sup> T cells, specific for conserved epitopes common to HIV-1 variants, efficient in controlling HIV-1 infection or helping prevent establishment of chronic infection.

This study is not powered to detect a significant difference between the prime-boost regimen and placebo recipients in the magnitude or breadth of immune response to the immunogen. The sample size was chosen based on primary safety concerns, in particular the probability of detecting any SAEs which may be thought to be possibly, probably or definitely related to study product. Tables 2 and 3 show the sample size calculations for safety, which are expressed in terms of the ability to detect serious adverse reactions, i.e. the probabilities of observing 0 and 2+ (2 or more) related SAEs among a group of n=72 (any regimen) for a range of possible true event rates. For example, if none of the 72 volunteers receiving the vaccine experiences an SAE related to the vaccine, the 95% two-sided upper confidence bound for the rate of such reactions in a population exposed to the vaccines is 5%.

Note that every effort will be made to ensure that all randomised volunteers receive at least one IMP administration.

**Table 2. Confidence in observed number of SAEs (n = 72)**

| Observed number of related SAEs | 95% Confidence Interval (exact) |
|---------------------------------|---------------------------------|
| 0                               | 0.0 – 5.0%                      |
| 1                               | 0.04 – 7.5%                     |
| 2                               | 0.3 – 9.7%                      |
| 3                               | 0.9– 11.7%                      |
| 4                               | 1.5 – 13.6%                     |
| 5                               | 2.3 – 15.5%                     |

**Table 3. Probability of observing 0 and 2+ related SAEs at a given SAE rate (n = 72)**

| Event rate (Related SAEs) | Any regimen (n=72) |           |
|---------------------------|--------------------|-----------|
|                           | 0 events           | 2+ events |
| 0.010                     | 0.48               | 0.16      |
| 0.025                     | 0.16               | 0.54      |
| 0.035                     | 0.08               | 0.72      |
| 0.050                     | 0.025              | 0.88      |
| 0.100                     | <0.001             | 0.995     |
| 0.150                     | <0.001             | >0.999    |
| 0.200                     | <0.001             | >0.999    |
| 0.250                     | <0.001             | >0.999    |

### 14.3 The Level of Statistical Significance

This study is not powered to detect statistically significant differences between groups or within groups. However, when reported, p-values <0.05 will be highlighted in the results.

### 14.4 Criteria for the Termination of the Trial

Termination of the trial can occur at any time at the discretion of the sponsor, based on their review of any events or advice from the DMEC that may occur as defined in section 11.11.4, Criteria for Pausing the Study.

### 14.5 Procedure for Accounting for Missing, Unused, and Spurious Data.

All attempts will be made to collect all data per protocol. As missing data are expected to be minimal, no imputation will be performed for missing values.

### 14.6 Analysis Populations

#### 14.6.1 Safety Population

The safety population will include all volunteers with at least one vaccine/placebo administration documented.

#### 14.6.2 Per Protocol Population (PP Population)

The PP population will be applied separately to each immunogenicity outcome and adapted by time point. To be eligible for the PP Population, the analysis time point must occur within the visit window and, up to the analysis time point, the volunteer must: 1) receive all scheduled doses per protocol, 2) have complete immunogenicity data, 3) have no major protocol deviations and 4) not receive any concomitant medications that potentially affect immunogenicity.

### **14.6.3 Unblinded Volunteers**

If a volunteer is unblinded then any data collected after unblinding will be excluded from analysis.

## **14.7 Procedures for Reporting any Deviation(s) from the Original Statistical Plan**

There are currently no deviations from the original statistical plan.

## **15 DATA MANAGEMENT**

### **15.1 Source Data**

Source documents are the documents where data are first recorded, and from which volunteers' CRF data are obtained. These include, but are not limited to, hospital records (from which medical history and previous and concurrent medication may be summarised into the CRF), clinical and office charts, laboratory and pharmacy records, diaries, microfiches, radiographs, and correspondence.

CRF entries will be considered source data if the CRF is the site of the original recording (e.g. there is no other written or electronic record of data). All documents will be stored safely in confidential conditions. On all trial-specific documents, other than the signed consent, the volunteer will be referred to by the trial volunteer number/code, not by name.

### **15.2 Access to Data**

Direct access will be granted to authorised representatives from the Sponsor, host institution and the regulatory authorities to permit trial-related monitoring, audits and inspections.

### **15.3 Data Recording and Record Keeping**

All trial data will be entered in the clinical trial database. Note that ICH GCP (Section 5.5) requires that electronic data entry systems are validated and that Standard Operating Procedures are maintained.

The volunteer will be identified by a unique trial specific number and/or code in any database. The name and any other identifying detail will NOT be included in any trial data electronic file.

### **15.4 DATA ENTRY AT STUDY SITE**

The data collected at the site will be entered directly into the access -controlled clinical trial database, with a complete audit trail documenting all entries and changes made within the database. Some data, such as laboratory results, will be captured on source documents prior to entry into the clinical trial database. Source documents and CRFs may be used to capture clinical data in instances where access to the clinical trial database is unavailable due to connectivity issues. This is indicated on the Source Document Confirmation form. To provide for real time assessment of safety, data should be entered as soon as is reasonably feasible after a visit occurs keeping to the time limit specified in the SOM.



## **16 QUALITY ASSURANCE PROCEDURES**

To ensure the quality and reliability of the data collected and generated and the ethical conduct of this study, a Study Operations Manual will be developed. All deviations will be reported and investigated. The Study Operations Manual describes reporting and deviation documentation requirements and procedures. Regular monitoring will be performed according to ICH-GCP as indicated in Section 17.2. An independent audit of the study and study sites may be performed by the Sponsor or designee to establish the status of applicable quality systems. Inspection by regulatory authorities may also occur. By signing the protocol, the Principal Investigators agree to facilitate study related monitoring, audits, IEC/IRB review and regulatory inspection(s) and direct access to source documents. Such information will be treated as strictly confidential and under no circumstances be made publicly available

## **17 DATA AND BIOLOGICAL MATERIAL**

All data and biological material collected through the study shall be managed in accordance with the Clinical Trial Agreement (CTA). Distribution and use of these data will be conducted by agreement of all parties. The computerized raw data generated will be held by the DCC on behalf of the Sponsor. The study site will also hold the final data files and tables generated for the purpose of analysis. Principal investigators or designees will have access to the clinical study database with appropriate blinding.

## **18 ADMINISTRATIVE STRUCTURE**

The Principal Investigator will be responsible for all aspects of the study at the study site

### **18.1 Study Supervision**

The Principal Investigator will work closely with his/her study team to implement the study, address issues in a timely manner, assure consistent documentation, and compile and provide study progress reports to the Medical Monitor and DMEC. Accrual and retention rates, safety of study volunteers, and other relevant parameters will be regularly and closely monitored by the study team, Principal Investigator, Medical Monitor, and the DMEC.

### **18.2 Study Monitoring**

Study monitoring will be conducted by IAVI. Monitoring will be conducted to ensure that: the rights and wellbeing of volunteers are protected; the reported data are accurate, complete and verifiable from source documents; and that study conduct complies with the currently approved protocol, standard operating procedures, Good Clinical Practice (GCP) and other applicable regulatory requirements.

Study monitors will regularly visit the study sites to review all trial documents including volunteer screening and enrolment logs, informed consent forms, source documents, CRFs, laboratory and medical records. The specific objectives of a monitoring visit will be to verify: 1) to verify the existence of adequately signed informed consent forms for each enrolled volunteer; 2) to verify the prompt, complete and accurate recording of data, and prompt reporting of all SAEs and SUSARs; 3) to verify the quality and accuracy of data by validation of CRFs against the source documents such as volunteers' medical records, laboratory reports, and any other relevant original data; 4) to verify adequate IMP supply, storage, management, and accountability; and 5) to ensure protection of study volunteers, and investigators' compliance with the protocol, regulatory requirements and applicable guidelines.

Study investigators and volunteers agree that the study monitor may review study facilities and source records and observe the performance of study procedures. Additionally, study investigators will permit inspection or audit of the study facilities and all study-related records by relevant regulatory authorities, the local IRB/IEC and/or representatives of the Sponsor. All information collected during monitoring or audit visits will be treated as strictly confidential and will under no circumstances be made publicly available.

### **18.3 Investigator's Records**

Study records include administrative documentation, including reports and correspondence relating to the study, as well as documentation related to each volunteer screened for and/or enrolled in the study (e.g., screening and enrolment logs, locator information forms, informed consent forms, laboratory reports, case report forms, and all other source documents). The Principal Investigator will maintain and store, in a secure manner, complete, accurate, and current study records for a minimum of 5 years or according to local regulation (whichever longer) after the study is terminated and applicable regulatory authorities are notified. Study documents must not be destroyed without notifying the Sponsor.

## **19 SERIOUS BREACHES**

A serious breach is defined as "A breach of GCP or the trial protocol which is likely to affect to a significant degree –

- (a) the safety or physical or mental integrity of the volunteers in the trial; or
- (b) the scientific value of the trial".

In the event that a serious breach is suspected, the Sponsor must be contacted within 1 working day. In collaboration with the PI, the serious breach will be reviewed by the Sponsor and, if appropriate, the Sponsor will ensure it is reported to the REC committee and relevant regulatory authorities within seven calendar days.

## **20 ETHICAL AND REGULATORY CONSIDERATIONS**

### **20.1 Declaration of Helsinki Guidelines for Good Clinical Practice**

The Principal Investigator will ensure that the study is conducted in compliance with the protocol, SOPs in accordance with guidelines formulated by the ICH for GCP in clinical studies, the ethical principles that have their origins in the Declaration of Helsinki and applicable local standards and regulatory requirements.

Deidentified volunteer-level study data may be shared with other researchers or made public in the future.

### **20.2 Approvals**

The protocol, protocol amendments, site-specific informed consent documents, proposed recruitment materials, and other relevant documents will be reviewed and approved by the relevant local Research Ethics Committee (REC) and regulatory authorities. The trial will not be initiated before all the necessary approvals have been obtained. Amendments to the protocol will not be implemented without prior written REC approval except when they involve only logistical or administrative aspects of the study. The Principal Investigator will still have to submit such logistical or administrative amendments to REC.

The protocol, informed consent form, information sheet and any proposed advertising material will be submitted to an appropriate Research Ethics Committee (REC), regulatory authorities, and host institution(s) for written approval.

The Investigator will submit and, where necessary, obtain approval from the above parties for all substantial amendments to the original approved documents.

### **20.3 Reporting**

The Principal Investigator shall submit once a year throughout the clinical trial, or on request, an Annual Progress Report to the REC, other regulatory authorities, and the Sponsor. In addition, an End of Trial notification and final report will be submitted to these institutions.

The Chief Investigator shall submit once a year throughout the clinical trial, or on request, an Annual Progress Report to the RECs, (including Oxford Tropical Medicine Ethics Committee (OxTREC)) and Sponsor. In addition, an End of Trial notification and final report will be submitted to the, the RECs, OxTREC and Sponsor.

### **20.4 Volunteer Confidentiality**

The trial staff will ensure that the volunteers' anonymity is maintained. The volunteers will be identified only by a volunteer ID number on all laboratory specimens, trial documents and any electronic database. All documents will be stored securely and only accessible by trial staff and authorised personnel. Clinical information will not be released without written permission from the volunteer except as necessary for monitoring or auditing of the study.

### **20.5 Expenses and Benefits**

Volunteers will be reimbursed for their time, effort and for costs to cover their travel expenses to the study site and any inconvenience due to study participation. Research centre-specific reimbursement amounts will be specified in the research centre-specific informed consent forms.

## **21 FINANCE AND INSURANCE**

### **21.1 Funding**

The study will be funded primarily by a grant from the European and Developing Countries Clinical Trials Partnership. The GMP manufacture of vaccines was funded by IAVI through the SOW 5, EDCTP through the GREAT award and EC H2020 through the EAVI 2020 award.

### **21.2 Indemnity**

If any volunteer is harmed as a result of this trial, medical care will be provided. The sponsor should provide care until complete cure or stabilization of a research related injury. The injured research volunteer shall be given the best care available within the country for the research related injury. Research volunteers shall not be required to waive their legal rights for redress in courts of law.

#### *Negligent Harm*

Indemnity and/or compensation for negligent harm arising specifically from an accidental injury for which the University is legally liable as the Research Sponsor will be covered by the University of Oxford.

#### *Non-Negligent Harm*

Indemnity and/or compensation for harm arising specifically from an accidental injury, and occurring as a consequence of the Research volunteers' participation in the trial for which the University is the Research Sponsor will be covered by the University of Oxford.

### **21.3 Insurance**

The University of Oxford has a specialist insurance policy in place which would operate in the event of any volunteer suffering harm as a result of their involvement in the research (Newline Underwriting Management Ltd, at Lloyd's of London and in Uganda specifically, a local insurance company, Jubilee Insurance Ltd.)

## **22 PUBLICATION POLICY**

A primary manuscript and if appropriate ancillary manuscripts will be prepared promptly after data analysis is completed using mutually accepted Publication Guidelines. Authorship criteria will be based on contributions to the design, work, analysis and writing of the study report and authors may include investigators at the clinical research centres (CRCs) in Kenya, Uganda and Zambia, UOXF and IAVI. The trial results will be disseminated at organized meetings that will bring together stakeholders within the respective countries and will include at minimum, Government representatives from appropriate Ministries, research organizations, non-governmental organizations, the media, civil societies and

community representatives. A summary of the main findings will be developed that will be in non-technical language and translated into local language at the respective CRCs to be communicated to trial volunteers.

## 23 REFERENCES

1. UNAIDS. Fact sheet - Latest global and regional statistics on the status of the AIDS epidemic. *Unaid*s [online]. 2017. No. June, p. 8. DOI 2017. Available from: [http://www.unaids.org/sites/default/files/media\\_asset/UNAIDS\\_FactSheet\\_en.pdf](http://www.unaids.org/sites/default/files/media_asset/UNAIDS_FactSheet_en.pdf)
2. WORLD HEALTH ORGANIZATION. Access to anti-retroviral drugs in low and middle income countries. *World Health Organization* [online]. 2014. No. July, p. 1–37. Available from: [http://apps.who.int/iris/bitstream/10665/128150/1/9789241507547\\_eng.pdf?ua=1&ua=1](http://apps.who.int/iris/bitstream/10665/128150/1/9789241507547_eng.pdf?ua=1&ua=1)
3. OSTERBERG, Lars and BLASCHKE, Terrence. Adherence to Medication. *New England Journal of Medicine* [online]. 4 August 2005. Vol. 353, no. 5, p. 487–497. DOI 10.1056/NEJMra050100. Available from: <http://www.nejm.org/doi/abs/10.1056/NEJMra050100>
4. WEISER, John, BROOKS, John T., SKARBINSKI, Jacek, et al. Barriers to Universal Prescribing of Antiretroviral Therapy by HIV Care Providers in the United States, 2013–2014. *JAIDS Journal of Acquired Immune Deficiency Syndromes* [online]. April 2017. Vol. 74, no. 5, p. 479–487. DOI 10.1097/QAI.0000000000001276. Available from: <http://insights.ovid.com/crossref?an=00126334-201704150-00001>
5. SANOU, M. P., ROFF, S. R., MENNELLA, A., et al. Evolutionarily Conserved Epitopes on Human Immunodeficiency Virus Type 1 (HIV-1) and Feline Immunodeficiency Virus Reverse Transcriptases Detected by HIV-1-Infected Subjects. *Journal of Virology* [online]. 15 September 2013. Vol. 87, no. 18, p. 10004–10015. DOI 10.1128/JVI.00359-13. Available from: <http://jvi.asm.org/cgi/doi/10.1128/JVI.00359-13>
6. ANTROBUS, Richard D, COUGHLAN, Lynda, BERTHOUD, Tamara K, et al. Clinical Assessment of a Novel Recombinant Simian Adenovirus ChAdOx1 as a Vectored Vaccine Expressing Conserved Influenza A Antigens. *Molecular Therapy* [online]. March 2014. Vol. 22, no. 3, p. 668–674. DOI 10.1038/mt.2013.284. Available from: <http://linkinghub.elsevier.com/retrieve/pii/S152500161631190X>
7. MORRIS, Susan J, SEBASTIAN, Sarah, SPENCER, Alexandra J and GILBERT, Sarah C. Simian adenoviruses as vaccine vectors. *Future Virology* [online]. September 2016. Vol. 11, no. 9, p. 649–659. DOI 10.2217/fvl-2016-0070. Available from: <https://www.futuremedicine.com/doi/10.2217/fvl-2016-0070>
8. EWER, Katie, SEBASTIAN, Sarah, SPENCER, Alexandra J., et al. Chimpanzee adenoviral vectors as vaccines for outbreak pathogens. *Human Vaccines & Immunotherapeutics* [online]. 2 December 2017. Vol. 13, no. 12, p. 3020–3032. DOI 10.1080/21645515.2017.1383575. Available from: <https://www.tandfonline.com/doi/full/10.1080/21645515.2017.1383575>
9. ALTENBURG, Arwen, KREIJTZ, Joost, DE VRIES, Rory, et al. Modified Vaccinia Virus Ankara (MVA) as Production Platform for Vaccines against Influenza and Other Viral Respiratory Diseases. *Viruses* [online]. 17 July 2014. Vol. 6, no. 7, p. 2735–2761. DOI 10.3390/v6072735. Available from: <http://www.mdpi.com/1999-4915/6/7/2735>
10. COLLINS, Nicholas and BELKAID, Yasmine. Do the Microbiota Influence Vaccines and Protective Immunity to Pathogens? *Cold Spring Harbor Perspectives in Biology* [online]. February 2018. Vol. 10, no. 2, p. a028860. DOI 10.1101/cshperspect.a028860. Available from: <http://cshperspectives.cshlp.org/lookup/doi/10.1101/cshperspect.a028860>
11. ELOE-FADROSH, Emiley A, MCARTHUR, Monica A, SEEKATZ, Anna M, et al. Impact of oral typhoid vaccination on the human gut microbiota and correlations with s. Typhi-specific immunological responses. *PLoS one* [online]. 2013. Vol. 8, no. 4, p. e62026. DOI 10.1371/journal.pone.0062026. Available from: <http://www.ncbi.nlm.nih.gov/pubmed/23637957>

12. OH, Jason Z, RAVINDRAN, Rajesh, CHASSAING, Benoit, et al. TLR5-mediated sensing of gut microbiota is necessary for antibody responses to seasonal influenza vaccination. *Immunity* [online]. 18 September 2014. Vol. 41, no. 3, p. 478–492. DOI 10.1016/j.immuni.2014.08.009. Available from: <http://www.ncbi.nlm.nih.gov/pubmed/25220212>
13. WILLIAMS, Wilton B, HAN, Qifeng and HAYNES, Barton F. Cross-reactivity of HIV vaccine responses and the microbiome. *Current opinion in HIV and AIDS* [online]. January 2018. Vol. 13, no. 1, p. 9–14. DOI 10.1097/COH.0000000000000423. Available from: <http://www.ncbi.nlm.nih.gov/pubmed/29035947>
14. KUKKONEN, Kaarina, NIEMINEN, Tea, POUSSA, Tuija, SAVILAHTI, Erkki and KUITUNEN, Mikael. Effect of probiotics on vaccine antibody responses in infancy--a randomized placebo-controlled double-blind trial. *Pediatric allergy and immunology : official publication of the European Society of Pediatric Allergy and Immunology* [online]. September 2006. Vol. 17, no. 6, p. 416–21. DOI 10.1111/j.1399-3038.2006.00420.x. Available from: <http://www.ncbi.nlm.nih.gov/pubmed/16925686>
15. SOH, Shu E, ONG, Dave Qi Rong, GEREZ, Irvin, et al. Effect of probiotic supplementation in the first 6 months of life on specific antibody responses to infant Hepatitis B vaccination. *Vaccine* [online]. 19 March 2010. Vol. 28, no. 14, p. 2577–9. DOI 10.1016/j.vaccine.2010.01.020. Available from: <http://www.ncbi.nlm.nih.gov/pubmed/20105426>
16. COLLOCA, S., BARNES, E., FOLGORI, A., et al. Vaccine Vectors Derived from a Large Collection of Simian Adenoviruses Induce Potent Cellular Immunity Across Multiple Species. *Science Translational Medicine* [online]. 4 January 2012. Vol. 4, no. 115, p. 115ra2-115ra2. DOI 10.1126/scitranslmed.3002925. Available from: <http://stm.sciencemag.org/cgi/doi/10.1126/scitranslmed.3002925>
17. TATSIS, N, TESEMA, L, ROBINSON, E R, et al. Chimpanzee-origin adenovirus vectors as vaccine carriers. *Gene therapy* [online]. March 2006. Vol. 13, no. 5, p. 421–9. DOI 10.1038/sj.gt.3302675. Available from: <http://www.ncbi.nlm.nih.gov/pubmed/16319951>
18. NWANEGBU, Edward, VARDAS, Eftyhia, GAO, Wentao, et al. Prevalence of neutralizing antibodies to adenoviral serotypes 5 and 35 in the adult populations of The Gambia, South Africa, and the United States. *Clinical and diagnostic laboratory immunology* [online]. March 2004. Vol. 11, no. 2, p. 351–7. Available from: <http://www.ncbi.nlm.nih.gov/pubmed/15013987>
19. DICKS, Matthew D J, SPENCER, Alexandra J, EDWARDS, Nick J, et al. A novel chimpanzee adenovirus vector with low human seroprevalence: improved systems for vector derivation and comparative immunogenicity. *PloS one* [online]. 2012. Vol. 7, no. 7, p. e40385. DOI 10.1371/journal.pone.0040385. Available from: <http://www.ncbi.nlm.nih.gov/pubmed/22808149>
20. ONDONDO, Beatrice, MURAKOSHI, Hayato, CLUTTON, Genevieve, et al. Novel Conserved-region T-cell Mosaic Vaccine With High Global HIV-1 Coverage Is Recognized by Protective Responses in Untreated Infection. *Molecular therapy : the journal of the American Society of Gene Therapy* [online]. April 2016. Vol. 24, no. 4, p. 832–42. DOI 10.1038/mt.2016.3. Available from: <http://www.ncbi.nlm.nih.gov/pubmed/26743582>
21. ANTROBUS, Richard D., COUGHLAN, Lynda, BERTHOUD, Tamara K., et al. Clinical assessment of a novel recombinant simian adenovirus ChAdOx1 as a vectored vaccine expressing conserved influenza A antigens. *Molecular Therapy*. 2014. Vol. 22, no. 3, p. 668–674. DOI 10.1038/mt.2013.284.
22. FISCHER, Will, PERKINS, Simon, THEILER, James, et al. Polyvalent vaccines for optimal coverage of

potential T-cell epitopes in global HIV-1 variants. *Nature medicine* [online]. January 2007. Vol. 13, no. 1, p. 100–6. DOI 10.1038/nm1461. Available from: <http://www.ncbi.nlm.nih.gov/pubmed/17187074>

23. MOTHE, Beatriz, LLANO, Anuska, IBARRONDO, Javier, et al. Definition of the viral targets of protective HIV-1-specific T cell responses. *Journal of translational medicine* [online]. 7 December 2011. Vol. 9, p. 208. DOI 10.1186/1479-5876-9-208. Available from: <http://www.ncbi.nlm.nih.gov/pubmed/22152067>
24. YANG, Otto O., ALI, Ayub, KASAHARA, Noriyuki, et al. Short Conserved Sequences of HIV-1 Are Highly Immunogenic and Shift Immunodominance. SILVESTRI, G. (ed.), *Journal of Virology* [online]. 15 January 2015. Vol. 89, no. 2, p. 1195–1204. DOI 10.1128/JVI.02370-14. Available from: <http://jvi.asm.org/lookup/doi/10.1128/JVI.02370-14>
25. WAHREN, B, DREXLER, I, SUTTER, G, HELLER, K and ERFLE, V. Highly attenuated modified vaccinia virus Ankara replicates in baby hamster kidney cells, a potential host for virus propagation, but not in various human transformed and primary cells. *Journal of General Virology* [online]. 1 February 1998. Vol. 79, no. 2, p. 347–352. DOI 10.1099/0022-1317-79-2-347. Available from: <http://jgv.microbiologyresearch.org/content/journal/jgv/10.1099/0022-1317-79-2-347>
26. MAYR, A, STICKL, H, MÜLLER, H K, DANNER, K and SINGER, H. [The smallpox vaccination strain MVA: marker, genetic structure, experience gained with the parenteral vaccination and behavior in organisms with a debilitated defence mechanism (author's transl)]. *Zentralblatt für Bakteriologie, Parasitenkunde, Infektionskrankheiten und Hygiene. Erste Abteilung Originale. Reihe B: Hygiene, Betriebshygiene, präventive Medizin* [online]. December 1978. Vol. 167, no. 5–6, p. 375–90. Available from: <http://www.ncbi.nlm.nih.gov/pubmed/219640>
27. SUTTER, G and MOSS, B. Nonreplicating vaccinia vector efficiently expresses recombinant genes. *Proceedings of the National Academy of Sciences of the United States of America* [online]. 15 November 1992. Vol. 89, no. 22, p. 10847–51. Available from: <http://www.ncbi.nlm.nih.gov/pubmed/1438287>
28. HANKE, Tomás, MCMICHAEL, Andrew J, DENNIS, Michael J, et al. Biodistribution and persistence of an MVA-vectored candidate HIV vaccine in SIV-infected rhesus macaques and SCID mice. *Vaccine* [online]. 10 February 2005. Vol. 23, no. 12, p. 1507–14. DOI 10.1016/j.vaccine.2004.08.050. Available from: <http://www.ncbi.nlm.nih.gov/pubmed/15670887>
29. HANKE, T, MCMICHAEL, A J, SAMUEL, Rachel V, et al. Lack of toxicity and persistence in the mouse associated with administration of candidate DNA- and modified vaccinia virus Ankara (MVA)-based HIV vaccines for Kenya. *Vaccine* [online]. 22 November 2002. Vol. 21, no. 1–2, p. 108–14. Available from: <http://www.ncbi.nlm.nih.gov/pubmed/12443668>
30. ONDONDO, Beatrice, BRENNAN, Caroline, NICOSIA, Alfredo, CROME, Steven J. and HANKE, Tomáš. Absence of systemic toxicity changes following intramuscular administration of novel pSG2.HIVconsV DNA, ChAdV63.HIVconsV and MVA.HIVconsV vaccines to BALB/c mice. *Vaccine*. 2013. Vol. 31, no. 47, p. 5594–5601. DOI 10.1016/j.vaccine.2013.06.068.
31. BORTHWICK, Nicola, AHMED, Tina, ONDONDO, Beatrice, et al. Vaccine-elicited Human T Cells Recognizing Conserved Protein Regions Inhibit HIV-1. *Molecular Therapy* [online]. February 2014. Vol. 22, no. 2, p. 464–475. DOI 10.1038/mt.2013.248. Available from: <http://linkinghub.elsevier.com/retrieve/pii/S1525001616311674>
32. BORTHWICK, Nicola, LIN, Zhansong, AKAHOSHI, Tomohiro, et al. Novel, in-natural-infection subdominant HIV-1 CD8+ T-cell epitopes revealed in human recipients of conserved-region T-cell vaccines. *PLoS one* [online]. 2017. Vol. 12, no. 4, p. e0176418. DOI 10.1371/journal.pone.0176418.



Available from: <http://www.ncbi.nlm.nih.gov/pubmed/28448594>

33. HANCOCK, Gemma, MORÓN-LÓPEZ, Sara, KOPYCINSKI, Jakub, et al. Evaluation of the immunogenicity and impact on the latent HIV-1 reservoir of a conserved region vaccine, MVA.HIVconsv, in antiretroviral therapy-treated subjects. *Journal of the International AIDS Society* [online]. 2017. Vol. 20, no. 1, p. 21171. DOI 10.7448/IAS.20.1.21171. Available from: <http://doi.wiley.com/10.7448/IAS.20.1.21171>
34. HAYTON, Emma-Jo, ROSE, Annie, IBRAHIMSA, Umar, et al. Safety and Tolerability of Conserved Region Vaccines Vectored by Plasmid DNA, Simian Adenovirus and Modified Vaccinia Virus Ankara Administered to Human Immunodeficiency Virus Type 1-Uninfected Adults in a Randomized, Single-Blind Phase I Trial. GOEPFERT, Paul A. (ed.), *PLoS ONE* [online]. 9 July 2014. Vol. 9, no. 7, p. e101591. DOI 10.1371/journal.pone.0101591. Available from: <http://dx.plos.org/10.1371/journal.pone.0101591>
35. MOTHE B, MANZARDO C, SNACHEZ-BERNABEAU A, COLL P, MORON S, PEURTAS MC, et al. Therapeutic ChAdV63.HIVconsv-MVA.HIVconsv vaccination refocused T cells to conserved regions of HIV in early reated HIV-1 infected individuals. *Submitted*.
36. MOTHE B, MOLTÓ J, MANZARDO C, COLL J, PUERTAS MC, MARTINEZ-PICADO J, et al. Viral control induced by HIVconsv vaccines & Romidepsin in early treated individuals. In : *The Conference on Retroviruses and Opportunistic Infections; Seattle, WA, USA*. 2017.
37. MUTUA, Gaudensia, FARAH, Bashir, LANGAT, Robert, et al. Broad HIV-1 inhibition in vitro by vaccine-elicited CD8+ T cells in African adults. *Molecular Therapy - Methods & Clinical Development* [online]. 2016. Vol. 3, p. 16061. DOI 10.1038/mtm.2016.61. Available from: <http://linkinghub.elsevier.com/retrieve/pii/S2329050117300311>
38. LÉTOURNEAU, Sven, IM, Eung-Jun, MASHISHI, Tumelo, et al. Design and pre-clinical evaluation of a universal HIV-1 vaccine. *PloS one* [online]. 3 October 2007. Vol. 2, no. 10, p. e984. DOI 10.1371/journal.pone.0000984. Available from: <http://www.ncbi.nlm.nih.gov/pubmed/17912361>
39. ZOU, Chengcheng, MURAKOSHI, Hayato, KUSE, Nozomi, et al. Effective Suppression of HIV-1 Replication by Cytotoxic T Lymphocytes Specific for Pol Epitopes in Conserved Mosaic Vaccine Immunogens. *Journal of virology* [online]. 1 April 2019. Vol. 93, no. 7. DOI 10.1128/JVI.02142-18. Available from: <http://www.ncbi.nlm.nih.gov/pubmed/30674626>
40. BADEN, Lindsey R, KARITA, Etienne, MUTUA, Gaudensia, et al. Assessment of the Safety and Immunogenicity of 2 Novel Vaccine Platforms for HIV-1 Prevention: A Randomized Trial. *Annals of internal medicine* [online]. 1 March 2016. Vol. 164, no. 5, p. 313–22. DOI 10.7326/M15-0880. Available from: <http://www.ncbi.nlm.nih.gov/pubmed/26833336>

## 24 APPENDIX A: SCHEDULE OF PROCEDURES

| Procedure / Study week                     | Screen  | 0 | 1  | 2 <sup>4</sup> | 4  | 5  | 6  | 8  | 12 | 16  | 30  | 44  | 48 <sup>3</sup> |
|--------------------------------------------|---------|---|----|----------------|----|----|----|----|----|-----|-----|-----|-----------------|
| Study day                                  | -28     | 0 | 7  | 14             | 28 | 35 | 42 | 56 | 84 | 112 | 210 | 308 | 336             |
| Visit windows (days)                       | (≤ -28) | 0 | ±3 | ±3             | ±3 | ±3 | ±3 | ±3 | ±7 | ±7  | ±7  | ±7  | ±7              |
| Informed consent                           | X       |   |    |                |    |    |    |    |    |     |     |     |                 |
| Confirm eligibility                        | X       | X |    |                |    |    |    |    |    |     |     |     |                 |
| Randomisation                              |         | X |    |                |    |    |    |    |    |     |     |     |                 |
| <b>VACCINATIONS</b>                        |         |   |    |                |    |    |    |    |    |     |     |     |                 |
| ChAdOx1.tHIVconv1 or Placebo               |         | X |    |                |    |    |    |    |    |     |     |     |                 |
| MVA.tHIVconv3 and MVA.tHIVconv4 or Placebo |         |   |    |                | X  |    |    |    |    |     |     |     |                 |
| <b>COUNSELLING</b>                         |         |   |    |                |    |    |    |    |    |     |     |     |                 |
| HIV Risk Reduction Counselling             | X       | X |    |                | X  |    |    | X  |    | X   | X   | X   | X               |
| HIV Test Counselling                       | X       | X |    |                | X  |    |    | X  |    | X   | X   | X   | X               |
| Family Planning Counselling                | X       | X |    |                | X  |    |    | X  | X  | X   | X   | X   | X               |
| Social Impact Assessment                   |         |   |    |                |    |    |    |    |    |     |     |     | X               |
| <b>CLINICAL ASSESSMENTS</b>                |         |   |    |                |    |    |    |    |    |     |     |     |                 |
| HIV-1 Risk Assessment                      | X       | X |    |                | X  |    |    | X  | X  | X   | X   | X   | X               |
| Comprehensive Medical History              | X       |   |    |                |    |    |    |    |    |     |     |     |                 |
| Interim Medical History                    |         | X | X  | X              | X  | X  | X  | X  | X  | X   | X   | X   | X               |
| General Physical Exam                      | X       | X |    |                | X  |    |    |    |    |     |     |     | X               |
| Symptom Directed Physical Exam             |         |   | X  |                |    | X  | X  | X  | X  | X   | X   | X   |                 |
| Weight                                     | X       |   |    |                |    |    |    |    |    |     |     |     | X               |
| Height                                     | X       |   |    |                |    |    |    |    |    |     |     |     |                 |

| Procedure / Study week                                                  | Screen  | 0              | 1  | 2 <sup>4</sup> | 4              | 5  | 6  | 8  | 12 | 16  | 30  | 44  | 48 <sup>3</sup> |
|-------------------------------------------------------------------------|---------|----------------|----|----------------|----------------|----|----|----|----|-----|-----|-----|-----------------|
| Study day                                                               | -28     | 0              | 7  | 14             | 28             | 35 | 42 | 56 | 84 | 112 | 210 | 308 | 336             |
| Visit windows (days)                                                    | (≤ -28) | 0              | ±3 | ±3             | ±3             | ±3 | ±3 | ±3 | ±7 | ±7  | ±7  | ±7  | ±7              |
| Vital signs                                                             | X       | X <sup>2</sup> | X  |                | X <sup>2</sup> | X  | X  | X  | X  | X   | X   | X   | X               |
| Cervical & Axillary lymph nodes                                         |         | X              | X  |                | X              | X  |    |    |    |     |     |     |                 |
| Adverse Events                                                          |         | X              | X  | X              | X              | X  | X  | X  |    |     |     |     |                 |
| Serious Adverse Events                                                  |         | X              | X  | X              | X              | X  | X  | X  | X  | X   | X   | X   | X               |
| Concomitant Medications                                                 | X       | X              | X  | X              | X              | X  | X  | X  |    |     |     |     |                 |
| Local and Systemic Reactogenicity Assessment <sup>1</sup>               |         | X <sup>2</sup> | X  |                | X <sup>2</sup> | X  |    |    |    |     |     |     |                 |
| <b>LABORATORY PROCEDURES</b>                                            |         |                |    |                |                |    |    |    |    |     |     |     |                 |
| HBsAg, HCV Antibodies,                                                  | X       |                |    |                |                |    |    |    |    |     |     |     |                 |
| Syphilis, <i>Chlamydia trachomatis</i> and <i>Neisseria gonorrhoeae</i> | X       |                |    |                |                |    |    | X  |    | X   | X   |     | X               |
| HIV-testing                                                             | X       | X              |    |                | X              |    |    | X  |    | X   | X   | X   | X               |
| Urinalysis                                                              | X       |                |    |                |                |    |    | X  |    |     |     | X   |                 |
| Routine Haematology                                                     | X       | X              | X  |                | X              | X  |    | X  |    |     | X   |     | X               |
| Biochemistry                                                            | X       | X              | X  |                | X              | X  |    | X  |    |     |     |     |                 |
| Pregnancy Test (if applicable)                                          | X       | X              |    |                | X              |    |    | X  |    | X   |     |     | X               |
| Faecal samples <sup>5</sup>                                             |         | X <sup>6</sup> |    |                |                | X  |    |    |    |     |     |     | X               |
| <b>IMMUNOLOGY</b>                                                       |         |                |    |                |                |    |    |    |    |     |     |     |                 |
| HLA Typing                                                              |         | X              |    |                |                |    |    |    |    |     |     |     |                 |
| Fresh ELISpots                                                          |         | X              |    |                |                | X  |    |    |    |     |     | X   |                 |
| PBMC, serum and plasma storage (frozen ELISpot, VIA, ICS, memory)       |         | X              |    |                |                | X  | X  |    |    |     |     | X   |                 |

| Procedure / Study week | Screen  | 0 | 1  | 2 <sup>4</sup> | 4  | 5  | 6  | 8  | 12 | 16  | 30  | 44  | 48 <sup>3</sup> |
|------------------------|---------|---|----|----------------|----|----|----|----|----|-----|-----|-----|-----------------|
| Study day              | -28     | 0 | 7  | 14             | 28 | 35 | 42 | 56 | 84 | 112 | 210 | 308 | 336             |
| Visit windows (days)   | (≤ -28) | 0 | ±3 | ±3             | ±3 | ±3 | ±3 | ±3 | ±7 | ±7  | ±7  | ±7  | ±7              |
| Epitope Mapping        |         |   |    |                |    |    |    | X  | X  |     |     |     |                 |

<sup>1</sup>Reactogenicity will be collected from Day 0 to Day 7 after each vaccination.

<sup>2</sup>Collect at baseline and at least 30 min post vaccination

<sup>3</sup> Early Termination (ET): Procedures to be performed at ET are the same as the Week 48 visit procedures.

<sup>4</sup> Visit can be conducted by phone. The visit may also be conducted in the clinic.

<sup>5</sup> Faecal sample collection will be optional

<sup>6</sup> Faecal sample should be collected before administration of the first vaccine dose at enrollment

## 25 APPENDIX B: AMENDMENT HISTORY

| Amendment No. | Protocol Version No. | Date issued | Author(s) of changes | Details of Changes made |
|---------------|----------------------|-------------|----------------------|-------------------------|
|               |                      |             |                      |                         |

List details of all protocol amendments here whenever a new version of the protocol is produced.

Protocol amendments must be submitted to the Sponsor for approval prior to submission to the REC committee or MHRA.

## 26 APPENDIX C: ADVERSE EVENT SEVERITY ASSESSMENT TABLE

The Division of AIDS (DAIDS) Table for Grading the Severity of Adult and Pediatric Adverse Events.  
Version 2.1 July 2017.

<https://rsc.niaid.nih.gov/sites/default/files/daidsgradingcorrectedv21.pdf> (accessed 28th July 2019).
